# Supplementary material for: Spontaneous reduction and C–H borylation of arenes mediated by uranium(III) disproportionation
Source: Springer Nature journal article supplement (doi:10.1038/nchem.1392), 2012-07-13
Supplement: 41557_2012_BFnchem1392_MOESM2_ESM.mol [file 41557_2012_BFnchem1392_MOESM2_ESM.mol]

  ChemDraw06211206592D

 68 66  0  0  0  0  0  0  0  0999 V2000
   -0.2062   -0.8864    0.0000 C   0  0  0  0  0  0  0  0  0  0  0  0
    0.5040   -0.4623    0.0000 C   0  0  0  0  0  0  0  0  0  0  0  0
    0.4918    0.3649    0.0000 C   0  5  0  0  0  0  0  0  0  0  0  0
   -0.2306    0.7679    0.0000 C   0  0  0  0  0  0  0  0  0  0  0  0
   -0.9408    0.3438    0.0000 C   0  0  0  0  0  0  0  0  0  0  0  0
   -0.9286   -0.4833    0.0000 C   0  5  0  0  0  0  0  0  0  0  0  0
    3.7493   -1.6923    0.0000 C   0  0  0  0  0  0  0  0  0  0  0  0
    4.3098   -2.3014    0.0000 C   0  0  0  0  0  0  0  0  0  0  0  0
    4.0626   -3.0914    0.0000 C   0  0  0  0  0  0  0  0  0  0  0  0
    3.2548   -3.2723    0.0000 C   0  0  0  0  0  0  0  0  0  0  0  0
    2.6943   -2.6631    0.0000 C   0  0  0  0  0  0  0  0  0  0  0  0
    2.9415   -1.8731    0.0000 C   0  0  0  0  0  0  0  0  0  0  0  0
    2.3833   -1.2665    0.0000 O   0  5  0  0  0  0  0  0  0  0  0  0
    1.8897   -2.8433    0.0000 C   0  0  0  0  0  0  0  0  0  0  0  0
    1.6433   -3.6306    0.0000 C   0  0  0  0  0  0  0  0  0  0  0  0
    1.0847   -3.0235    0.0000 C   0  0  0  0  0  0  0  0  0  0  0  0
    1.3311   -2.2362    0.0000 C   0  0  0  0  0  0  0  0  0  0  0  0
    3.9956   -0.9055    0.0000 C   0  0  0  0  0  0  0  0  0  0  0  0
    3.4369   -0.2984    0.0000 C   0  0  0  0  0  0  0  0  0  0  0  0
    4.2420   -0.1181    0.0000 C   0  0  0  0  0  0  0  0  0  0  0  0
    4.8006   -0.7252    0.0000 C   0  0  0  0  0  0  0  0  0  0  0  0
   -3.9874    1.2013    0.0000 C   0  0  0  0  0  0  0  0  0  0  0  0
   -4.6549    1.6908    0.0000 C   0  0  0  0  0  0  0  0  0  0  0  0
   -4.5647    2.5137    0.0000 C   0  0  0  0  0  0  0  0  0  0  0  0
   -3.8070    2.8470    0.0000 C   0  0  0  0  0  0  0  0  0  0  0  0
   -3.1395    2.3575    0.0000 C   0  0  0  0  0  0  0  0  0  0  0  0
   -3.2297    1.5346    0.0000 C   0  0  0  0  0  0  0  0  0  0  0  0
   -2.5648    1.0471    0.0000 O   0  5  0  0  0  0  0  0  0  0  0  0
   -2.3849    2.6895    0.0000 C   0  0  0  0  0  0  0  0  0  0  0  0
   -2.2950    3.5096    0.0000 C   0  0  0  0  0  0  0  0  0  0  0  0
   -1.6297    3.0217    0.0000 C   0  0  0  0  0  0  0  0  0  0  0  0
   -1.7196    2.2016    0.0000 C   0  0  0  0  0  0  0  0  0  0  0  0
   -4.0772    0.3818    0.0000 C   0  0  0  0  0  0  0  0  0  0  0  0
   -3.4119   -0.1061    0.0000 C   0  0  0  0  0  0  0  0  0  0  0  0
   -4.1671   -0.4383    0.0000 C   0  0  0  0  0  0  0  0  0  0  0  0
   -4.8323    0.0496    0.0000 C   0  0  0  0  0  0  0  0  0  0  0  0
   -3.3349   -2.1818    0.0000 C   0  0  0  0  0  0  0  0  0  0  0  0
   -3.7595   -2.8925    0.0000 C   0  0  0  0  0  0  0  0  0  0  0  0
   -3.3563   -3.6154    0.0000 C   0  0  0  0  0  0  0  0  0  0  0  0
   -2.5286   -3.6278    0.0000 C   0  0  0  0  0  0  0  0  0  0  0  0
   -2.1041   -2.9172    0.0000 C   0  0  0  0  0  0  0  0  0  0  0  0
   -2.5072   -2.1942    0.0000 C   0  0  0  0  0  0  0  0  0  0  0  0
   -2.0844   -1.4865    0.0000 O   0  5  0  0  0  0  0  0  0  0  0  0
   -1.2797   -2.9295    0.0000 C   0  0  0  0  0  0  0  0  0  0  0  0
   -0.8779   -3.6501    0.0000 C   0  0  0  0  0  0  0  0  0  0  0  0
   -0.4548   -2.9418    0.0000 C   0  0  0  0  0  0  0  0  0  0  0  0
   -0.8566   -2.2213    0.0000 C   0  0  0  0  0  0  0  0  0  0  0  0
   -3.7364   -1.4618    0.0000 C   0  0  0  0  0  0  0  0  0  0  0  0
   -3.3133   -0.7535    0.0000 C   0  0  0  0  0  0  0  0  0  0  0  0
   -4.1382   -0.7412    0.0000 C   0  0  0  0  0  0  0  0  0  0  0  0
   -4.5613   -1.4494    0.0000 C   0  0  0  0  0  0  0  0  0  0  0  0
   -1.8141   -0.1267    0.0000 U   0  1  0  0  0  0  0  0  0  0  0  0
    3.7810    1.7118    0.0000 C   0  0  0  0  0  0  0  0  0  0  0  0
    4.3415    2.3209    0.0000 C   0  0  0  0  0  0  0  0  0  0  0  0
    4.0943    3.1109    0.0000 C   0  0  0  0  0  0  0  0  0  0  0  0
    3.2865    3.2917    0.0000 C   0  0  0  0  0  0  0  0  0  0  0  0
    2.7260    2.6826    0.0000 C   0  0  0  0  0  0  0  0  0  0  0  0
    2.9732    1.8926    0.0000 C   0  0  0  0  0  0  0  0  0  0  0  0
    2.4150    1.2859    0.0000 O   0  5  0  0  0  0  0  0  0  0  0  0
    1.9214    2.8627    0.0000 C   0  0  0  0  0  0  0  0  0  0  0  0
    1.6750    3.6501    0.0000 C   0  0  0  0  0  0  0  0  0  0  0  0
    1.1164    3.0430    0.0000 C   0  0  0  0  0  0  0  0  0  0  0  0
    1.3628    2.2557    0.0000 C   0  0  0  0  0  0  0  0  0  0  0  0
    4.0273    0.9249    0.0000 C   0  0  0  0  0  0  0  0  0  0  0  0
    3.4686    0.3179    0.0000 C   0  0  0  0  0  0  0  0  0  0  0  0
    4.2737    0.1376    0.0000 C   0  0  0  0  0  0  0  0  0  0  0  0
    4.8323    0.7447    0.0000 C   0  0  0  0  0  0  0  0  0  0  0  0
    1.2506   -0.1032    0.0000 U   0  1  0  0  0  0  0  0  0  0  0  0
  1  2  2  0      
  2  3  1  0      
  3  4  1  0      
  4  5  2  0      
  5  6  1  0      
  6  1  1  0      
  7  8  2  0      
  8  9  1  0      
  9 10  2  0      
 10 11  1  0      
 11 12  2  0      
 12  7  1  0      
 12 13  1  0      
 11 14  1  0      
  7 18  1  0      
 14 15  1  0      
 14 16  1  0      
 14 17  1  0      
 18 19  1  0      
 18 20  1  0      
 18 21  1  0      
 22 23  2  0      
 23 24  1  0      
 24 25  2  0      
 25 26  1  0      
 26 27  2  0      
 27 22  1  0      
 27 28  1  0      
 26 29  1  0      
 22 33  1  0      
 29 30  1  0      
 29 31  1  0      
 29 32  1  0      
 33 34  1  0      
 33 35  1  0      
 33 36  1  0      
 37 38  2  0      
 38 39  1  0      
 39 40  2  0      
 40 41  1  0      
 41 42  2  0      
 42 37  1  0      
 42 43  1  0      
 41 44  1  0      
 37 48  1  0      
 44 45  1  0      
 44 46  1  0      
 44 47  1  0      
 48 49  1  0      
 48 50  1  0      
 48 51  1  0      
 53 54  2  0      
 54 55  1  0      
 55 56  2  0      
 56 57  1  0      
 57 58  2  0      
 58 53  1  0      
 58 59  1  0      
 57 60  1  0      
 53 64  1  0      
 60 61  1  0      
 60 62  1  0      
 60 63  1  0      
 64 65  1  0      
 64 66  1  0      
 64 67  1  0      
M  CHG  8   3  -1   6  -1  13  -1  28  -1  43  -1  52   3  59  -1  68   3
M  END
