# Supplementary material for: Spontaneous reduction and C–H borylation of arenes mediated by uranium(III) disproportionation
Source: Springer Nature journal article supplement (doi:10.1038/nchem.1392), 2012-07-13
Supplement: 41557_2012_BFnchem1392_MOESM11_ESM.mol [file 41557_2012_BFnchem1392_MOESM11_ESM.mol]

  ChemDraw06211206592D

 45 39  0  0  0  0  0  0  0  0999 V2000
   -1.5808   -0.0657    0.0000 U   0  1  0  0  0  0  0  0  0  0  0  0
    1.4838   -0.0422    0.0000 U   0  1  0  0  0  0  0  0  0  0  0  0
    0.1573   -0.8453    0.0000 C   0  0  0  0  0  0  0  0  0  0  0  0
    0.8675   -0.4212    0.0000 C   0  0  0  0  0  0  0  0  0  0  0  0
    0.8554    0.4059    0.0000 C   0  5  0  0  0  0  0  0  0  0  0  0
    0.1330    0.8090    0.0000 C   0  0  0  0  0  0  0  0  0  0  0  0
   -0.5773    0.3848    0.0000 C   0  0  0  0  0  0  0  0  0  0  0  0
   -0.5651   -0.4423    0.0000 C   0  5  0  0  0  0  0  0  0  0  0  0
    0.1208    1.6333    0.0000 C   0  0  0  0  0  0  0  0  0  0  0  0
   -2.4899    1.1474    0.0000 N   0  5  0  0  0  0  0  0  0  0  0  0
   -2.6461    2.0197    0.0000 Si  0  0  0  0  0  0  0  0  0  0  0  0
   -3.3617    2.4303    0.0000 C   0  0  0  0  0  0  0  0  0  0  0  0
   -2.6963    2.8432    0.0000 C   0  0  0  0  0  0  0  0  0  0  0  0
   -1.9857    2.5142    0.0000 C   0  0  0  0  0  0  0  0  0  0  0  0
   -3.3585    1.2400    0.0000 Si  0  0  0  0  0  0  0  0  0  0  0  0
   -3.8049    0.5462    0.0000 C   0  0  0  0  0  0  0  0  0  0  0  0
   -4.1834    1.2317    0.0000 C   0  0  0  0  0  0  0  0  0  0  0  0
   -3.8187    1.9247    0.0000 C   0  0  0  0  0  0  0  0  0  0  0  0
    2.4582   -1.1662    0.0000 N   0  5  0  0  0  0  0  0  0  0  0  0
    2.6144   -2.0386    0.0000 Si  0  0  0  0  0  0  0  0  0  0  0  0
    3.3300   -2.4491    0.0000 C   0  0  0  0  0  0  0  0  0  0  0  0
    2.6646   -2.8620    0.0000 C   0  0  0  0  0  0  0  0  0  0  0  0
    1.9540   -2.5330    0.0000 C   0  0  0  0  0  0  0  0  0  0  0  0
    3.3268   -1.2589    0.0000 Si  0  0  0  0  0  0  0  0  0  0  0  0
    3.7732   -0.5651    0.0000 C   0  0  0  0  0  0  0  0  0  0  0  0
    4.1517   -1.2506    0.0000 C   0  0  0  0  0  0  0  0  0  0  0  0
    3.7870   -1.9436    0.0000 C   0  0  0  0  0  0  0  0  0  0  0  0
   -2.0094   -1.3862    0.0000 N   0  5  0  0  0  0  0  0  0  0  0  0
   -2.1657   -2.2586    0.0000 Si  0  0  0  0  0  0  0  0  0  0  0  0
   -2.8813   -2.6691    0.0000 C   0  0  0  0  0  0  0  0  0  0  0  0
   -2.2159   -3.0820    0.0000 C   0  0  0  0  0  0  0  0  0  0  0  0
   -1.5053   -2.7530    0.0000 C   0  0  0  0  0  0  0  0  0  0  0  0
   -2.8780   -1.4789    0.0000 Si  0  0  0  0  0  0  0  0  0  0  0  0
   -3.3244   -0.7851    0.0000 C   0  0  0  0  0  0  0  0  0  0  0  0
   -3.7030   -1.4706    0.0000 C   0  0  0  0  0  0  0  0  0  0  0  0
   -3.3383   -2.1636    0.0000 C   0  0  0  0  0  0  0  0  0  0  0  0
    2.4899    1.3862    0.0000 N   0  5  0  0  0  0  0  0  0  0  0  0
    2.6461    2.2586    0.0000 Si  0  0  0  0  0  0  0  0  0  0  0  0
    3.3617    2.6691    0.0000 C   0  0  0  0  0  0  0  0  0  0  0  0
    2.6963    3.0820    0.0000 C   0  0  0  0  0  0  0  0  0  0  0  0
    1.9857    2.7530    0.0000 C   0  0  0  0  0  0  0  0  0  0  0  0
    3.3585    1.4789    0.0000 Si  0  0  0  0  0  0  0  0  0  0  0  0
    3.8049    0.7851    0.0000 C   0  0  0  0  0  0  0  0  0  0  0  0
    4.1834    1.4706    0.0000 C   0  0  0  0  0  0  0  0  0  0  0  0
    3.8187    2.1636    0.0000 C   0  0  0  0  0  0  0  0  0  0  0  0
  3  4  2  0      
  4  5  1  0      
  5  6  1  0      
  6  7  2  0      
  7  8  1  0      
  8  3  1  0      
  6  9  1  0      
 11 10  1  0      
 10 15  1  0      
 11 12  1  0      
 11 13  1  0      
 11 14  1  0      
 15 16  1  0      
 15 17  1  0      
 15 18  1  0      
 20 19  1  0      
 19 24  1  0      
 20 21  1  0      
 20 22  1  0      
 20 23  1  0      
 24 25  1  0      
 24 26  1  0      
 24 27  1  0      
 29 28  1  0      
 28 33  1  0      
 29 30  1  0      
 29 31  1  0      
 29 32  1  0      
 33 34  1  0      
 33 35  1  0      
 33 36  1  0      
 38 37  1  0      
 37 42  1  0      
 38 39  1  0      
 38 40  1  0      
 38 41  1  0      
 42 43  1  0      
 42 44  1  0      
 42 45  1  0      
M  CHG  8   1   3   2   3   5  -1   8  -1  10  -1  19  -1  28  -1  37  -1
M  END
