# Supplementary material for: Spontaneous reduction and C–H borylation of arenes mediated by uranium(III) disproportionation
Source: Springer Nature journal article supplement (doi:10.1038/nchem.1392), 2012-07-13
Supplement: 41557_2012_BFnchem1392_MOESM13_ESM.cif [file 41557_2012_BFnchem1392_MOESM13_ESM.cif]

#==============================================================================

# SUBMISSION DETAILS

_publ_contact_author_name             'Polly L Arnold'
_publ_contact_author_email            'Polly.Arnold@ed.ac.uk'
_publ_contact_author_fax              '+44 131 650 6453'
_publ_contact_author_phone            '+44 131 650 5429'
_publ_requested_journal               'Nature Chemistry'

#==============================================================================

# TITLE AND AUTHOR LIST

_publ_section_title
;
Spontaneous reduction and C-H borylation of arenes mediated by 
uranium(III) disproportionation
;
_publ_section_title_footnote
;
CCDC number 855808
;
loop_
_publ_author_name
;
Polly L. Arnold, Stephen M. Mansell, Laurent Maron and David McKay
;
_publ_author_address
;
EaStCHEM School of Chemistry,
Joseph Black Building, University of Edinburgh,
The King's Buildings, Edinburgh, EH9 3JJ, UK.
;

#==============================================================================

data_(DtbpO)2U(biphenyl)U(ODtbp)2_complex_3 
 
_audit_creation_method            SHELXL-97 
_chemical_name_systematic 
; 
 ? 
; 
_chemical_name_common             ? 
_chemical_melting_point           ? 
_chemical_formula_moiety          'C68 H94 O4 U2' 
_chemical_formula_sum 
 'C68 H94 O4 U2' 
_chemical_formula_weight          1451.49 
 
loop_ 
 _atom_type_symbol 
 _atom_type_description 
 _atom_type_scat_dispersion_real 
 _atom_type_scat_dispersion_imag 
 _atom_type_scat_source 
 'C'  'C'   0.0033   0.0016 
 'International Tables Vol C Tables 4.2.6.8 and 6.1.1.4' 
 'H'  'H'   0.0000   0.0000 
 'International Tables Vol C Tables 4.2.6.8 and 6.1.1.4' 
 'O'  'O'   0.0106   0.0060 
 'International Tables Vol C Tables 4.2.6.8 and 6.1.1.4' 
 'U'  'U'  -9.6767   9.6646 
 'International Tables Vol C Tables 4.2.6.8 and 6.1.1.4' 
 
_symmetry_cell_setting            Monoclinic
_symmetry_space_group_name_H-M    'C2/c'

_symmetry-space-group-name_Hall   '-C 2yc'
 
loop_ 
 _symmetry_equiv_pos_as_xyz 
 'x, y, z' 
 '-x, y, -z+1/2' 
 'x+1/2, y+1/2, z' 
 '-x+1/2, y+1/2, -z+1/2' 
 '-x, -y, -z' 
 'x, -y, z-1/2' 
 '-x+1/2, -y+1/2, -z' 
 'x+1/2, -y+1/2, z-1/2' 
 
_cell_length_a                    25.9066(18) 
_cell_length_b                    13.8525(6) 
_cell_length_c                    17.9287(12) 
_cell_angle_alpha                 90.00 
_cell_angle_beta                  108.504(7) 
_cell_angle_gamma                 90.00 
_cell_volume                      6101.5(6) 
_cell_formula_units_Z             4 
_cell_measurement_temperature     170(2) 
_cell_measurement_reflns_used   8019
_cell_measurement_theta_min     3.1328
_cell_measurement_theta_max     29.9642
 
_exptl_crystal_description        Prism
_exptl_crystal_colour             Black
_exptl_crystal_size_max           0.225
_exptl_crystal_size_mid           0.175
_exptl_crystal_size_min           0.104
_exptl_crystal_density_meas       ? 
_exptl_crystal_density_diffrn     1.580 
_exptl_crystal_density_method     'not measured' 
_exptl_crystal_F_000              2872 
_exptl_absorpt_coefficient_mu     5.348 
_exptl_absorpt_correction_T_min                   0.75669
_exptl_absorpt_correction_T_max                   1.00000
_exptl_absorpt_correction_type            'multi-scan'
_exptl_absorpt_process_details
;
CrysAlisPro, Agilent Technologies,
Version 1.171.34.49 (release 20-01-2011 CrysAlis171 .NET)
(compiled Jan 20 2011,15:58:25)
Empirical absorption correction using spherical harmonics,
 implemented in SCALE3 ABSPACK scaling algorithm.
;
 
_exptl_special_details 
; 
 ? 
; 
 
_diffrn_ambient_temperature       170(2) 
_diffrn_radiation_wavelength      0.71073 
_diffrn_radiation_type            MoK\a 
_diffrn_radiation_source 'Enhance (Mo) X-ray Source'
_diffrn_radiation_monochromator 'graphite'
_diffrn_measurement_device_type 'Xcalibur, Eos'
_diffrn_measurement_method        '\w scans'
_diffrn_detector_area_resol_mean  16.1042
_diffrn_standards_number          0
_diffrn_standards_interval_count  ? 
_diffrn_standards_interval_time   ? 
_diffrn_standards_decay_%         ? 
_diffrn_reflns_number             25882 
_diffrn_reflns_av_R_equivalents   0.0433 
_diffrn_reflns_av_sigmaI/netI     0.0474 
_diffrn_reflns_limit_h_min        -32 
_diffrn_reflns_limit_h_max        33 
_diffrn_reflns_limit_k_min        -17 
_diffrn_reflns_limit_k_max        17 
_diffrn_reflns_limit_l_min        -23 
_diffrn_reflns_limit_l_max        23 
_diffrn_reflns_theta_min          3.14 
_diffrn_reflns_theta_max          27.50 
_reflns_number_total              6991 
_reflns_number_gt                 4344 
_reflns_threshold_expression      >2sigma(I) 
 
_computing_data_collection
;
CrysAlisPro, Agilent Technologies,
Version 1.171.34.49 (release 20-01-2011 CrysAlis171 .NET)
(compiled Jan 20 2011,15:58:25)
;
_computing_cell_refinement
;
CrysAlisPro, Agilent Technologies,
Version 1.171.34.49 (release 20-01-2011 CrysAlis171 .NET)
(compiled Jan 20 2011,15:58:25)
;
_computing_data_reduction
;
CrysAlisPro, Agilent Technologies,
Version 1.171.34.49 (release 20-01-2011 CrysAlis171 .NET)
(compiled Jan 20 2011,15:58:25)
;
_computing_structure_solution     'SHELXS-97 (Sheldrick, 1990)' 
_computing_structure_refinement   'SHELXL-97 (Sheldrick, 1997)' 
_computing_molecular_graphics     ? 
_computing_publication_material   ? 
 
_refine_special_details 
; 
 Refinement of F^2^ against ALL reflections.  The weighted R-factor wR and 
 goodness of fit S are based on F^2^, conventional R-factors R are based 
 on F, with F set to zero for negative F^2^. The threshold expression of 
 F^2^ > 2sigma(F^2^) is used only for calculating R-factors(gt) etc. and is 
 not relevant to the choice of reflections for refinement.  R-factors based 
 on F^2^ are statistically about twice as large as those based on F, and R- 
 factors based on ALL data will be even larger.
There is disorder in the phenyl substituent that was modelled over two
positions restraining the ring to being a regular hexagon in shape.
; 
 
_refine_ls_structure_factor_coef  Fsqd  
_refine_ls_matrix_type            full 
_refine_ls_weighting_scheme       calc  
_refine_ls_weighting_details 
 'calc w=1/[\s^2^(Fo^2^)+(0.0231P)^2^+12.9161P] where P=(Fo^2^+2Fc^2^)/3' 
_atom_sites_solution_primary      direct 
_atom_sites_solution_secondary    difmap 
_atom_sites_solution_hydrogens    geom 
_refine_ls_hydrogen_treatment     constr 
_refine_ls_extinction_method      none 
_refine_ls_extinction_coef        ? 
_refine_ls_number_reflns          6991 
_refine_ls_number_parameters      363 
_refine_ls_number_restraints      0 
_refine_ls_R_factor_all           0.0671 
_refine_ls_R_factor_gt            0.0308 
_refine_ls_wR_factor_ref          0.0696 
_refine_ls_wR_factor_gt           0.0573 
_refine_ls_goodness_of_fit_ref    0.998 
_refine_ls_restrained_S_all       0.998 
_refine_ls_shift/su_max           0.001 
_refine_ls_shift/su_mean          0.000 
 
loop_ 
 _atom_site_label 
 _atom_site_type_symbol 
 _atom_site_fract_x 
 _atom_site_fract_y 
 _atom_site_fract_z 
 _atom_site_U_iso_or_equiv 
 _atom_site_adp_type 
 _atom_site_occupancy 
 _atom_site_symmetry_multiplicity 
 _atom_site_calc_flag 
 _atom_site_refinement_flags 
 _atom_site_disorder_assembly 
 _atom_site_disorder_group 
U1 U 0.068161(6) 0.252436(14) 0.355949(9) 0.02534(6) Uani 1 1 d . . . 
O1 O 0.13555(13) 0.1538(2) 0.39774(18) 0.0307(8) Uani 1 1 d . . . 
O2 O 0.09711(13) 0.3657(2) 0.43877(18) 0.0299(8) Uani 1 1 d . . . 
C1 C 0.0000 0.3556(5) 0.2500 0.035(2) Uani 1 2 d S . . 
H1 H 0.0000 0.4242 0.2500 0.042 Uiso 1 2 calc SR . . 
C2 C 0.03321(19) 0.3049(4) 0.2137(3) 0.0350(13) Uani 1 1 d . . . 
H2 H 0.0573 0.3392 0.1929 0.042 Uiso 1 1 calc R . . 
C3 C 0.03028(19) 0.2002(4) 0.2086(3) 0.0286(12) Uani 1 1 d . . . 
H3 H 0.0484 0.1671 0.1777 0.034 Uiso 1 1 calc R . . 
C4 C 0.0000 0.1456(5) 0.2500 0.0285(17) Uani 1 2 d S . . 
C5 C 0.0068(8) 0.0381(4) 0.2465(18) 0.033(4) Uani 0.50 1 d PG . . 
C6 C 0.0534(6) -0.0035(7) 0.2392(13) 0.034(4) Uani 0.50 1 d PG . . 
H6 H 0.0820 0.0362 0.2339 0.041 Uiso 0.50 1 calc PR . . 
C7 C 0.0586(4) -0.1028(7) 0.2396(8) 0.057(4) Uani 0.50 1 d PG . . 
H7 H 0.0906 -0.1314 0.2346 0.068 Uiso 0.50 1 calc PR . . 
C8 C 0.0171(5) -0.1605(5) 0.2474(11) 0.064(7) Uani 0.50 1 d PG . . 
H8 H 0.0206 -0.2288 0.2477 0.077 Uiso 0.50 1 calc PR . . 
C9 C -0.0296(5) -0.1189(7) 0.2547(9) 0.054(5) Uani 0.50 1 d PG . . 
H9 H -0.0581 -0.1586 0.2600 0.065 Uiso 0.50 1 calc PR . . 
C10 C -0.0347(6) -0.0196(7) 0.2542(13) 0.049(5) Uani 0.50 1 d PG . . 
H10 H -0.0668 0.0090 0.2593 0.059 Uiso 0.50 1 calc PR . . 
C11 C 0.1579(2) 0.0662(3) 0.3910(3) 0.0301(11) Uani 1 1 d . . . 
C12 C 0.1438(2) -0.0157(4) 0.4275(3) 0.0374(13) Uani 1 1 d . . . 
C13 C 0.1617(3) -0.1044(4) 0.4104(4) 0.0613(18) Uani 1 1 d . . . 
H13 H 0.1521 -0.1609 0.4331 0.074 Uiso 1 1 calc R . . 
C14 C 0.1932(3) -0.1133(4) 0.3615(4) 0.072(2) Uani 1 1 d . . . 
H14 H 0.2031 -0.1755 0.3484 0.086 Uiso 1 1 calc R . . 
C15 C 0.2100(3) -0.0331(4) 0.3321(4) 0.0562(17) Uani 1 1 d . . . 
H15 H 0.2331 -0.0404 0.3006 0.067 Uiso 1 1 calc R . . 
C16 C 0.1944(2) 0.0596(4) 0.3467(3) 0.0350(12) Uani 1 1 d . . . 
C17 C 0.1132(2) -0.0085(4) 0.4880(3) 0.0419(14) Uani 1 1 d . . . 
C18 C 0.0580(2) 0.0400(6) 0.4563(4) 0.091(3) Uani 1 1 d . . . 
H18A H 0.0378 0.0311 0.4935 0.137 Uiso 1 1 calc R . . 
H18B H 0.0377 0.0111 0.4056 0.137 Uiso 1 1 calc R . . 
H18C H 0.0631 0.1091 0.4492 0.137 Uiso 1 1 calc R . . 
C20 C 0.1478(2) 0.0454(5) 0.5598(3) 0.0574(17) Uani 1 1 d . . . 
H20A H 0.1545 0.1111 0.5447 0.086 Uiso 1 1 calc R . . 
H20B H 0.1826 0.0118 0.5822 0.086 Uiso 1 1 calc R . . 
H20C H 0.1287 0.0484 0.5990 0.086 Uiso 1 1 calc R . . 
C19 C 0.1017(4) -0.1081(5) 0.5169(5) 0.108(3) Uani 1 1 d . . . 
H19A H 0.1362 -0.1418 0.5415 0.162 Uiso 1 1 calc R . . 
H19B H 0.0792 -0.1459 0.4722 0.162 Uiso 1 1 calc R . . 
H19C H 0.0824 -0.1000 0.5555 0.162 Uiso 1 1 calc R . . 
C21 C 0.2195(2) 0.1489(4) 0.3204(3) 0.0348(12) Uani 1 1 d . . . 
C22 C 0.1777(2) 0.2135(4) 0.2644(3) 0.0527(16) Uani 1 1 d . . . 
H22A H 0.1556 0.2451 0.2927 0.079 Uiso 1 1 calc R . . 
H22B H 0.1542 0.1745 0.2213 0.079 Uiso 1 1 calc R . . 
H22C H 0.1963 0.2625 0.2429 0.079 Uiso 1 1 calc R . . 
C24 C 0.2517(2) 0.2046(4) 0.3939(3) 0.0418(13) Uani 1 1 d . . . 
H24A H 0.2652 0.2650 0.3784 0.063 Uiso 1 1 calc R . . 
H24B H 0.2825 0.1654 0.4249 0.063 Uiso 1 1 calc R . . 
H24C H 0.2280 0.2192 0.4255 0.063 Uiso 1 1 calc R . . 
C23 C 0.2598(2) 0.1202(4) 0.2775(3) 0.0565(17) Uani 1 1 d . . . 
H23A H 0.2410 0.0808 0.2315 0.085 Uiso 1 1 calc R . . 
H23B H 0.2897 0.0829 0.3131 0.085 Uiso 1 1 calc R . . 
H23C H 0.2744 0.1784 0.2605 0.085 Uiso 1 1 calc R . . 
C25 C 0.10771(19) 0.4390(3) 0.4920(3) 0.0285(11) Uani 1 1 d . . . 
C26 C 0.0865(2) 0.4351(4) 0.5552(3) 0.0367(12) Uani 1 1 d . . . 
C27 C 0.0997(2) 0.5102(4) 0.6096(3) 0.0503(15) Uani 1 1 d . . . 
H27 H 0.0862 0.5084 0.6530 0.060 Uiso 1 1 calc R . . 
C28 C 0.1311(3) 0.5854(5) 0.6028(4) 0.0607(19) Uani 1 1 d . . . 
H28 H 0.1397 0.6349 0.6415 0.073 Uiso 1 1 calc R . . 
C29 C 0.1507(2) 0.5902(4) 0.5395(3) 0.0504(15) Uani 1 1 d . . . 
H29 H 0.1720 0.6443 0.5349 0.060 Uiso 1 1 calc R . . 
C30 C 0.1401(2) 0.5180(3) 0.4822(3) 0.0327(12) Uani 1 1 d . . . 
C31 C 0.0521(2) 0.3515(4) 0.5693(3) 0.0426(14) Uani 1 1 d . . . 
C32 C 0.0071(3) 0.3230(7) 0.4956(4) 0.134(4) Uani 1 1 d . . . 
H32A H 0.0160 0.2610 0.4764 0.201 Uiso 1 1 calc R . . 
H32B H 0.0032 0.3725 0.4551 0.201 Uiso 1 1 calc R . . 
H32C H -0.0272 0.3171 0.5074 0.201 Uiso 1 1 calc R . . 
C33 C 0.0887(3) 0.2703(5) 0.6054(6) 0.103(3) Uani 1 1 d . . . 
H33A H 0.0669 0.2134 0.6081 0.154 Uiso 1 1 calc R . . 
H33B H 0.1113 0.2884 0.6586 0.154 Uiso 1 1 calc R . . 
H33C H 0.1121 0.2553 0.5734 0.154 Uiso 1 1 calc R . . 
C34 C 0.0203(3) 0.3778(5) 0.6240(5) 0.088(3) Uani 1 1 d . . . 
H34A H -0.0037 0.3242 0.6266 0.131 Uiso 1 1 calc R . . 
H34B H -0.0016 0.4356 0.6042 0.131 Uiso 1 1 calc R . . 
H34C H 0.0456 0.3907 0.6766 0.131 Uiso 1 1 calc R . . 
C35 C 0.1627(2) 0.5259(4) 0.4134(3) 0.0371(13) Uani 1 1 d . . . 
C36 C 0.1169(2) 0.5326(5) 0.3371(3) 0.0652(19) Uani 1 1 d . . . 
H36A H 0.1319 0.5379 0.2935 0.098 Uiso 1 1 calc R . . 
H36B H 0.0948 0.5897 0.3379 0.098 Uiso 1 1 calc R . . 
H36C H 0.0942 0.4746 0.3301 0.098 Uiso 1 1 calc R . . 
C37 C 0.1999(2) 0.4418(4) 0.4131(4) 0.0543(16) Uani 1 1 d . . . 
H37A H 0.1802 0.3811 0.4119 0.081 Uiso 1 1 calc R . . 
H37B H 0.2317 0.4440 0.4606 0.081 Uiso 1 1 calc R . . 
H37C H 0.2118 0.4457 0.3664 0.081 Uiso 1 1 calc R . . 
C38 C 0.1979(3) 0.6160(4) 0.4192(4) 0.0648(19) Uani 1 1 d . . . 
H38A H 0.2119 0.6179 0.3745 0.097 Uiso 1 1 calc R . . 
H38B H 0.2284 0.6141 0.4684 0.097 Uiso 1 1 calc R . . 
H38C H 0.1759 0.6737 0.4185 0.097 Uiso 1 1 calc R . . 
 
loop_ 
 _atom_site_aniso_label 
 _atom_site_aniso_U_11 
 _atom_site_aniso_U_22 
 _atom_site_aniso_U_33 
 _atom_site_aniso_U_23 
 _atom_site_aniso_U_13 
 _atom_site_aniso_U_12 
U1 0.02371(9) 0.02499(9) 0.02337(8) -0.00202(10) 0.00188(6) 0.00209(11) 
O1 0.0271(19) 0.0336(19) 0.0333(19) 0.0073(15) 0.0120(15) 0.0078(15) 
O2 0.0311(19) 0.0295(18) 0.0278(18) -0.0067(14) 0.0073(14) -0.0011(15) 
C1 0.028(5) 0.021(4) 0.042(5) 0.000 -0.010(4) 0.000 
C2 0.022(3) 0.044(3) 0.035(3) 0.014(3) 0.004(2) -0.007(3) 
C3 0.028(3) 0.035(3) 0.023(3) -0.003(2) 0.007(2) 0.005(2) 
C4 0.033(5) 0.022(4) 0.026(4) 0.000 0.003(3) 0.000 
C5 0.043(11) 0.027(4) 0.024(6) -0.004(8) 0.003(7) -0.016(8) 
C6 0.034(9) 0.021(6) 0.038(8) -0.009(5) -0.002(7) 0.004(5) 
C7 0.078(13) 0.040(8) 0.045(8) -0.013(6) 0.010(8) 0.018(8) 
C8 0.13(2) 0.018(6) 0.045(7) -0.004(8) 0.024(12) -0.011(9) 
C9 0.091(14) 0.020(8) 0.047(9) 0.002(7) 0.014(10) -0.015(8) 
C10 0.058(15) 0.034(8) 0.053(9) 0.011(7) 0.014(10) -0.002(7) 
C11 0.030(3) 0.027(3) 0.031(3) 0.001(2) 0.006(2) 0.003(2) 
C12 0.043(3) 0.034(3) 0.037(3) 0.003(2) 0.016(3) 0.001(3) 
C13 0.081(5) 0.034(3) 0.081(5) 0.006(3) 0.043(4) -0.005(3) 
C14 0.110(6) 0.029(3) 0.097(6) -0.004(3) 0.064(5) 0.011(4) 
C15 0.076(5) 0.040(3) 0.069(4) -0.005(3) 0.046(4) 0.006(3) 
C16 0.042(3) 0.033(3) 0.034(3) 0.001(2) 0.017(2) 0.003(2) 
C17 0.043(4) 0.043(3) 0.041(3) 0.014(3) 0.017(3) -0.002(3) 
C18 0.042(4) 0.186(9) 0.050(4) 0.042(5) 0.020(3) 0.008(5) 
C20 0.042(4) 0.092(5) 0.040(4) -0.005(3) 0.016(3) -0.001(3) 
C19 0.173(9) 0.066(5) 0.130(8) 0.004(5) 0.113(7) -0.032(6) 
C21 0.033(3) 0.040(3) 0.034(3) 0.004(2) 0.016(2) 0.004(2) 
C22 0.035(3) 0.065(4) 0.056(4) 0.027(3) 0.012(3) -0.003(3) 
C24 0.035(3) 0.042(3) 0.049(3) 0.003(3) 0.014(3) -0.006(3) 
C23 0.059(4) 0.066(4) 0.059(4) -0.003(3) 0.039(3) -0.007(3) 
C25 0.024(3) 0.028(3) 0.030(3) -0.007(2) 0.005(2) 0.003(2) 
C26 0.033(3) 0.047(3) 0.029(3) -0.006(2) 0.007(2) 0.000(3) 
C27 0.046(4) 0.069(4) 0.044(3) -0.019(3) 0.024(3) -0.010(3) 
C28 0.064(4) 0.067(4) 0.058(4) -0.041(3) 0.029(3) -0.016(4) 
C29 0.050(4) 0.043(3) 0.061(4) -0.022(3) 0.022(3) -0.013(3) 
C30 0.032(3) 0.028(3) 0.038(3) -0.005(2) 0.011(2) 0.004(2) 
C31 0.043(3) 0.058(4) 0.029(3) -0.006(3) 0.016(2) -0.010(3) 
C32 0.129(8) 0.201(10) 0.068(5) -0.014(6) 0.024(5) -0.135(8) 
C33 0.064(5) 0.065(5) 0.194(10) 0.050(5) 0.062(6) 0.007(4) 
C34 0.090(6) 0.088(6) 0.115(7) 0.000(5) 0.075(5) -0.010(5) 
C35 0.040(3) 0.032(3) 0.042(3) 0.000(2) 0.016(3) -0.003(3) 
C36 0.060(4) 0.095(5) 0.039(4) 0.018(3) 0.013(3) -0.002(4) 
C37 0.052(4) 0.054(4) 0.068(4) 0.001(3) 0.035(3) 0.001(3) 
C38 0.080(5) 0.054(4) 0.076(5) -0.006(3) 0.047(4) -0.020(4) 
 
_geom_special_details 
; 
 All esds (except the esd in the dihedral angle between two l.s. planes) 
 are estimated using the full covariance matrix.  The cell esds are taken 
 into account individually in the estimation of esds in distances, angles 
 and torsion angles; correlations between esds in cell parameters are only 
 used when they are defined by crystal symmetry.  An approximate (isotropic) 
 treatment of cell esds is used for estimating esds involving l.s. planes. 
; 
 
loop_ 
 _geom_bond_atom_site_label_1 
 _geom_bond_atom_site_label_2 
 _geom_bond_distance 
 _geom_bond_site_symmetry_2 
 _geom_bond_publ_flag 
U1 O2 2.127(3) . ? 
U1 O1 2.155(3) . ? 
U1 C2 2.527(5) . ? 
U1 C3 2.548(5) 2 ? 
U1 C1 2.577(4) . ? 
U1 C4 2.606(4) . ? 
U1 C3 2.612(5) . ? 
U1 C2 2.627(5) 2 ? 
O1 C11 1.367(5) . ? 
O2 C25 1.360(5) . ? 
C1 C2 1.419(6) 2 ? 
C1 C2 1.419(6) . ? 
C1 U1 2.577(4) 2 ? 
C1 H1 0.9500 . ? 
C2 C3 1.454(6) . ? 
C2 U1 2.627(5) 2 ? 
C2 H2 0.9500 . ? 
C3 C4 1.452(6) . ? 
C3 U1 2.548(5) 2 ? 
C3 H3 0.9500 . ? 
C4 C3 1.452(6) 2 ? 
C4 C5 1.502(8) 2 ? 
C4 C5 1.502(8) . ? 
C4 U1 2.606(4) 2 ? 
C5 C6 1.382(4) . ? 
C5 C10 1.382(4) . ? 
C6 C7 1.382(4) . ? 
C6 H6 0.9500 . ? 
C7 C8 1.382(4) . ? 
C7 H7 0.9500 . ? 
C8 C9 1.382(4) . ? 
C8 H8 0.9500 . ? 
C9 C10 1.382(4) . ? 
C9 H9 0.9500 . ? 
C10 H10 0.9500 . ? 
C11 C12 1.414(7) . ? 
C11 C16 1.418(7) . ? 
C12 C13 1.383(7) . ? 
C12 C17 1.535(7) . ? 
C13 C14 1.379(8) . ? 
C13 H13 0.9500 . ? 
C14 C15 1.359(8) . ? 
C14 H14 0.9500 . ? 
C15 C16 1.395(7) . ? 
C15 H15 0.9500 . ? 
C16 C21 1.540(7) . ? 
C17 C20 1.511(7) . ? 
C17 C18 1.517(8) . ? 
C17 C19 1.535(8) . ? 
C18 H18A 0.9800 . ? 
C18 H18B 0.9800 . ? 
C18 H18C 0.9800 . ? 
C20 H20A 0.9800 . ? 
C20 H20B 0.9800 . ? 
C20 H20C 0.9800 . ? 
C19 H19A 0.9800 . ? 
C19 H19B 0.9800 . ? 
C19 H19C 0.9800 . ? 
C21 C22 1.513(7) . ? 
C21 C24 1.525(7) . ? 
C21 C23 1.532(7) . ? 
C22 H22A 0.9800 . ? 
C22 H22B 0.9800 . ? 
C22 H22C 0.9800 . ? 
C24 H24A 0.9800 . ? 
C24 H24B 0.9800 . ? 
C24 H24C 0.9800 . ? 
C23 H23A 0.9800 . ? 
C23 H23B 0.9800 . ? 
C23 H23C 0.9800 . ? 
C25 C26 1.410(7) . ? 
C25 C30 1.423(7) . ? 
C26 C27 1.391(7) . ? 
C26 C31 1.529(7) . ? 
C27 C28 1.351(8) . ? 
C27 H27 0.9500 . ? 
C28 C29 1.384(8) . ? 
C28 H28 0.9500 . ? 
C29 C30 1.397(7) . ? 
C29 H29 0.9500 . ? 
C30 C35 1.528(7) . ? 
C31 C33 1.482(8) . ? 
C31 C32 1.512(8) . ? 
C31 C34 1.512(7) . ? 
C32 H32A 0.9800 . ? 
C32 H32B 0.9800 . ? 
C32 H32C 0.9800 . ? 
C33 H33A 0.9800 . ? 
C33 H33B 0.9800 . ? 
C33 H33C 0.9800 . ? 
C34 H34A 0.9800 . ? 
C34 H34B 0.9800 . ? 
C34 H34C 0.9800 . ? 
C35 C36 1.501(7) . ? 
C35 C37 1.514(7) . ? 
C35 C38 1.529(7) . ? 
C36 H36A 0.9800 . ? 
C36 H36B 0.9800 . ? 
C36 H36C 0.9800 . ? 
C37 H37A 0.9800 . ? 
C37 H37B 0.9800 . ? 
C37 H37C 0.9800 . ? 
C38 H38A 0.9800 . ? 
C38 H38B 0.9800 . ? 
C38 H38C 0.9800 . ? 
 
loop_ 
 _geom_angle_atom_site_label_1 
 _geom_angle_atom_site_label_2 
 _geom_angle_atom_site_label_3 
 _geom_angle 
 _geom_angle_site_symmetry_1 
 _geom_angle_site_symmetry_3 
 _geom_angle_publ_flag 
O2 U1 O1 99.08(12) . . ? 
O2 U1 C2 115.25(15) . . ? 
O1 U1 C2 121.63(15) . . ? 
O2 U1 C3 127.37(14) . 2 ? 
O1 U1 C3 124.14(14) . 2 ? 
C2 U1 C3 68.72(14) . 2 ? 
O2 U1 C1 96.48(15) . . ? 
O1 U1 C1 153.87(9) . . ? 
C2 U1 C1 32.26(12) . . ? 
C3 U1 C1 57.99(15) 2 . ? 
O2 U1 C4 159.30(12) . . ? 
O1 U1 C4 100.37(14) . . ? 
C2 U1 C4 58.99(15) . . ? 
C3 U1 C4 32.71(11) 2 . ? 
C1 U1 C4 68.31(15) . . ? 
O2 U1 C3 147.87(14) . . ? 
O1 U1 C3 100.30(14) . . ? 
C2 U1 C3 32.81(14) . . ? 
C3 U1 C3 57.41(19) 2 . ? 
C1 U1 C3 57.21(14) . . ? 
C4 U1 C3 32.32(11) . . ? 
O2 U1 C2 101.87(14) . 2 ? 
O1 U1 C2 156.59(15) . 2 ? 
C2 U1 C2 57.1(2) . 2 ? 
C3 U1 C2 32.58(14) 2 2 ? 
C1 U1 C2 31.62(13) . 2 ? 
C4 U1 C2 57.76(14) . 2 ? 
C3 U1 C2 66.27(14) . 2 ? 
C11 O1 U1 148.4(3) . . ? 
C25 O2 U1 171.3(3) . . ? 
C2 C1 C2 120.6(6) 2 . ? 
C2 C1 U1 71.9(3) 2 2 ? 
C2 C1 U1 76.2(3) . 2 ? 
C2 C1 U1 76.2(3) 2 . ? 
C2 C1 U1 71.9(3) . . ? 
U1 C1 U1 112.6(3) 2 . ? 
C2 C1 H1 119.7 2 . ? 
C2 C1 H1 119.7 . . ? 
U1 C1 H1 123.7 2 . ? 
U1 C1 H1 123.7 . . ? 
C1 C2 C3 119.7(5) . . ? 
C1 C2 U1 75.8(2) . . ? 
C3 C2 U1 76.8(3) . . ? 
C1 C2 U1 72.2(2) . 2 ? 
C3 C2 U1 70.7(3) . 2 ? 
U1 C2 U1 112.60(18) . 2 ? 
C1 C2 H2 120.1 . . ? 
C3 C2 H2 120.1 . . ? 
U1 C2 H2 118.1 . . ? 
U1 C2 H2 129.3 2 . ? 
C4 C3 C2 120.9(5) . . ? 
C4 C3 U1 75.8(2) . 2 ? 
C2 C3 U1 76.7(3) . 2 ? 
C4 C3 U1 73.6(2) . . ? 
C2 C3 U1 70.4(3) . . ? 
U1 C3 U1 112.41(18) 2 . ? 
C4 C3 H3 119.6 . . ? 
C2 C3 H3 119.6 . . ? 
U1 C3 H3 118.8 2 . ? 
U1 C3 H3 128.8 . . ? 
C3 C4 C3 117.2(6) . 2 ? 
C3 C4 C5 128.8(8) . 2 ? 
C3 C4 C5 113.9(8) 2 2 ? 
C3 C4 C5 113.9(8) . . ? 
C3 C4 C5 128.8(8) 2 . ? 
C5 C4 C5 15.6(13) 2 . ? 
C3 C4 U1 71.5(2) . 2 ? 
C3 C4 U1 74.1(2) 2 2 ? 
C5 C4 U1 122.2(11) 2 2 ? 
C5 C4 U1 126.4(11) . 2 ? 
C3 C4 U1 74.1(2) . . ? 
C3 C4 U1 71.5(2) 2 . ? 
C5 C4 U1 126.4(11) 2 . ? 
C5 C4 U1 122.2(11) . . ? 
U1 C4 U1 110.8(2) 2 . ? 
C6 C5 C10 120.0 . . ? 
C6 C5 C4 122.3(10) . . ? 
C10 C5 C4 117.7(10) . . ? 
C7 C6 C5 120.0 . . ? 
C7 C6 H6 120.0 . . ? 
C5 C6 H6 120.0 . . ? 
C8 C7 C6 120.0 . . ? 
C8 C7 H7 120.0 . . ? 
C6 C7 H7 120.0 . . ? 
C7 C8 C9 120.0 . . ? 
C7 C8 H8 120.0 . . ? 
C9 C8 H8 120.0 . . ? 
C10 C9 C8 120.0 . . ? 
C10 C9 H9 120.0 . . ? 
C8 C9 H9 120.0 . . ? 
C9 C10 C5 120.0 . . ? 
C9 C10 H10 120.0 . . ? 
C5 C10 H10 120.0 . . ? 
O1 C11 C12 119.4(5) . . ? 
O1 C11 C16 118.9(4) . . ? 
C12 C11 C16 121.7(5) . . ? 
C13 C12 C11 117.1(5) . . ? 
C13 C12 C17 119.9(5) . . ? 
C11 C12 C17 122.9(5) . . ? 
C14 C13 C12 121.9(6) . . ? 
C14 C13 H13 119.1 . . ? 
C12 C13 H13 119.1 . . ? 
C15 C14 C13 120.1(6) . . ? 
C15 C14 H14 120.0 . . ? 
C13 C14 H14 120.0 . . ? 
C14 C15 C16 122.1(6) . . ? 
C14 C15 H15 118.9 . . ? 
C16 C15 H15 118.9 . . ? 
C15 C16 C11 116.6(5) . . ? 
C15 C16 C21 120.4(5) . . ? 
C11 C16 C21 122.8(4) . . ? 
C20 C17 C18 109.5(5) . . ? 
C20 C17 C12 109.5(5) . . ? 
C18 C17 C12 113.5(5) . . ? 
C20 C17 C19 106.4(5) . . ? 
C18 C17 C19 105.3(6) . . ? 
C12 C17 C19 112.3(5) . . ? 
C17 C18 H18A 109.5 . . ? 
C17 C18 H18B 109.5 . . ? 
H18A C18 H18B 109.5 . . ? 
C17 C18 H18C 109.5 . . ? 
H18A C18 H18C 109.5 . . ? 
H18B C18 H18C 109.5 . . ? 
C17 C20 H20A 109.5 . . ? 
C17 C20 H20B 109.5 . . ? 
H20A C20 H20B 109.5 . . ? 
C17 C20 H20C 109.5 . . ? 
H20A C20 H20C 109.5 . . ? 
H20B C20 H20C 109.5 . . ? 
C17 C19 H19A 109.5 . . ? 
C17 C19 H19B 109.5 . . ? 
H19A C19 H19B 109.5 . . ? 
C17 C19 H19C 109.5 . . ? 
H19A C19 H19C 109.5 . . ? 
H19B C19 H19C 109.5 . . ? 
C22 C21 C24 110.8(5) . . ? 
C22 C21 C23 106.2(4) . . ? 
C24 C21 C23 107.0(4) . . ? 
C22 C21 C16 113.2(4) . . ? 
C24 C21 C16 108.1(4) . . ? 
C23 C21 C16 111.5(4) . . ? 
C21 C22 H22A 109.5 . . ? 
C21 C22 H22B 109.5 . . ? 
H22A C22 H22B 109.5 . . ? 
C21 C22 H22C 109.5 . . ? 
H22A C22 H22C 109.5 . . ? 
H22B C22 H22C 109.5 . . ? 
C21 C24 H24A 109.5 . . ? 
C21 C24 H24B 109.5 . . ? 
H24A C24 H24B 109.5 . . ? 
C21 C24 H24C 109.5 . . ? 
H24A C24 H24C 109.5 . . ? 
H24B C24 H24C 109.5 . . ? 
C21 C23 H23A 109.5 . . ? 
C21 C23 H23B 109.5 . . ? 
H23A C23 H23B 109.5 . . ? 
C21 C23 H23C 109.5 . . ? 
H23A C23 H23C 109.5 . . ? 
H23B C23 H23C 109.5 . . ? 
O2 C25 C26 119.5(4) . . ? 
O2 C25 C30 118.9(4) . . ? 
C26 C25 C30 121.6(4) . . ? 
C27 C26 C25 117.5(5) . . ? 
C27 C26 C31 118.6(5) . . ? 
C25 C26 C31 123.8(4) . . ? 
C28 C27 C26 122.3(5) . . ? 
C28 C27 H27 118.8 . . ? 
C26 C27 H27 118.8 . . ? 
C27 C28 C29 119.9(5) . . ? 
C27 C28 H28 120.0 . . ? 
C29 C28 H28 120.0 . . ? 
C28 C29 C30 122.1(5) . . ? 
C28 C29 H29 119.0 . . ? 
C30 C29 H29 119.0 . . ? 
C29 C30 C25 116.5(5) . . ? 
C29 C30 C35 120.4(5) . . ? 
C25 C30 C35 123.1(4) . . ? 
C33 C31 C32 113.2(7) . . ? 
C33 C31 C34 107.7(6) . . ? 
C32 C31 C34 101.6(6) . . ? 
C33 C31 C26 108.8(5) . . ? 
C32 C31 C26 112.5(5) . . ? 
C34 C31 C26 112.9(5) . . ? 
C31 C32 H32A 109.5 . . ? 
C31 C32 H32B 109.5 . . ? 
H32A C32 H32B 109.5 . . ? 
C31 C32 H32C 109.5 . . ? 
H32A C32 H32C 109.5 . . ? 
H32B C32 H32C 109.5 . . ? 
C31 C33 H33A 109.5 . . ? 
C31 C33 H33B 109.5 . . ? 
H33A C33 H33B 109.5 . . ? 
C31 C33 H33C 109.5 . . ? 
H33A C33 H33C 109.5 . . ? 
H33B C33 H33C 109.5 . . ? 
C31 C34 H34A 109.5 . . ? 
C31 C34 H34B 109.5 . . ? 
H34A C34 H34B 109.5 . . ? 
C31 C34 H34C 109.5 . . ? 
H34A C34 H34C 109.5 . . ? 
H34B C34 H34C 109.5 . . ? 
C36 C35 C37 111.3(5) . . ? 
C36 C35 C30 110.3(5) . . ? 
C37 C35 C30 110.8(4) . . ? 
C36 C35 C38 107.1(5) . . ? 
C37 C35 C38 105.2(5) . . ? 
C30 C35 C38 112.1(4) . . ? 
C35 C36 H36A 109.5 . . ? 
C35 C36 H36B 109.5 . . ? 
H36A C36 H36B 109.5 . . ? 
C35 C36 H36C 109.5 . . ? 
H36A C36 H36C 109.5 . . ? 
H36B C36 H36C 109.5 . . ? 
C35 C37 H37A 109.5 . . ? 
C35 C37 H37B 109.5 . . ? 
H37A C37 H37B 109.5 . . ? 
C35 C37 H37C 109.5 . . ? 
H37A C37 H37C 109.5 . . ? 
H37B C37 H37C 109.5 . . ? 
C35 C38 H38A 109.5 . . ? 
C35 C38 H38B 109.5 . . ? 
H38A C38 H38B 109.5 . . ? 
C35 C38 H38C 109.5 . . ? 
H38A C38 H38C 109.5 . . ? 
H38B C38 H38C 109.5 . . ? 
 
loop_ 
 _geom_torsion_atom_site_label_1 
 _geom_torsion_atom_site_label_2 
 _geom_torsion_atom_site_label_3 
 _geom_torsion_atom_site_label_4 
 _geom_torsion 
 _geom_torsion_site_symmetry_1 
 _geom_torsion_site_symmetry_2 
 _geom_torsion_site_symmetry_3 
 _geom_torsion_site_symmetry_4 
 _geom_torsion_publ_flag 
O2 U1 O1 C11 177.4(6) . . . . ? 
C2 U1 O1 C11 -55.3(6) . . . . ? 
C3 U1 O1 C11 29.1(6) 2 . . . ? 
C1 U1 O1 C11 -56.8(7) . . . . ? 
C4 U1 O1 C11 4.5(6) . . . . ? 
C3 U1 O1 C11 -28.3(6) . . . . ? 
C2 U1 O1 C11 24.1(8) 2 . . . ? 
O1 U1 O2 C25 -139(2) . . . . ? 
C2 U1 O2 C25 90(2) . . . . ? 
C3 U1 O2 C25 8(2) 2 . . . ? 
C1 U1 O2 C25 62(2) . . . . ? 
C4 U1 O2 C25 21(2) . . . . ? 
C3 U1 O2 C25 95(2) . . . . ? 
C2 U1 O2 C25 31(2) 2 . . . ? 
O2 U1 C1 C2 -102.2(3) . . . 2 ? 
O1 U1 C1 C2 131.5(3) . . . 2 ? 
C2 U1 C1 C2 129.2(5) . . . 2 ? 
C3 U1 C1 C2 28.3(3) 2 . . 2 ? 
C4 U1 C1 C2 63.3(3) . . . 2 ? 
C3 U1 C1 C2 97.7(3) . . . 2 ? 
O2 U1 C1 C2 128.6(3) . . . . ? 
O1 U1 C1 C2 2.3(5) . . . . ? 
C3 U1 C1 C2 -100.9(3) 2 . . . ? 
C4 U1 C1 C2 -65.9(3) . . . . ? 
C3 U1 C1 C2 -31.5(3) . . . . ? 
C2 U1 C1 C2 -129.2(5) 2 . . . ? 
O2 U1 C1 U1 -165.49(9) . . . 2 ? 
O1 U1 C1 U1 68.2(3) . . . 2 ? 
C2 U1 C1 U1 65.9(3) . . . 2 ? 
C3 U1 C1 U1 -34.99(13) 2 . . 2 ? 
C4 U1 C1 U1 0.0 . . . 2 ? 
C3 U1 C1 U1 34.35(13) . . . 2 ? 
C2 U1 C1 U1 -63.3(3) 2 . . 2 ? 
C2 C1 C2 C3 4.5(3) 2 . . . ? 
U1 C1 C2 C3 -54.4(4) 2 . . . ? 
U1 C1 C2 C3 65.5(4) . . . . ? 
C2 C1 C2 U1 -60.95(11) 2 . . . ? 
U1 C1 C2 U1 -119.82(16) 2 . . . ? 
C2 C1 C2 U1 58.87(12) 2 . . 2 ? 
U1 C1 C2 U1 119.82(16) . . . 2 ? 
O2 U1 C2 C1 -59.1(3) . . . . ? 
O1 U1 C2 C1 -178.8(3) . . . . ? 
C3 U1 C2 C1 63.3(3) 2 . . . ? 
C4 U1 C2 C1 98.3(3) . . . . ? 
C3 U1 C2 C1 125.8(5) . . . . ? 
C2 U1 C2 C1 28.9(3) 2 . . . ? 
O2 U1 C2 C3 175.1(3) . . . . ? 
O1 U1 C2 C3 55.4(3) . . . . ? 
C3 U1 C2 C3 -62.4(3) 2 . . . ? 
C1 U1 C2 C3 -125.8(5) . . . . ? 
C4 U1 C2 C3 -27.5(3) . . . . ? 
C2 U1 C2 C3 -96.8(3) 2 . . . ? 
O2 U1 C2 U1 -122.60(19) . . . 2 ? 
O1 U1 C2 U1 117.72(19) . . . 2 ? 
C3 U1 C2 U1 -0.2(2) 2 . . 2 ? 
C1 U1 C2 U1 -63.5(3) . . . 2 ? 
C4 U1 C2 U1 34.81(15) . . . 2 ? 
C3 U1 C2 U1 62.3(3) . . . 2 ? 
C2 U1 C2 U1 -34.6(2) 2 . . 2 ? 
C1 C2 C3 C4 -9.2(6) . . . . ? 
U1 C2 C3 C4 55.8(4) . . . . ? 
U1 C2 C3 C4 -64.2(3) 2 . . . ? 
C1 C2 C3 U1 55.1(4) . . . 2 ? 
U1 C2 C3 U1 120.01(13) . . . 2 ? 
C1 C2 C3 U1 -64.9(3) . . . . ? 
U1 C2 C3 U1 -120.01(13) 2 . . . ? 
O2 U1 C3 C4 -140.6(3) . . . . ? 
O1 U1 C3 C4 93.1(3) . . . . ? 
C2 U1 C3 C4 -132.3(4) . . . . ? 
C3 U1 C3 C4 -31.0(3) 2 . . . ? 
C1 U1 C3 C4 -101.3(3) . . . . ? 
C2 U1 C3 C4 -66.7(3) 2 . . . ? 
O2 U1 C3 C2 -8.3(5) . . . . ? 
O1 U1 C3 C2 -134.6(3) . . . . ? 
C3 U1 C3 C2 101.3(3) 2 . . . ? 
C1 U1 C3 C2 31.0(3) . . . . ? 
C4 U1 C3 C2 132.3(4) . . . . ? 
C2 U1 C3 C2 65.6(4) 2 . . . ? 
O2 U1 C3 U1 -74.1(3) . . . 2 ? 
O1 U1 C3 U1 159.72(17) . . . 2 ? 
C2 U1 C3 U1 -65.7(3) . . . 2 ? 
C3 U1 C3 U1 35.6(2) 2 . . 2 ? 
C1 U1 C3 U1 -34.73(15) . . . 2 ? 
C4 U1 C3 U1 66.6(3) . . . 2 ? 
C2 U1 C3 U1 -0.1(2) 2 . . 2 ? 
C2 C3 C4 C3 4.5(3) . . . 2 ? 
U1 C3 C4 C3 -60.17(11) 2 . . 2 ? 
U1 C3 C4 C3 58.80(11) . . . 2 ? 
C2 C3 C4 C5 -178.5(14) . . . 2 ? 
U1 C3 C4 C5 116.8(14) 2 . . 2 ? 
U1 C3 C4 C5 -124.2(14) . . . 2 ? 
C2 C3 C4 C5 -172.9(12) . . . . ? 
U1 C3 C4 C5 122.4(12) 2 . . . ? 
U1 C3 C4 C5 -118.6(12) . . . . ? 
C2 C3 C4 U1 64.7(4) . . . 2 ? 
U1 C3 C4 U1 118.96(15) . . . 2 ? 
C2 C3 C4 U1 -54.3(4) . . . . ? 
U1 C3 C4 U1 -118.96(15) 2 . . . ? 
O2 U1 C4 C3 107.3(3) . . . . ? 
O1 U1 C4 C3 -92.9(3) . . . . ? 
C2 U1 C4 C3 27.9(3) . . . . ? 
C3 U1 C4 C3 126.6(5) 2 . . . ? 
C1 U1 C4 C3 62.5(3) . . . . ? 
C2 U1 C4 C3 96.1(3) 2 . . . ? 
O2 U1 C4 C3 -19.3(5) . . . 2 ? 
O1 U1 C4 C3 140.4(3) . . . 2 ? 
C2 U1 C4 C3 -98.8(3) . . . 2 ? 
C1 U1 C4 C3 -64.1(3) . . . 2 ? 
C3 U1 C4 C3 -126.6(5) . . . 2 ? 
C2 U1 C4 C3 -30.5(3) 2 . . 2 ? 
O2 U1 C4 C5 -125.8(9) . . . 2 ? 
O1 U1 C4 C5 33.9(9) . . . 2 ? 
C2 U1 C4 C5 154.7(9) . . . 2 ? 
C3 U1 C4 C5 -106.5(9) 2 . . 2 ? 
C1 U1 C4 C5 -170.6(9) . . . 2 ? 
C3 U1 C4 C5 126.8(9) . . . 2 ? 
C2 U1 C4 C5 -137.0(9) 2 . . 2 ? 
O2 U1 C4 C5 -144.1(10) . . . . ? 
O1 U1 C4 C5 15.7(9) . . . . ? 
C2 U1 C4 C5 136.5(9) . . . . ? 
C3 U1 C4 C5 -124.8(10) 2 . . . ? 
C1 U1 C4 C5 171.1(9) . . . . ? 
C3 U1 C4 C5 108.6(10) . . . . ? 
C2 U1 C4 C5 -155.3(9) 2 . . . ? 
O2 U1 C4 U1 44.8(3) . . . 2 ? 
O1 U1 C4 U1 -155.43(8) . . . 2 ? 
C2 U1 C4 U1 -34.64(14) . . . 2 ? 
C3 U1 C4 U1 64.1(3) 2 . . 2 ? 
C1 U1 C4 U1 0.0 . . . 2 ? 
C3 U1 C4 U1 -62.5(3) . . . 2 ? 
C2 U1 C4 U1 33.63(14) 2 . . 2 ? 
C3 C4 C5 C6 28.6(17) . . . . ? 
C3 C4 C5 C6 -148.4(6) 2 . . . ? 
C5 C4 C5 C6 -168(10) 2 . . . ? 
U1 C4 C5 C6 112.6(10) 2 . . . ? 
U1 C4 C5 C6 -57.1(16) . . . . ? 
C3 C4 C5 C10 -154.1(7) . . . . ? 
C3 C4 C5 C10 28.9(19) 2 . . . ? 
C5 C4 C5 C10 9(7) 2 . . . ? 
U1 C4 C5 C10 -70.1(14) 2 . . . ? 
U1 C4 C5 C10 120.2(8) . . . . ? 
C10 C5 C6 C7 0.0 . . . . ? 
C4 C5 C6 C7 177(2) . . . . ? 
C5 C6 C7 C8 0.0 . . . . ? 
C6 C7 C8 C9 0.0 . . . . ? 
C7 C8 C9 C10 0.0 . . . . ? 
C8 C9 C10 C5 0.0 . . . . ? 
C6 C5 C10 C9 0.0 . . . . ? 
C4 C5 C10 C9 -177(2) . . . . ? 
U1 O1 C11 C12 -83.7(7) . . . . ? 
U1 O1 C11 C16 95.6(7) . . . . ? 
O1 C11 C12 C13 171.7(5) . . . . ? 
C16 C11 C12 C13 -7.6(8) . . . . ? 
O1 C11 C12 C17 -12.4(8) . . . . ? 
C16 C11 C12 C17 168.3(5) . . . . ? 
C11 C12 C13 C14 1.5(10) . . . . ? 
C17 C12 C13 C14 -174.5(6) . . . . ? 
C12 C13 C14 C15 3.8(12) . . . . ? 
C13 C14 C15 C16 -3.0(12) . . . . ? 
C14 C15 C16 C11 -2.8(9) . . . . ? 
C14 C15 C16 C21 172.9(6) . . . . ? 
O1 C11 C16 C15 -171.1(5) . . . . ? 
C12 C11 C16 C15 8.3(8) . . . . ? 
O1 C11 C16 C21 13.3(7) . . . . ? 
C12 C11 C16 C21 -167.4(5) . . . . ? 
C13 C12 C17 C20 112.4(6) . . . . ? 
C11 C12 C17 C20 -63.4(7) . . . . ? 
C13 C12 C17 C18 -124.9(6) . . . . ? 
C11 C12 C17 C18 59.3(8) . . . . ? 
C13 C12 C17 C19 -5.6(8) . . . . ? 
C11 C12 C17 C19 178.6(6) . . . . ? 
C15 C16 C21 C22 121.0(6) . . . . ? 
C11 C16 C21 C22 -63.5(7) . . . . ? 
C15 C16 C21 C24 -116.0(6) . . . . ? 
C11 C16 C21 C24 59.5(6) . . . . ? 
C15 C16 C21 C23 1.4(7) . . . . ? 
C11 C16 C21 C23 176.8(5) . . . . ? 
U1 O2 C25 C26 44(2) . . . . ? 
U1 O2 C25 C30 -135.6(18) . . . . ? 
O2 C25 C26 C27 178.1(4) . . . . ? 
C30 C25 C26 C27 -2.0(7) . . . . ? 
O2 C25 C26 C31 0.9(7) . . . . ? 
C30 C25 C26 C31 -179.1(5) . . . . ? 
C25 C26 C27 C28 0.8(9) . . . . ? 
C31 C26 C27 C28 178.1(6) . . . . ? 
C26 C27 C28 C29 0.8(10) . . . . ? 
C27 C28 C29 C30 -1.4(10) . . . . ? 
C28 C29 C30 C25 0.3(8) . . . . ? 
C28 C29 C30 C35 -179.8(6) . . . . ? 
O2 C25 C30 C29 -178.6(4) . . . . ? 
C26 C25 C30 C29 1.4(7) . . . . ? 
O2 C25 C30 C35 1.5(7) . . . . ? 
C26 C25 C30 C35 -178.5(5) . . . . ? 
C27 C26 C31 C33 -98.7(7) . . . . ? 
C25 C26 C31 C33 78.4(7) . . . . ? 
C27 C26 C31 C32 135.1(7) . . . . ? 
C25 C26 C31 C32 -47.8(8) . . . . ? 
C27 C26 C31 C34 20.8(7) . . . . ? 
C25 C26 C31 C34 -162.1(6) . . . . ? 
C29 C30 C35 C36 -116.8(6) . . . . ? 
C25 C30 C35 C36 63.1(6) . . . . ? 
C29 C30 C35 C37 119.5(6) . . . . ? 
C25 C30 C35 C37 -60.6(6) . . . . ? 
C29 C30 C35 C38 2.4(7) . . . . ? 
C25 C30 C35 C38 -177.7(5) . . . . ? 
 
_diffrn_measured_fraction_theta_max    0.998 
_diffrn_reflns_theta_full              27.50 
_diffrn_measured_fraction_theta_full   0.998 
_refine_diff_density_max    1.060 
_refine_diff_density_min   -1.017 
_refine_diff_density_rms    0.105 
 
