# Supplementary material for: Spontaneous reduction and C–H borylation of arenes mediated by uranium(III) disproportionation
Source: Springer Nature journal article supplement (doi:10.1038/nchem.1392), 2012-07-13
Supplement: 41557_2012_BFnchem1392_MOESM16_ESM.cif [file 41557_2012_BFnchem1392_MOESM16_ESM.cif]

#==============================================================================

# SUBMISSION DETAILS

_publ_contact_author_name             'Polly L Arnold'
_publ_contact_author_email            'Polly.Arnold@ed.ac.uk'
_publ_contact_author_fax              '+44 131 650 6453'
_publ_contact_author_phone            '+44 131 650 5429'
_publ_requested_journal               'Nature Chemistry'

#==============================================================================

# TITLE AND AUTHOR LIST

_publ_section_title
;
Spontaneous reduction and C-H borylation of arenes mediated by 
uranium(III) disproportionation
;
_publ_section_title_footnote
;
CCDC number 855809
;
loop_
_publ_author_name
;
Polly L. Arnold, Stephen M. Mansell, Laurent Maron and David McKay
;
_publ_author_address
;
EaStCHEM School of Chemistry,
Joseph Black Building, University of Edinburgh,
The King's Buildings, Edinburgh, EH9 3JJ, UK.
;

#==============================================================================
data_(N'')2U(biphenyl)U(N'')2_complex_4 
 
_audit_creation_method            SHELXL-97 
_chemical_name_systematic 
; 
 ? 
; 
_chemical_name_common             ? 
_chemical_melting_point           ? 
_chemical_formula_moiety          'C36 H82 N4 Si8 U2' 
_chemical_formula_sum 
 'C36 H82 N4 Si8 U2' 
_chemical_formula_weight          1271.84 
 
loop_ 
 _atom_type_symbol 
 _atom_type_description 
 _atom_type_scat_dispersion_real 
 _atom_type_scat_dispersion_imag 
 _atom_type_scat_source 
 'C'  'C'   0.0033   0.0016 
 'International Tables Vol C Tables 4.2.6.8 and 6.1.1.4' 
 'H'  'H'   0.0000   0.0000 
 'International Tables Vol C Tables 4.2.6.8 and 6.1.1.4' 
 'N'  'N'   0.0061   0.0033 
 'International Tables Vol C Tables 4.2.6.8 and 6.1.1.4' 
 'Si'  'Si'   0.0817   0.0704 
 'International Tables Vol C Tables 4.2.6.8 and 6.1.1.4' 
 'U'  'U'  -9.6767   9.6646 
 'International Tables Vol C Tables 4.2.6.8 and 6.1.1.4' 
 
_symmetry_cell_setting            Tetragonal	 
_symmetry_space_group_name_H-M    P4(2)
_symmetry_dpace_group_name_Hall   'P 4c' 
 
loop_ 
 _symmetry_equiv_pos_as_xyz 
 'x, y, z' 
 '-x, -y, z' 
 '-y, x, z+1/2' 
 'y, -x, z+1/2' 
 
_cell_length_a                    14.89570(10) 
_cell_length_b                    14.89570(10) 
_cell_length_c                    12.1430(2) 
_cell_angle_alpha                 90.00 
_cell_angle_beta                  90.00 
_cell_angle_gamma                 90.00 
_cell_volume                      2694.31(5) 
_cell_formula_units_Z             2 
_cell_measurement_temperature     170(2) 
_cell_measurement_reflns_used   5897
_cell_measurement_theta_min     3.0518
_cell_measurement_theta_max     27.4225
 
_exptl_crystal_description        Block 
_exptl_crystal_colour             Black
_exptl_crystal_size_max           0.30 
_exptl_crystal_size_mid           0.08
_exptl_crystal_size_min           0.03
_exptl_crystal_density_meas       ? 
_exptl_crystal_density_diffrn     1.568 
_exptl_crystal_density_method     'not measured' 
_exptl_crystal_F_000              1244 
_exptl_absorpt_coefficient_mu     6.207 
_exptl_absorpt_correction_T_min                   0.72272
_exptl_absorpt_correction_T_max                   1.00000
_exptl_absorpt_correction_type            'multi-scan'
_exptl_absorpt_process_details
;
CrysAlisPro, Agilent Technologies,
Version 1.171.34.49 (release 20-01-2011 CrysAlis171 .NET)
(compiled Jan 20 2011,15:58:25)
Empirical absorption correction using spherical harmonics,
 implemented in SCALE3 ABSPACK scaling algorithm.
;
 
_exptl_special_details 
; 
 ? 
; 
 
_diffrn_ambient_temperature       170(2) 
_diffrn_radiation_wavelength      0.71073 
_diffrn_radiation_type            MoK\a 
_diffrn_radiation_source 'Enhance (Mo) X-ray Source'
_diffrn_radiation_monochromator 'graphite'
_diffrn_measurement_device_type 'Xcalibur, Eos'
_diffrn_measurement_method        '\w scans' 
_diffrn_detector_area_resol_mean  16.1042
_diffrn_standards_number          0 
_diffrn_standards_interval_count  ? 
_diffrn_standards_interval_time   ? 
_diffrn_standards_decay_%         ? 
_diffrn_reflns_number             17409 
_diffrn_reflns_av_R_equivalents   0.0352 
_diffrn_reflns_av_sigmaI/netI     0.0491 
_diffrn_reflns_limit_h_min        -19 
_diffrn_reflns_limit_h_max        19 
_diffrn_reflns_limit_k_min        -18 
_diffrn_reflns_limit_k_max        19 
_diffrn_reflns_limit_l_min        -13 
_diffrn_reflns_limit_l_max        15 
_diffrn_reflns_theta_min          3.06 
_diffrn_reflns_theta_max          27.48 
_reflns_number_total              6014 
_reflns_number_gt                 5176 
_reflns_threshold_expression      >2sigma(I) 
 
_computing_data_collection
;
CrysAlisPro, Agilent Technologies,
Version 1.171.34.49 (release 20-01-2011 CrysAlis171 .NET)
(compiled Jan 20 2011,15:58:25)
;
_computing_cell_refinement
;
CrysAlisPro, Agilent Technologies,
Version 1.171.34.49 (release 20-01-2011 CrysAlis171 .NET)
(compiled Jan 20 2011,15:58:25)
;
_computing_data_reduction
;
CrysAlisPro, Agilent Technologies,
Version 1.171.34.49 (release 20-01-2011 CrysAlis171 .NET)
(compiled Jan 20 2011,15:58:25)
;
_computing_structure_solution     'SHELXS-97 (Sheldrick, 1990)' 
_computing_structure_refinement   'SHELXL-97 (Sheldrick, 1997)' 
_computing_molecular_graphics     ? 
_computing_publication_material   ? 
 
_refine_special_details 
; 
 Refinement of F^2^ against ALL reflections.  The weighted R-factor wR and 
 goodness of fit S are based on F^2^, conventional R-factors R are based 
 on F, with F set to zero for negative F^2^. The threshold expression of 
 F^2^ > 2sigma(F^2^) is used only for calculating R-factors(gt) etc. and is 
 not relevant to the choice of reflections for refinement.  R-factors based 
 on F^2^ are statistically about twice as large as those based on F, and R- 
 factors based on ALL data will be even larger. 
; 
 
_refine_ls_structure_factor_coef  Fsqd  
_refine_ls_matrix_type            full 
_refine_ls_weighting_scheme       calc  
_refine_ls_weighting_details 
 'calc w=1/[\s^2^(Fo^2^)+(0.0127P)^2^+0.0000P] where P=(Fo^2^+2Fc^2^)/3' 
_atom_sites_solution_primary      direct 
_atom_sites_solution_secondary    difmap 
_atom_sites_solution_hydrogens    geom 
_refine_ls_hydrogen_treatment     constr 
_refine_ls_extinction_method      none 
_refine_ls_extinction_coef        ? 
_refine_ls_abs_structure_details 
 'Flack H D (1983), Acta Cryst. A39, 876-881' 
_refine_ls_abs_structure_Flack    0.009(6) 
_refine_ls_number_reflns          6014 
_refine_ls_number_parameters      241 
_refine_ls_number_restraints      1 
_refine_ls_R_factor_all           0.0377 
_refine_ls_R_factor_gt            0.0278 
_refine_ls_wR_factor_ref          0.0541 
_refine_ls_wR_factor_gt           0.0509 
_refine_ls_goodness_of_fit_ref    1.053 
_refine_ls_restrained_S_all       1.052 
_refine_ls_shift/su_max           0.001 
_refine_ls_shift/su_mean          0.000 
 
loop_ 
 _atom_site_label 
 _atom_site_type_symbol 
 _atom_site_fract_x 
 _atom_site_fract_y 
 _atom_site_fract_z 
 _atom_site_U_iso_or_equiv 
 _atom_site_adp_type 
 _atom_site_occupancy 
 _atom_site_symmetry_multiplicity 
 _atom_site_calc_flag 
 _atom_site_refinement_flags 
 _atom_site_disorder_assembly 
 _atom_site_disorder_group 
U1 U 0.398663(10) 0.101820(10) 0.18801(4) 0.02021(5) Uani 1 1 d . . . 
N1 N 0.4004(3) 0.2239(3) 0.3031(3) 0.0228(10) Uani 1 1 d . . . 
N2 N 0.2718(3) 0.1077(3) 0.0807(4) 0.0242(10) Uani 1 1 d . . . 
Si1 Si 0.33793(14) 0.20262(12) 0.41815(15) 0.0372(4) Uani 1 1 d . . . 
Si2 Si 0.45859(11) 0.32465(10) 0.29183(13) 0.0281(4) Uani 1 1 d . . . 
Si3 Si 0.28535(12) 0.18705(13) -0.02161(14) 0.0350(4) Uani 1 1 d . . . 
Si4 Si 0.17481(11) 0.04524(11) 0.09207(14) 0.0316(4) Uani 1 1 d . . . 
C1 C 0.5000 0.0000 0.3064(9) 0.030(3) Uani 1 2 d S . . 
H1 H 0.5000 0.0000 0.3846 0.036 Uiso 1 2 calc SR . . 
C2 C 0.5621(5) 0.0567(4) 0.2479(5) 0.0228(17) Uani 1 1 d . . . 
H2 H 0.6057 0.0906 0.2871 0.027 Uiso 1 1 calc R . . 
C3 C 0.5576(4) 0.0619(5) 0.1294(6) 0.0240(17) Uani 1 1 d . . . 
H3 H 0.5924 0.1058 0.0919 0.029 Uiso 1 1 calc R . . 
C4 C 0.5000 0.0000 0.0650(8) 0.017(2) Uani 1 2 d S . . 
C5 C 0.5000 0.0000 -0.0551(6) 0.0276(18) Uani 1 2 d S . . 
C6 C 0.5512(5) 0.0578(4) -0.1156(5) 0.0516(19) Uani 1 1 d . . . 
H6 H 0.5875 0.0999 -0.0772 0.062 Uiso 1 1 calc R . . 
C7 C 0.5532(7) 0.0587(6) -0.2278(6) 0.080(3) Uani 1 1 d . . . 
H7 H 0.5912 0.0996 -0.2655 0.097 Uiso 1 1 calc R . . 
C8 C 0.5000 0.0000 -0.2862(9) 0.094(5) Uani 1 2 d S . . 
H8 H 0.5000 0.0000 -0.3644 0.113 Uiso 1 2 calc SR . . 
C9 C 0.2754(4) 0.0943(4) 0.3953(6) 0.0474(18) Uani 1 1 d . . . 
H9A H 0.2295 0.1031 0.3386 0.071 Uiso 1 1 calc R . . 
H9B H 0.2467 0.0756 0.4642 0.071 Uiso 1 1 calc R . . 
H9C H 0.3176 0.0477 0.3712 0.071 Uiso 1 1 calc R . . 
C10 C 0.2476(5) 0.2883(5) 0.4444(7) 0.068(2) Uani 1 1 d . . . 
H10A H 0.2751 0.3472 0.4566 0.101 Uiso 1 1 calc R . . 
H10B H 0.2131 0.2709 0.5098 0.101 Uiso 1 1 calc R . . 
H10C H 0.2074 0.2913 0.3806 0.101 Uiso 1 1 calc R . . 
C11 C 0.4074(5) 0.1841(5) 0.5461(5) 0.063(2) Uani 1 1 d . . . 
H11A H 0.4660 0.1595 0.5256 0.095 Uiso 1 1 calc R . . 
H11B H 0.3764 0.1419 0.5949 0.095 Uiso 1 1 calc R . . 
H11C H 0.4158 0.2415 0.5844 0.095 Uiso 1 1 calc R . . 
C12 C 0.5594(4) 0.3108(4) 0.2093(6) 0.048(2) Uani 1 1 d . . . 
H12A H 0.6001 0.2687 0.2460 0.072 Uiso 1 1 calc R . . 
H12B H 0.5893 0.3690 0.2007 0.072 Uiso 1 1 calc R . . 
H12C H 0.5432 0.2873 0.1366 0.072 Uiso 1 1 calc R . . 
C13 C 0.3864(4) 0.4142(4) 0.2327(5) 0.0452(18) Uani 1 1 d . . . 
H13A H 0.3546 0.3908 0.1682 0.068 Uiso 1 1 calc R . . 
H13B H 0.4238 0.4653 0.2108 0.068 Uiso 1 1 calc R . . 
H13C H 0.3427 0.4338 0.2881 0.068 Uiso 1 1 calc R . . 
C14 C 0.5001(4) 0.3697(4) 0.4271(5) 0.0429(16) Uani 1 1 d . . . 
H14A H 0.4488 0.3880 0.4724 0.064 Uiso 1 1 calc R . . 
H14B H 0.5391 0.4215 0.4139 0.064 Uiso 1 1 calc R . . 
H14C H 0.5341 0.3229 0.4657 0.064 Uiso 1 1 calc R . . 
C15 C 0.4002(4) 0.2381(4) -0.0008(5) 0.0324(14) Uani 1 1 d . . . 
H15A H 0.4031 0.2663 0.0720 0.049 Uiso 1 1 calc R . . 
H15B H 0.4111 0.2835 -0.0577 0.049 Uiso 1 1 calc R . . 
H15C H 0.4459 0.1911 -0.0059 0.049 Uiso 1 1 calc R . . 
C16 C 0.2010(4) 0.2805(5) -0.0119(6) 0.063(2) Uani 1 1 d . . . 
H16A H 0.1403 0.2558 -0.0189 0.094 Uiso 1 1 calc R . . 
H16B H 0.2117 0.3238 -0.0712 0.094 Uiso 1 1 calc R . . 
H16C H 0.2071 0.3106 0.0595 0.094 Uiso 1 1 calc R . . 
C17 C 0.2867(5) 0.1434(5) -0.1658(5) 0.059(2) Uani 1 1 d . . . 
H17A H 0.3222 0.0880 -0.1688 0.088 Uiso 1 1 calc R . . 
H17B H 0.3134 0.1884 -0.2147 0.088 Uiso 1 1 calc R . . 
H17C H 0.2251 0.1308 -0.1896 0.088 Uiso 1 1 calc R . . 
C18 C 0.1923(4) -0.0546(4) 0.1774(8) 0.0523(17) Uani 1 1 d . . . 
H18A H 0.2345 -0.0951 0.1405 0.079 Uiso 1 1 calc R . . 
H18B H 0.1349 -0.0854 0.1884 0.079 Uiso 1 1 calc R . . 
H18C H 0.2169 -0.0366 0.2489 0.079 Uiso 1 1 calc R . . 
C19 C 0.0820(4) 0.1133(4) 0.1534(5) 0.053(2) Uani 1 1 d . . . 
H19A H 0.1044 0.1455 0.2182 0.080 Uiso 1 1 calc R . . 
H19B H 0.0327 0.0735 0.1753 0.080 Uiso 1 1 calc R . . 
H19C H 0.0602 0.1566 0.0989 0.080 Uiso 1 1 calc R . . 
C20 C 0.1336(4) 0.0020(5) -0.0426(5) 0.055(2) Uani 1 1 d . . . 
H20A H 0.1111 0.0521 -0.0870 0.083 Uiso 1 1 calc R . . 
H20B H 0.0850 -0.0412 -0.0299 0.083 Uiso 1 1 calc R . . 
H20C H 0.1829 -0.0277 -0.0816 0.083 Uiso 1 1 calc R . . 
 
loop_ 
 _atom_site_aniso_label 
 _atom_site_aniso_U_11 
 _atom_site_aniso_U_22 
 _atom_site_aniso_U_33 
 _atom_site_aniso_U_23 
 _atom_site_aniso_U_13 
 _atom_site_aniso_U_12 
U1 0.02117(9) 0.01860(9) 0.02085(9) -0.00106(17) -0.00088(17) 0.00445(7) 
N1 0.029(3) 0.023(2) 0.017(2) -0.004(2) 0.000(2) 0.006(2) 
N2 0.020(2) 0.028(2) 0.024(3) 0.000(2) 0.001(2) 0.006(2) 
Si1 0.0456(11) 0.0335(10) 0.0326(10) -0.0077(8) 0.0132(10) 0.0007(9) 
Si2 0.0349(9) 0.0209(8) 0.0285(9) -0.0012(7) -0.0031(8) 0.0000(7) 
Si3 0.0254(9) 0.0452(11) 0.0345(10) 0.0130(9) -0.0044(8) 0.0016(8) 
Si4 0.0226(8) 0.0362(9) 0.0359(9) -0.0020(8) -0.0009(8) -0.0027(7) 
C1 0.046(7) 0.029(6) 0.015(6) 0.000 0.000 0.024(5) 
C2 0.030(4) 0.021(4) 0.017(5) -0.009(3) -0.009(3) 0.001(4) 
C3 0.012(3) 0.021(4) 0.039(5) 0.002(3) 0.005(3) 0.002(3) 
C4 0.017(5) 0.016(5) 0.019(5) 0.000 0.000 -0.004(4) 
C5 0.044(5) 0.018(4) 0.021(4) 0.000 0.000 0.012(4) 
C6 0.081(6) 0.046(4) 0.028(4) 0.001(3) 0.014(4) 0.002(4) 
C7 0.130(9) 0.073(6) 0.038(5) 0.020(4) 0.021(5) 0.009(6) 
C8 0.162(14) 0.084(9) 0.038(10) 0.000 0.000 0.071(10) 
C9 0.049(4) 0.038(4) 0.056(5) 0.004(3) 0.023(4) -0.001(3) 
C10 0.059(5) 0.069(6) 0.074(6) -0.013(5) 0.025(4) 0.022(4) 
C11 0.101(7) 0.061(5) 0.027(4) 0.012(4) 0.003(4) -0.005(5) 
C12 0.039(3) 0.046(4) 0.059(6) -0.002(4) -0.002(4) -0.008(3) 
C13 0.063(5) 0.021(3) 0.052(4) -0.002(3) -0.007(3) 0.005(3) 
C14 0.055(4) 0.038(4) 0.036(4) -0.004(3) -0.009(3) -0.007(3) 
C15 0.038(4) 0.034(3) 0.025(3) 0.009(3) 0.004(3) 0.001(3) 
C16 0.041(4) 0.056(5) 0.091(6) 0.039(5) 0.014(4) 0.023(4) 
C17 0.061(5) 0.080(6) 0.034(4) 0.009(4) -0.012(4) -0.018(4) 
C18 0.046(3) 0.037(3) 0.074(5) 0.005(5) 0.011(6) -0.013(3) 
C19 0.030(3) 0.065(5) 0.065(6) 0.002(4) 0.012(3) 0.007(3) 
C20 0.050(4) 0.063(5) 0.053(5) -0.005(4) -0.009(4) -0.022(4) 
 
_geom_special_details 
; 
 All esds (except the esd in the dihedral angle between two l.s. planes) 
 are estimated using the full covariance matrix.  The cell esds are taken 
 into account individually in the estimation of esds in distances, angles 
 and torsion angles; correlations between esds in cell parameters are only 
 used when they are defined by crystal symmetry.  An approximate (isotropic) 
 treatment of cell esds is used for estimating esds involving l.s. planes. 
; 
 
loop_ 
 _geom_bond_atom_site_label_1 
 _geom_bond_atom_site_label_2 
 _geom_bond_distance 
 _geom_bond_site_symmetry_2 
 _geom_bond_publ_flag 
U1 N1 2.294(4) . ? 
U1 N2 2.297(4) . ? 
U1 C2 2.539(6) 2_655 ? 
U1 C3 2.543(6) . ? 
U1 C1 2.578(6) . ? 
U1 C4 2.609(5) . ? 
U1 C3 2.622(7) 2_655 ? 
U1 C2 2.628(6) . ? 
U1 Si1 3.2989(17) . ? 
U1 Si3 3.3076(17) . ? 
N1 Si1 1.709(5) . ? 
N1 Si2 1.738(5) . ? 
N2 Si4 1.725(5) . ? 
N2 Si3 1.727(5) . ? 
Si1 C10 1.882(6) . ? 
Si1 C9 1.884(6) . ? 
Si1 C11 1.887(6) . ? 
Si2 C12 1.817(7) . ? 
Si2 C13 1.858(6) . ? 
Si2 C14 1.879(6) . ? 
Si3 C17 1.868(6) . ? 
Si3 C16 1.878(6) . ? 
Si3 C15 1.889(6) . ? 
Si4 C18 1.831(7) . ? 
Si4 C20 1.862(6) . ? 
Si4 C19 1.870(6) . ? 
C1 C2 1.440(9) 2_655 ? 
C1 C2 1.440(9) . ? 
C1 U1 2.578(6) 2_655 ? 
C1 H1 0.9500 . ? 
C2 C3 1.442(5) . ? 
C2 U1 2.539(6) 2_655 ? 
C2 H2 0.9500 . ? 
C3 C4 1.483(9) . ? 
C3 U1 2.622(7) 2_655 ? 
C3 H3 0.9500 . ? 
C4 C5 1.459(12) . ? 
C4 C3 1.483(9) 2_655 ? 
C4 U1 2.609(5) 2_655 ? 
C5 C6 1.364(7) . ? 
C5 C6 1.364(7) 2_655 ? 
C6 C7 1.363(9) . ? 
C6 H6 0.9500 . ? 
C7 C8 1.377(10) . ? 
C7 H7 0.9500 . ? 
C8 C7 1.377(10) 2_655 ? 
C8 H8 0.9500 . ? 
C9 H9A 0.9800 . ? 
C9 H9B 0.9800 . ? 
C9 H9C 0.9800 . ? 
C10 H10A 0.9800 . ? 
C10 H10B 0.9800 . ? 
C10 H10C 0.9800 . ? 
C11 H11A 0.9800 . ? 
C11 H11B 0.9800 . ? 
C11 H11C 0.9800 . ? 
C12 H12A 0.9800 . ? 
C12 H12B 0.9800 . ? 
C12 H12C 0.9800 . ? 
C13 H13A 0.9800 . ? 
C13 H13B 0.9800 . ? 
C13 H13C 0.9800 . ? 
C14 H14A 0.9800 . ? 
C14 H14B 0.9800 . ? 
C14 H14C 0.9800 . ? 
C15 H15A 0.9800 . ? 
C15 H15B 0.9800 . ? 
C15 H15C 0.9800 . ? 
C16 H16A 0.9800 . ? 
C16 H16B 0.9800 . ? 
C16 H16C 0.9800 . ? 
C17 H17A 0.9800 . ? 
C17 H17B 0.9800 . ? 
C17 H17C 0.9800 . ? 
C18 H18A 0.9800 . ? 
C18 H18B 0.9800 . ? 
C18 H18C 0.9800 . ? 
C19 H19A 0.9800 . ? 
C19 H19B 0.9800 . ? 
C19 H19C 0.9800 . ? 
C20 H20A 0.9800 . ? 
C20 H20B 0.9800 . ? 
C20 H20C 0.9800 . ? 
 
loop_ 
 _geom_angle_atom_site_label_1 
 _geom_angle_atom_site_label_2 
 _geom_angle_atom_site_label_3 
 _geom_angle 
 _geom_angle_site_symmetry_1 
 _geom_angle_site_symmetry_3 
 _geom_angle_publ_flag 
N1 U1 N2 108.94(15) . . ? 
N1 U1 C2 124.09(18) . 2_655 ? 
N2 U1 C2 112.80(19) . 2_655 ? 
N1 U1 C3 110.19(19) . . ? 
N2 U1 C3 128.05(19) . . ? 
C2 U1 C3 69.39(17) 2_655 . ? 
N1 U1 C1 96.91(19) . . ? 
N2 U1 C1 145.14(12) . . ? 
C2 U1 C1 32.67(17) 2_655 . ? 
C3 U1 C1 58.2(2) . . ? 
N1 U1 C4 143.40(12) . . ? 
N2 U1 C4 100.00(18) . . ? 
C2 U1 C4 59.3(2) 2_655 . ? 
C3 U1 C4 33.42(17) . . ? 
C1 U1 C4 68.79(15) . . ? 
N1 U1 C3 154.14(18) . 2_655 ? 
N2 U1 C3 94.93(18) . 2_655 ? 
C2 U1 C3 32.39(12) 2_655 2_655 ? 
C3 U1 C3 58.4(3) . 2_655 ? 
C1 U1 C3 57.2(2) . 2_655 ? 
C4 U1 C3 32.93(17) . 2_655 ? 
N1 U1 C2 91.35(18) . . ? 
N2 U1 C2 158.25(18) . . ? 
C2 U1 C2 58.0(3) 2_655 . ? 
C3 U1 C2 32.33(12) . . ? 
C1 U1 C2 32.10(17) . . ? 
C4 U1 C2 58.3(2) . . ? 
C3 U1 C2 66.89(16) 2_655 . ? 
N1 U1 Si1 29.10(11) . . ? 
N2 U1 Si1 103.74(11) . . ? 
C2 U1 Si1 104.12(16) 2_655 . ? 
C3 U1 Si1 126.78(16) . . ? 
C1 U1 Si1 87.49(19) . . ? 
C4 U1 Si1 155.23(17) . . ? 
C3 U1 Si1 136.15(16) 2_655 . ? 
C2 U1 Si1 97.81(15) . . ? 
N1 U1 Si3 99.80(11) . . ? 
N2 U1 Si3 29.42(11) . . ? 
C2 U1 Si3 134.02(16) 2_655 . ? 
C3 U1 Si3 110.47(16) . . ? 
C1 U1 Si3 162.51(19) . . ? 
C4 U1 Si3 94.47(17) . . ? 
C3 U1 Si3 105.95(16) 2_655 . ? 
C2 U1 Si3 141.61(15) . . ? 
Si1 U1 Si3 109.71(5) . . ? 
Si1 N1 Si2 119.7(3) . . ? 
Si1 N1 U1 110.1(2) . . ? 
Si2 N1 U1 130.0(2) . . ? 
Si4 N2 Si3 121.6(3) . . ? 
Si4 N2 U1 128.6(2) . . ? 
Si3 N2 U1 109.8(2) . . ? 
N1 Si1 C10 113.7(3) . . ? 
N1 Si1 C9 107.9(3) . . ? 
C10 Si1 C9 104.6(3) . . ? 
N1 Si1 C11 113.7(3) . . ? 
C10 Si1 C11 110.6(3) . . ? 
C9 Si1 C11 105.5(3) . . ? 
N1 Si1 U1 40.75(15) . . ? 
C10 Si1 U1 130.4(3) . . ? 
C9 Si1 U1 67.7(2) . . ? 
C11 Si1 U1 118.7(2) . . ? 
N1 Si2 C12 110.9(2) . . ? 
N1 Si2 C13 111.2(3) . . ? 
C12 Si2 C13 110.3(3) . . ? 
N1 Si2 C14 113.8(2) . . ? 
C12 Si2 C14 104.5(3) . . ? 
C13 Si2 C14 105.8(3) . . ? 
N2 Si3 C17 116.0(3) . . ? 
N2 Si3 C16 112.6(3) . . ? 
C17 Si3 C16 108.9(3) . . ? 
N2 Si3 C15 106.6(2) . . ? 
C17 Si3 C15 104.8(3) . . ? 
C16 Si3 C15 107.4(3) . . ? 
N2 Si3 U1 40.79(15) . . ? 
C17 Si3 U1 125.6(2) . . ? 
C16 Si3 U1 125.3(3) . . ? 
C15 Si3 U1 65.77(18) . . ? 
N2 Si4 C18 111.4(2) . . ? 
N2 Si4 C20 113.2(3) . . ? 
C18 Si4 C20 105.2(3) . . ? 
N2 Si4 C19 111.0(3) . . ? 
C18 Si4 C19 108.7(3) . . ? 
C20 Si4 C19 107.1(3) . . ? 
C2 C1 C2 120.9(9) 2_655 . ? 
C2 C1 U1 72.2(3) 2_655 . ? 
C2 C1 U1 75.9(4) . . ? 
C2 C1 U1 75.9(4) 2_655 2_655 ? 
C2 C1 U1 72.2(3) . 2_655 ? 
U1 C1 U1 112.2(4) . 2_655 ? 
C2 C1 H1 119.5 2_655 . ? 
C2 C1 H1 119.5 . . ? 
U1 C1 H1 123.9 . . ? 
U1 C1 H1 123.9 2_655 . ? 
C1 C2 C3 119.6(8) . . ? 
C1 C2 U1 75.1(3) . 2_655 ? 
C3 C2 U1 77.0(4) . 2_655 ? 
C1 C2 U1 72.0(3) . . ? 
C3 C2 U1 70.6(4) . . ? 
U1 C2 U1 111.8(3) 2_655 . ? 
C1 C2 H2 120.2 . . ? 
C3 C2 H2 120.2 . . ? 
U1 C2 H2 118.6 2_655 . ? 
U1 C2 H2 129.5 . . ? 
C2 C3 C4 121.3(8) . . ? 
C2 C3 U1 77.1(4) . . ? 
C4 C3 U1 75.7(3) . . ? 
C2 C3 U1 70.6(4) . 2_655 ? 
C4 C3 U1 73.1(3) . 2_655 ? 
U1 C3 U1 111.9(3) . 2_655 ? 
C2 C3 H3 119.3 . . ? 
C4 C3 H3 119.3 . . ? 
U1 C3 H3 118.7 . . ? 
U1 C3 H3 129.4 2_655 . ? 
C5 C4 C3 121.8(4) . 2_655 ? 
C5 C4 C3 121.8(4) . . ? 
C3 C4 C3 116.3(8) 2_655 . ? 
C5 C4 U1 124.91(17) . 2_655 ? 
C3 C4 U1 70.8(3) 2_655 2_655 ? 
C3 C4 U1 74.0(3) . 2_655 ? 
C5 C4 U1 124.91(17) . . ? 
C3 C4 U1 74.0(3) 2_655 . ? 
C3 C4 U1 70.8(3) . . ? 
U1 C4 U1 110.2(3) 2_655 . ? 
C6 C5 C6 114.9(8) . 2_655 ? 
C6 C5 C4 122.6(4) . . ? 
C6 C5 C4 122.6(4) 2_655 . ? 
C7 C6 C5 123.8(8) . . ? 
C7 C6 H6 118.1 . . ? 
C5 C6 H6 118.1 . . ? 
C6 C7 C8 119.7(9) . . ? 
C6 C7 H7 120.1 . . ? 
C8 C7 H7 120.1 . . ? 
C7 C8 C7 118.0(11) 2_655 . ? 
C7 C8 H8 121.0 2_655 . ? 
C7 C8 H8 121.0 . . ? 
Si1 C9 H9A 109.5 . . ? 
Si1 C9 H9B 109.5 . . ? 
H9A C9 H9B 109.5 . . ? 
Si1 C9 H9C 109.5 . . ? 
H9A C9 H9C 109.5 . . ? 
H9B C9 H9C 109.5 . . ? 
Si1 C10 H10A 109.5 . . ? 
Si1 C10 H10B 109.5 . . ? 
H10A C10 H10B 109.5 . . ? 
Si1 C10 H10C 109.5 . . ? 
H10A C10 H10C 109.5 . . ? 
H10B C10 H10C 109.5 . . ? 
Si1 C11 H11A 109.5 . . ? 
Si1 C11 H11B 109.5 . . ? 
H11A C11 H11B 109.5 . . ? 
Si1 C11 H11C 109.5 . . ? 
H11A C11 H11C 109.5 . . ? 
H11B C11 H11C 109.5 . . ? 
Si2 C12 H12A 109.5 . . ? 
Si2 C12 H12B 109.5 . . ? 
H12A C12 H12B 109.5 . . ? 
Si2 C12 H12C 109.5 . . ? 
H12A C12 H12C 109.5 . . ? 
H12B C12 H12C 109.5 . . ? 
Si2 C13 H13A 109.5 . . ? 
Si2 C13 H13B 109.5 . . ? 
H13A C13 H13B 109.5 . . ? 
Si2 C13 H13C 109.5 . . ? 
H13A C13 H13C 109.5 . . ? 
H13B C13 H13C 109.5 . . ? 
Si2 C14 H14A 109.5 . . ? 
Si2 C14 H14B 109.5 . . ? 
H14A C14 H14B 109.5 . . ? 
Si2 C14 H14C 109.5 . . ? 
H14A C14 H14C 109.5 . . ? 
H14B C14 H14C 109.5 . . ? 
Si3 C15 H15A 109.5 . . ? 
Si3 C15 H15B 109.5 . . ? 
H15A C15 H15B 109.5 . . ? 
Si3 C15 H15C 109.5 . . ? 
H15A C15 H15C 109.5 . . ? 
H15B C15 H15C 109.5 . . ? 
Si3 C16 H16A 109.5 . . ? 
Si3 C16 H16B 109.5 . . ? 
H16A C16 H16B 109.5 . . ? 
Si3 C16 H16C 109.5 . . ? 
H16A C16 H16C 109.5 . . ? 
H16B C16 H16C 109.5 . . ? 
Si3 C17 H17A 109.5 . . ? 
Si3 C17 H17B 109.5 . . ? 
H17A C17 H17B 109.5 . . ? 
Si3 C17 H17C 109.5 . . ? 
H17A C17 H17C 109.5 . . ? 
H17B C17 H17C 109.5 . . ? 
Si4 C18 H18A 109.5 . . ? 
Si4 C18 H18B 109.5 . . ? 
H18A C18 H18B 109.5 . . ? 
Si4 C18 H18C 109.5 . . ? 
H18A C18 H18C 109.5 . . ? 
H18B C18 H18C 109.5 . . ? 
Si4 C19 H19A 109.5 . . ? 
Si4 C19 H19B 109.5 . . ? 
H19A C19 H19B 109.5 . . ? 
Si4 C19 H19C 109.5 . . ? 
H19A C19 H19C 109.5 . . ? 
H19B C19 H19C 109.5 . . ? 
Si4 C20 H20A 109.5 . . ? 
Si4 C20 H20B 109.5 . . ? 
H20A C20 H20B 109.5 . . ? 
Si4 C20 H20C 109.5 . . ? 
H20A C20 H20C 109.5 . . ? 
H20B C20 H20C 109.5 . . ? 
 
loop_ 
 _geom_torsion_atom_site_label_1 
 _geom_torsion_atom_site_label_2 
 _geom_torsion_atom_site_label_3 
 _geom_torsion_atom_site_label_4 
 _geom_torsion 
 _geom_torsion_site_symmetry_1 
 _geom_torsion_site_symmetry_2 
 _geom_torsion_site_symmetry_3 
 _geom_torsion_site_symmetry_4 
 _geom_torsion_publ_flag 
N2 U1 N1 Si1 84.3(2) . . . . ? 
C2 U1 N1 Si1 -52.4(3) 2_655 . . . ? 
C3 U1 N1 Si1 -130.6(3) . . . . ? 
C1 U1 N1 Si1 -72.0(2) . . . . ? 
C4 U1 N1 Si1 -135.4(3) . . . . ? 
C3 U1 N1 Si1 -72.1(5) 2_655 . . . ? 
C2 U1 N1 Si1 -103.7(3) . . . . ? 
Si3 U1 N1 Si1 113.2(2) . . . . ? 
N2 U1 N1 Si2 -99.8(3) . . . . ? 
C2 U1 N1 Si2 123.5(3) 2_655 . . . ? 
C3 U1 N1 Si2 45.3(3) . . . . ? 
C1 U1 N1 Si2 103.9(3) . . . . ? 
C4 U1 N1 Si2 40.5(5) . . . . ? 
C3 U1 N1 Si2 103.8(5) 2_655 . . . ? 
C2 U1 N1 Si2 72.2(3) . . . . ? 
Si1 U1 N1 Si2 175.9(5) . . . . ? 
Si3 U1 N1 Si2 -70.9(3) . . . . ? 
N1 U1 N2 Si4 -104.6(3) . . . . ? 
C2 U1 N2 Si4 37.3(3) 2_655 . . . ? 
C3 U1 N2 Si4 118.3(3) . . . . ? 
C1 U1 N2 Si4 31.0(5) . . . . ? 
C4 U1 N2 Si4 98.1(3) . . . . ? 
C3 U1 N2 Si4 65.3(3) 2_655 . . . ? 
C2 U1 N2 Si4 97.4(5) . . . . ? 
Si1 U1 N2 Si4 -74.8(3) . . . . ? 
Si3 U1 N2 Si4 179.4(5) . . . . ? 
N1 U1 N2 Si3 76.0(3) . . . . ? 
C2 U1 N2 Si3 -142.1(2) 2_655 . . . ? 
C3 U1 N2 Si3 -61.1(3) . . . . ? 
C1 U1 N2 Si3 -148.4(3) . . . . ? 
C4 U1 N2 Si3 -81.3(2) . . . . ? 
C3 U1 N2 Si3 -114.1(2) 2_655 . . . ? 
C2 U1 N2 Si3 -82.0(5) . . . . ? 
Si1 U1 N2 Si3 105.87(19) . . . . ? 
Si2 N1 Si1 C10 58.5(4) . . . . ? 
U1 N1 Si1 C10 -125.1(3) . . . . ? 
Si2 N1 Si1 C9 174.1(3) . . . . ? 
U1 N1 Si1 C9 -9.5(3) . . . . ? 
Si2 N1 Si1 C11 -69.2(4) . . . . ? 
U1 N1 Si1 C11 107.2(3) . . . . ? 
Si2 N1 Si1 U1 -176.4(4) . . . . ? 
N2 U1 Si1 N1 -104.3(3) . . . . ? 
C2 U1 Si1 N1 137.4(3) 2_655 . . . ? 
C3 U1 Si1 N1 62.8(3) . . . . ? 
C1 U1 Si1 N1 109.1(2) . . . . ? 
C4 U1 Si1 N1 92.7(3) . . . . ? 
C3 U1 Si1 N1 143.2(3) 2_655 . . . ? 
C2 U1 Si1 N1 78.6(3) . . . . ? 
Si3 U1 Si1 N1 -74.2(2) . . . . ? 
N1 U1 Si1 C10 79.7(4) . . . . ? 
N2 U1 Si1 C10 -24.6(4) . . . . ? 
C2 U1 Si1 C10 -142.9(4) 2_655 . . . ? 
C3 U1 Si1 C10 142.5(4) . . . . ? 
C1 U1 Si1 C10 -171.2(3) . . . . ? 
C4 U1 Si1 C10 172.4(3) . . . . ? 
C3 U1 Si1 C10 -137.1(4) 2_655 . . . ? 
C2 U1 Si1 C10 158.3(4) . . . . ? 
Si3 U1 Si1 C10 5.5(3) . . . . ? 
N1 U1 Si1 C9 170.2(3) . . . . ? 
N2 U1 Si1 C9 65.9(3) . . . . ? 
C2 U1 Si1 C9 -52.3(3) 2_655 . . . ? 
C3 U1 Si1 C9 -127.0(3) . . . . ? 
C1 U1 Si1 C9 -80.7(2) . . . . ? 
C4 U1 Si1 C9 -97.1(3) . . . . ? 
C3 U1 Si1 C9 -46.6(3) 2_655 . . . ? 
C2 U1 Si1 C9 -111.2(3) . . . . ? 
Si3 U1 Si1 C9 96.0(2) . . . . ? 
N1 U1 Si1 C11 -93.8(3) . . . . ? 
N2 U1 Si1 C11 161.9(3) . . . . ? 
C2 U1 Si1 C11 43.7(3) 2_655 . . . ? 
C3 U1 Si1 C11 -30.9(3) . . . . ? 
C1 U1 Si1 C11 15.3(3) . . . . ? 
C4 U1 Si1 C11 -1.1(3) . . . . ? 
C3 U1 Si1 C11 49.4(3) 2_655 . . . ? 
C2 U1 Si1 C11 -15.2(3) . . . . ? 
Si3 U1 Si1 C11 -168.0(3) . . . . ? 
Si1 N1 Si2 C12 150.1(3) . . . . ? 
U1 N1 Si2 C12 -25.5(4) . . . . ? 
Si1 N1 Si2 C13 -86.8(3) . . . . ? 
U1 N1 Si2 C13 97.7(3) . . . . ? 
Si1 N1 Si2 C14 32.6(4) . . . . ? 
U1 N1 Si2 C14 -143.0(3) . . . . ? 
Si4 N2 Si3 C17 -64.1(4) . . . . ? 
U1 N2 Si3 C17 115.3(3) . . . . ? 
Si4 N2 Si3 C16 62.2(4) . . . . ? 
U1 N2 Si3 C16 -118.4(3) . . . . ? 
Si4 N2 Si3 C15 179.6(3) . . . . ? 
U1 N2 Si3 C15 -0.9(3) . . . . ? 
Si4 N2 Si3 U1 -179.4(4) . . . . ? 
N1 U1 Si3 N2 -111.4(3) . . . . ? 
C2 U1 Si3 N2 52.0(3) 2_655 . . . ? 
C3 U1 Si3 N2 132.6(3) . . . . ? 
C1 U1 Si3 N2 86.0(3) . . . . ? 
C4 U1 Si3 N2 102.5(2) . . . . ? 
C3 U1 Si3 N2 71.0(3) 2_655 . . . ? 
C2 U1 Si3 N2 143.8(3) . . . . ? 
Si1 U1 Si3 N2 -83.0(2) . . . . ? 
N1 U1 Si3 C17 159.0(3) . . . . ? 
N2 U1 Si3 C17 -89.7(4) . . . . ? 
C2 U1 Si3 C17 -37.7(4) 2_655 . . . ? 
C3 U1 Si3 C17 43.0(3) . . . . ? 
C1 U1 Si3 C17 -3.6(4) . . . . ? 
C4 U1 Si3 C17 12.8(3) . . . . ? 
C3 U1 Si3 C17 -18.6(3) 2_655 . . . ? 
C2 U1 Si3 C17 54.1(4) . . . . ? 
Si1 U1 Si3 C17 -172.7(3) . . . . ? 
N1 U1 Si3 C16 -27.1(3) . . . . ? 
N2 U1 Si3 C16 84.3(4) . . . . ? 
C2 U1 Si3 C16 136.2(3) 2_655 . . . ? 
C3 U1 Si3 C16 -143.1(3) . . . . ? 
C1 U1 Si3 C16 170.3(3) . . . . ? 
C4 U1 Si3 C16 -173.2(3) . . . . ? 
C3 U1 Si3 C16 155.3(3) 2_655 . . . ? 
C2 U1 Si3 C16 -131.9(4) . . . . ? 
Si1 U1 Si3 C16 1.3(3) . . . . ? 
N1 U1 Si3 C15 67.7(2) . . . . ? 
N2 U1 Si3 C15 179.0(3) . . . . ? 
C2 U1 Si3 C15 -129.0(3) 2_655 . . . ? 
C3 U1 Si3 C15 -48.3(3) . . . . ? 
C1 U1 Si3 C15 -94.9(3) . . . . ? 
C4 U1 Si3 C15 -78.5(2) . . . . ? 
C3 U1 Si3 C15 -109.9(3) 2_655 . . . ? 
C2 U1 Si3 C15 -37.2(3) . . . . ? 
Si1 U1 Si3 C15 96.0(2) . . . . ? 
Si3 N2 Si4 C18 162.3(3) . . . . ? 
U1 N2 Si4 C18 -17.0(4) . . . . ? 
Si3 N2 Si4 C20 44.0(4) . . . . ? 
U1 N2 Si4 C20 -135.3(3) . . . . ? 
Si3 N2 Si4 C19 -76.4(4) . . . . ? 
U1 N2 Si4 C19 104.2(3) . . . . ? 
N1 U1 C1 C2 149.0(4) . . . 2_655 ? 
N2 U1 C1 C2 10.7(6) . . . 2_655 ? 
C3 U1 C1 C2 -101.5(5) . . . 2_655 ? 
C4 U1 C1 C2 -65.9(4) . . . 2_655 ? 
C3 U1 C1 C2 -31.1(4) 2_655 . . 2_655 ? 
C2 U1 C1 C2 -129.6(7) . . . 2_655 ? 
Si1 U1 C1 C2 121.4(4) . . . 2_655 ? 
Si3 U1 C1 C2 -48.3(5) . . . 2_655 ? 
N1 U1 C1 C2 -81.4(4) . . . . ? 
N2 U1 C1 C2 140.3(3) . . . . ? 
C2 U1 C1 C2 129.6(7) 2_655 . . . ? 
C3 U1 C1 C2 28.1(4) . . . . ? 
C4 U1 C1 C2 63.7(4) . . . . ? 
C3 U1 C1 C2 98.5(5) 2_655 . . . ? 
Si1 U1 C1 C2 -109.0(4) . . . . ? 
Si3 U1 C1 C2 81.3(3) . . . . ? 
N1 U1 C1 U1 -145.13(11) . . . 2_655 ? 
N2 U1 C1 U1 76.6(3) . . . 2_655 ? 
C2 U1 C1 U1 65.9(4) 2_655 . . 2_655 ? 
C3 U1 C1 U1 -35.6(2) . . . 2_655 ? 
C4 U1 C1 U1 0.0 . . . 2_655 ? 
C3 U1 C1 U1 34.82(19) 2_655 . . 2_655 ? 
C2 U1 C1 U1 -63.7(4) . . . 2_655 ? 
Si1 U1 C1 U1 -172.71(4) . . . 2_655 ? 
Si3 U1 C1 U1 17.6(2) . . . 2_655 ? 
C2 C1 C2 C3 4.6(5) 2_655 . . . ? 
U1 C1 C2 C3 -54.2(6) . . . . ? 
U1 C1 C2 C3 65.2(6) 2_655 . . . ? 
C2 C1 C2 U1 -60.59(15) 2_655 . . 2_655 ? 
U1 C1 C2 U1 -119.4(2) . . . 2_655 ? 
C2 C1 C2 U1 58.79(16) 2_655 . . . ? 
U1 C1 C2 U1 119.4(2) 2_655 . . . ? 
N1 U1 C2 C1 100.9(4) . . . . ? 
N2 U1 C2 C1 -99.9(6) . . . . ? 
C2 U1 C2 C1 -29.4(4) 2_655 . . . ? 
C3 U1 C2 C1 -131.6(7) . . . . ? 
C4 U1 C2 C1 -100.7(4) . . . . ? 
C3 U1 C2 C1 -64.7(4) 2_655 . . . ? 
Si1 U1 C2 C1 72.4(4) . . . . ? 
Si3 U1 C2 C1 -151.4(3) . . . . ? 
N1 U1 C2 C3 -127.5(5) . . . . ? 
N2 U1 C2 C3 31.8(9) . . . . ? 
C2 U1 C2 C3 102.2(5) 2_655 . . . ? 
C1 U1 C2 C3 131.6(7) . . . . ? 
C4 U1 C2 C3 30.9(4) . . . . ? 
C3 U1 C2 C3 66.9(5) 2_655 . . . ? 
Si1 U1 C2 C3 -156.0(5) . . . . ? 
Si3 U1 C2 C3 -19.8(6) . . . . ? 
N1 U1 C2 U1 166.0(3) . . . 2_655 ? 
N2 U1 C2 U1 -34.7(7) . . . 2_655 ? 
C2 U1 C2 U1 35.7(3) 2_655 . . 2_655 ? 
C3 U1 C2 U1 -66.5(4) . . . 2_655 ? 
C1 U1 C2 U1 65.1(4) . . . 2_655 ? 
C4 U1 C2 U1 -35.6(2) . . . 2_655 ? 
C3 U1 C2 U1 0.4(3) 2_655 . . 2_655 ? 
Si1 U1 C2 U1 137.5(2) . . . 2_655 ? 
Si3 U1 C2 U1 -86.3(3) . . . 2_655 ? 
C1 C2 C3 C4 -9.3(9) . . . . ? 
U1 C2 C3 C4 54.9(5) 2_655 . . . ? 
U1 C2 C3 C4 -64.2(5) . . . . ? 
C1 C2 C3 U1 54.8(5) . . . . ? 
U1 C2 C3 U1 119.09(12) 2_655 . . . ? 
C1 C2 C3 U1 -64.2(5) . . . 2_655 ? 
U1 C2 C3 U1 -119.09(12) . . . 2_655 ? 
N1 U1 C3 C2 57.7(5) . . . . ? 
N2 U1 C3 C2 -165.7(4) . . . . ? 
C2 U1 C3 C2 -62.3(5) 2_655 . . . ? 
C1 U1 C3 C2 -27.9(4) . . . . ? 
C4 U1 C3 C2 -127.5(7) . . . . ? 
C3 U1 C3 C2 -96.4(5) 2_655 . . . ? 
Si1 U1 C3 C2 30.3(6) . . . . ? 
Si3 U1 C3 C2 167.0(4) . . . . ? 
N1 U1 C3 C4 -174.8(4) . . . . ? 
N2 U1 C3 C4 -38.2(5) . . . . ? 
C2 U1 C3 C4 65.2(4) 2_655 . . . ? 
C1 U1 C3 C4 99.6(3) . . . . ? 
C3 U1 C3 C4 31.1(4) 2_655 . . . ? 
C2 U1 C3 C4 127.5(7) . . . . ? 
Si1 U1 C3 C4 157.7(3) . . . . ? 
Si3 U1 C3 C4 -65.5(4) . . . . ? 
N1 U1 C3 U1 120.4(2) . . . 2_655 ? 
N2 U1 C3 U1 -103.0(3) . . . 2_655 ? 
C2 U1 C3 U1 0.4(3) 2_655 . . 2_655 ? 
C1 U1 C3 U1 34.8(2) . . . 2_655 ? 
C4 U1 C3 U1 -64.8(4) . . . 2_655 ? 
C3 U1 C3 U1 -33.7(3) 2_655 . . 2_655 ? 
C2 U1 C3 U1 62.7(4) . . . 2_655 ? 
Si1 U1 C3 U1 93.0(3) . . . 2_655 ? 
Si3 U1 C3 U1 -130.3(2) . . . 2_655 ? 
C2 C3 C4 C5 -175.3(5) . . . . ? 
U1 C3 C4 C5 119.83(14) . . . . ? 
U1 C3 C4 C5 -121.52(16) 2_655 . . . ? 
C2 C3 C4 C3 4.7(5) . . . 2_655 ? 
U1 C3 C4 C3 -60.17(14) . . . 2_655 ? 
U1 C3 C4 C3 58.48(16) 2_655 . . 2_655 ? 
C2 C3 C4 U1 -53.8(6) . . . 2_655 ? 
U1 C3 C4 U1 -118.7(2) . . . 2_655 ? 
C2 C3 C4 U1 64.8(6) . . . . ? 
U1 C3 C4 U1 118.7(2) 2_655 . . . ? 
N1 U1 C4 C5 -107.8(3) . . . . ? 
N2 U1 C4 C5 34.37(11) . . . . ? 
C2 U1 C4 C5 145.05(19) 2_655 . . . ? 
C3 U1 C4 C5 -116.0(4) . . . . ? 
C1 U1 C4 C5 180.0 . . . . ? 
C3 U1 C4 C5 118.0(4) 2_655 . . . ? 
C2 U1 C4 C5 -145.94(19) . . . . ? 
Si1 U1 C4 C5 -162.40(14) . . . . ? 
Si3 U1 C4 C5 5.23(3) . . . . ? 
N1 U1 C4 C3 134.2(3) . . . 2_655 ? 
N2 U1 C4 C3 -83.6(4) . . . 2_655 ? 
C2 U1 C4 C3 27.1(4) 2_655 . . 2_655 ? 
C3 U1 C4 C3 126.0(7) . . . 2_655 ? 
C1 U1 C4 C3 62.0(4) . . . 2_655 ? 
C2 U1 C4 C3 96.1(4) . . . 2_655 ? 
Si1 U1 C4 C3 79.6(3) . . . 2_655 ? 
Si3 U1 C4 C3 -112.7(4) . . . 2_655 ? 
N1 U1 C4 C3 8.2(6) . . . . ? 
N2 U1 C4 C3 150.4(4) . . . . ? 
C2 U1 C4 C3 -98.9(5) 2_655 . . . ? 
C1 U1 C4 C3 -64.0(4) . . . . ? 
C3 U1 C4 C3 -126.0(7) 2_655 . . . ? 
C2 U1 C4 C3 -29.9(4) . . . . ? 
Si1 U1 C4 C3 -46.4(5) . . . . ? 
Si3 U1 C4 C3 121.2(4) . . . . ? 
N1 U1 C4 U1 72.2(3) . . . 2_655 ? 
N2 U1 C4 U1 -145.63(11) . . . 2_655 ? 
C2 U1 C4 U1 -34.95(19) 2_655 . . 2_655 ? 
C3 U1 C4 U1 64.0(4) . . . 2_655 ? 
C1 U1 C4 U1 0.0 . . . 2_655 ? 
C3 U1 C4 U1 -62.0(4) 2_655 . . 2_655 ? 
C2 U1 C4 U1 34.06(19) . . . 2_655 ? 
Si1 U1 C4 U1 17.60(14) . . . 2_655 ? 
Si3 U1 C4 U1 -174.77(3) . . . 2_655 ? 
C3 C4 C5 C6 178.5(4) 2_655 . . . ? 
C3 C4 C5 C6 -1.5(4) . . . . ? 
U1 C4 C5 C6 -93.6(3) 2_655 . . . ? 
U1 C4 C5 C6 86.4(3) . . . . ? 
C3 C4 C5 C6 -1.5(4) 2_655 . . 2_655 ? 
C3 C4 C5 C6 178.5(4) . . . 2_655 ? 
U1 C4 C5 C6 86.4(3) 2_655 . . 2_655 ? 
U1 C4 C5 C6 -93.6(3) . . . 2_655 ? 
C6 C5 C6 C7 -0.7(6) 2_655 . . . ? 
C4 C5 C6 C7 179.3(6) . . . . ? 
C5 C6 C7 C8 1.4(11) . . . . ? 
C6 C7 C8 C7 -0.7(5) . . . 2_655 ? 
 
_diffrn_measured_fraction_theta_max    0.998 
_diffrn_reflns_theta_full              27.48 
_diffrn_measured_fraction_theta_full   0.998 
_refine_diff_density_max    0.635 
_refine_diff_density_min   -0.622 
_refine_diff_density_rms    0.091
