# Supplementary material for: Spontaneous reduction and C–H borylation of arenes mediated by uranium(III) disproportionation
Source: Springer Nature journal article supplement (doi:10.1038/nchem.1392), 2012-07-13
Supplement: 41557_2012_BFnchem1392_MOESM17_ESM.mol [file 41557_2012_BFnchem1392_MOESM17_ESM.mol]

  ChemDraw06211206592D

 50 45  0  0  0  0  0  0  0  0999 V2000
   -2.4899    1.0445    0.0000 N   0  5  0  0  0  0  0  0  0  0  0  0
   -2.6461    1.9169    0.0000 Si  0  0  0  0  0  0  0  0  0  0  0  0
   -3.3617    2.3274    0.0000 C   0  0  0  0  0  0  0  0  0  0  0  0
   -2.6963    2.7403    0.0000 C   0  0  0  0  0  0  0  0  0  0  0  0
   -1.9857    2.4113    0.0000 C   0  0  0  0  0  0  0  0  0  0  0  0
   -3.3585    1.1372    0.0000 Si  0  0  0  0  0  0  0  0  0  0  0  0
   -3.8049    0.4434    0.0000 C   0  0  0  0  0  0  0  0  0  0  0  0
   -4.1834    1.1289    0.0000 C   0  0  0  0  0  0  0  0  0  0  0  0
   -3.8187    1.8219    0.0000 C   0  0  0  0  0  0  0  0  0  0  0  0
    2.4582   -1.2691    0.0000 N   0  5  0  0  0  0  0  0  0  0  0  0
    2.6144   -2.1414    0.0000 Si  0  0  0  0  0  0  0  0  0  0  0  0
    3.3300   -2.5520    0.0000 C   0  0  0  0  0  0  0  0  0  0  0  0
    2.6646   -2.9649    0.0000 C   0  0  0  0  0  0  0  0  0  0  0  0
    1.9540   -2.6358    0.0000 C   0  0  0  0  0  0  0  0  0  0  0  0
    3.3268   -1.3617    0.0000 Si  0  0  0  0  0  0  0  0  0  0  0  0
    3.7732   -0.6679    0.0000 C   0  0  0  0  0  0  0  0  0  0  0  0
    4.1517   -1.3534    0.0000 C   0  0  0  0  0  0  0  0  0  0  0  0
    3.7870   -2.0464    0.0000 C   0  0  0  0  0  0  0  0  0  0  0  0
   -2.0094   -1.4890    0.0000 N   0  5  0  0  0  0  0  0  0  0  0  0
   -2.1657   -2.3614    0.0000 Si  0  0  0  0  0  0  0  0  0  0  0  0
   -2.8813   -2.7720    0.0000 C   0  0  0  0  0  0  0  0  0  0  0  0
   -2.2159   -3.1849    0.0000 C   0  0  0  0  0  0  0  0  0  0  0  0
   -1.5053   -2.8558    0.0000 C   0  0  0  0  0  0  0  0  0  0  0  0
   -2.8780   -1.5817    0.0000 Si  0  0  0  0  0  0  0  0  0  0  0  0
   -3.3244   -0.8879    0.0000 C   0  0  0  0  0  0  0  0  0  0  0  0
   -3.7030   -1.5734    0.0000 C   0  0  0  0  0  0  0  0  0  0  0  0
   -3.3383   -2.2664    0.0000 C   0  0  0  0  0  0  0  0  0  0  0  0
    2.4899    1.2834    0.0000 N   0  5  0  0  0  0  0  0  0  0  0  0
    2.6461    2.1557    0.0000 Si  0  0  0  0  0  0  0  0  0  0  0  0
    3.3617    2.5663    0.0000 C   0  0  0  0  0  0  0  0  0  0  0  0
    2.6963    2.9792    0.0000 C   0  0  0  0  0  0  0  0  0  0  0  0
    1.9857    2.6501    0.0000 C   0  0  0  0  0  0  0  0  0  0  0  0
    3.3585    1.3760    0.0000 Si  0  0  0  0  0  0  0  0  0  0  0  0
    3.8049    0.6822    0.0000 C   0  0  0  0  0  0  0  0  0  0  0  0
    4.1834    1.3677    0.0000 C   0  0  0  0  0  0  0  0  0  0  0  0
    3.8187    2.0607    0.0000 C   0  0  0  0  0  0  0  0  0  0  0  0
   -1.5808   -0.1686    0.0000 U   0  1  0  0  0  0  0  0  0  0  0  0
    1.4838   -0.1450    0.0000 U   0  1  0  0  0  0  0  0  0  0  0  0
    0.1573   -0.9482    0.0000 C   0  0  0  0  0  0  0  0  0  0  0  0
    0.8675   -0.5241    0.0000 C   0  0  0  0  0  0  0  0  0  0  0  0
    0.8554    0.3031    0.0000 C   0  5  0  0  0  0  0  0  0  0  0  0
    0.1330    0.7061    0.0000 C   0  0  0  0  0  0  0  0  0  0  0  0
   -0.5773    0.2820    0.0000 C   0  0  0  0  0  0  0  0  0  0  0  0
   -0.5651   -0.5451    0.0000 C   0  5  0  0  0  0  0  0  0  0  0  0
    0.1208    1.5305    0.0000 C   0  0  0  0  0  0  0  0  0  0  0  0
    0.8401    1.9390    0.0000 C   0  0  0  0  0  0  0  0  0  0  0  0
    0.8401    2.7662    0.0000 C   0  0  0  0  0  0  0  0  0  0  0  0
    0.1208    3.1849    0.0000 C   0  0  0  0  0  0  0  0  0  0  0  0
   -0.5985    2.7662    0.0000 C   0  0  0  0  0  0  0  0  0  0  0  0
   -0.5985    1.9390    0.0000 C   0  0  0  0  0  0  0  0  0  0  0  0
  2  1  1  0      
  1  6  1  0      
  2  3  1  0      
  2  4  1  0      
  2  5  1  0      
  6  7  1  0      
  6  8  1  0      
  6  9  1  0      
 11 10  1  0      
 10 15  1  0      
 11 12  1  0      
 11 13  1  0      
 11 14  1  0      
 15 16  1  0      
 15 17  1  0      
 15 18  1  0      
 20 19  1  0      
 19 24  1  0      
 20 21  1  0      
 20 22  1  0      
 20 23  1  0      
 24 25  1  0      
 24 26  1  0      
 24 27  1  0      
 29 28  1  0      
 28 33  1  0      
 29 30  1  0      
 29 31  1  0      
 29 32  1  0      
 33 34  1  0      
 33 35  1  0      
 33 36  1  0      
 39 40  2  0      
 40 41  1  0      
 41 42  1  0      
 42 43  2  0      
 43 44  1  0      
 44 39  1  0      
 42 45  1  0      
 45 46  2  0      
 46 47  1  0      
 47 48  2  0      
 48 49  1  0      
 49 50  2  0      
 50 45  1  0      
M  CHG  8   1  -1  10  -1  19  -1  28  -1  37   3  38   3  41  -1  44  -1
M  END
