# Supplementary material for: Spontaneous reduction and C–H borylation of arenes mediated by uranium(III) disproportionation
Source: Springer Nature journal article supplement (doi:10.1038/nchem.1392), 2012-07-13
Supplement: 41557_2012_BFnchem1392_MOESM21_ESM.cif [file 41557_2012_BFnchem1392_MOESM21_ESM.cif]

#==============================================================================

# SUBMISSION DETAILS

_publ_contact_author_name             'Polly L Arnold'
_publ_contact_author_email            'Polly.Arnold@ed.ac.uk'
_publ_contact_author_fax              '+44 131 650 6453'
_publ_contact_author_phone            '+44 131 650 5429'
_publ_requested_journal               'Nature Chemistry'

#==============================================================================

# TITLE AND AUTHOR LIST

_publ_section_title
;
Spontaneous reduction and C-H borylation of arenes mediated by 
uranium(III) disproportionation
;
_publ_section_title_footnote
;
CCDC number 855811
;
loop_
_publ_author_name
;
Polly L. Arnold, Stephen M. Mansell, Laurent Maron and David McKay
;
_publ_author_address
;
EaStCHEM School of Chemistry,
Joseph Black Building, University of Edinburgh,
The King's Buildings, Edinburgh, EH9 3JJ, UK.
;

#==============================================================================
data_(DtbpO)2U(C6H5BBN)U(ODtbp)2_complex_6 
 
_audit_creation_method            SHELXL-97 
_chemical_name_systematic 
; 
 ? 
; 
_chemical_name_common             ? 
_chemical_melting_point           ? 
_chemical_formula_moiety          'C70 H103 B O4 U2, C6 H6' 
_chemical_formula_sum 
 'C76 H109 B O4 U2' 
_chemical_formula_weight          1573.50 
 
loop_ 
 _atom_type_symbol 
 _atom_type_description 
 _atom_type_scat_dispersion_real 
 _atom_type_scat_dispersion_imag 
 _atom_type_scat_source 
 'C'  'C'   0.0033   0.0016 
 'International Tables Vol C Tables 4.2.6.8 and 6.1.1.4' 
 'H'  'H'   0.0000   0.0000 
 'International Tables Vol C Tables 4.2.6.8 and 6.1.1.4' 
 'B'  'B'   0.0013   0.0007 
 'International Tables Vol C Tables 4.2.6.8 and 6.1.1.4' 
 'O'  'O'   0.0106   0.0060 
 'International Tables Vol C Tables 4.2.6.8 and 6.1.1.4' 
 'U'  'U'  -9.6767   9.6646 
 'International Tables Vol C Tables 4.2.6.8 and 6.1.1.4' 
 
_symmetry_cell_setting            Monoclinic 
_symmetry_space_group_name_H-M    'C2/c'
_symmetry_space_group_name_Hall   '-C 2yc'
 
loop_ 
 _symmetry_equiv_pos_as_xyz 
 'x, y, z' 
 '-x, y, -z+1/2' 
 'x+1/2, y+1/2, z' 
 '-x+1/2, y+1/2, -z+1/2' 
 '-x, -y, -z' 
 'x, -y, z-1/2' 
 '-x+1/2, -y+1/2, -z' 
 'x+1/2, -y+1/2, z-1/2' 
 
_cell_length_a                    14.2651(4) 
_cell_length_b                    15.6815(5) 
_cell_length_c                    31.5761(10) 
_cell_angle_alpha                 90.00 
_cell_angle_beta                  97.149(3) 
_cell_angle_gamma                 90.00 
_cell_volume                      7008.6(4) 
_cell_formula_units_Z             4 
_cell_measurement_temperature     170(2) 
_cell_measurement_reflns_used   9891
_cell_measurement_theta_min     3.0907
_cell_measurement_theta_max     27.4232
 
_exptl_crystal_description        Plate
_exptl_crystal_colour             'Dark brown'
_exptl_crystal_size_max                            0.5333
_exptl_crystal_size_mid                            0.4620
_exptl_crystal_size_min                            0.0918
_exptl_crystal_density_meas       ? 
_exptl_crystal_density_diffrn     1.491 
_exptl_crystal_density_method     'not measured' 
_exptl_crystal_F_000              3144 
_exptl_absorpt_coefficient_mu     4.662 
_exptl_absorpt_correction_T_min                   0.29007
_exptl_absorpt_correction_T_max                   1.00000
_exptl_absorpt_correction_type            'multi-scan'
_exptl_absorpt_process_details
;
CrysAlisPro, Agilent Technologies,
Version 1.171.34.49 (release 20-01-2011 CrysAlis171 .NET)
(compiled Jan 20 2011,15:58:25)
Empirical absorption correction using spherical harmonics,
 implemented in SCALE3 ABSPACK scaling algorithm.
;
 
_exptl_special_details 
; 
 ? 
; 
 
_diffrn_ambient_temperature       170(2) 
_diffrn_radiation_wavelength      0.71073 
_diffrn_radiation_type            MoK\a 
_diffrn_radiation_source 'Enhance (Mo) X-ray Source'
_diffrn_radiation_monochromator 'graphite'
_diffrn_measurement_device_type 'Xcalibur, Eos'
_diffrn_measurement_method        '/w scans' 
_diffrn_detector_area_resol_mean  16.1042
_diffrn_standards_number          ? 
_diffrn_standards_interval_count  ? 
_diffrn_standards_interval_time   ? 
_diffrn_standards_decay_%         ? 
_diffrn_reflns_number             41271 
_diffrn_reflns_av_R_equivalents   0.0649 
_diffrn_reflns_av_sigmaI/netI     0.0506 
_diffrn_reflns_limit_h_min        -18 
_diffrn_reflns_limit_h_max        18 
_diffrn_reflns_limit_k_min        -20 
_diffrn_reflns_limit_k_max        20 
_diffrn_reflns_limit_l_min        -41 
_diffrn_reflns_limit_l_max        41 
_diffrn_reflns_theta_min          3.10 
_diffrn_reflns_theta_max          27.48 
_reflns_number_total              8041 
_reflns_number_gt                 6584 
_reflns_threshold_expression      >2sigma(I) 
 
_computing_data_collection
;
CrysAlisPro, Agilent Technologies,
Version 1.171.34.49 (release 20-01-2011 CrysAlis171 .NET)
(compiled Jan 20 2011,15:58:25)
;
_computing_cell_refinement
;
CrysAlisPro, Agilent Technologies,
Version 1.171.34.49 (release 20-01-2011 CrysAlis171 .NET)
(compiled Jan 20 2011,15:58:25)
;
_computing_data_reduction
;
CrysAlisPro, Agilent Technologies,
Version 1.171.34.49 (release 20-01-2011 CrysAlis171 .NET)
(compiled Jan 20 2011,15:58:25)
;
_computing_structure_solution     'SHELXS-97 (Sheldrick, 1990)' 
_computing_structure_refinement   'SHELXL-97 (Sheldrick, 1997)' 
_computing_molecular_graphics     ? 
_computing_publication_material   ? 
 
_refine_special_details 
; 
 Refinement of F^2^ against ALL reflections.  The weighted R-factor wR and 
 goodness of fit S are based on F^2^, conventional R-factors R are based 
 on F, with F set to zero for negative F^2^. The threshold expression of 
 F^2^ > 2sigma(F^2^) is used only for calculating R-factors(gt) etc. and is 
 not relevant to the choice of reflections for refinement.  R-factors based 
 on F^2^ are statistically about twice as large as those based on F, and R- 
 factors based on ALL data will be even larger. 
; 
 
_refine_ls_structure_factor_coef  Fsqd  
_refine_ls_matrix_type            full 
_refine_ls_weighting_scheme       calc  
_refine_ls_weighting_details 
 'calc w=1/[\s^2^(Fo^2^)+(0.0123P)^2^+21.3807P] where P=(Fo^2^+2Fc^2^)/3' 
_atom_sites_solution_primary      direct 
_atom_sites_solution_secondary    difmap 
_atom_sites_solution_hydrogens    geom 
_refine_ls_hydrogen_treatment     constr 
_refine_ls_extinction_method      none 
_refine_ls_extinction_coef        ? 
_refine_ls_number_reflns          8041 
_refine_ls_number_parameters      388 
_refine_ls_number_restraints      4 
_refine_ls_R_factor_all           0.0571 
_refine_ls_R_factor_gt            0.0416 
_refine_ls_wR_factor_ref          0.0717 
_refine_ls_wR_factor_gt           0.0675 
_refine_ls_goodness_of_fit_ref    1.201 
_refine_ls_restrained_S_all       1.204 
_refine_ls_shift/su_max           0.005 
_refine_ls_shift/su_mean          0.000 
 
loop_ 
 _atom_site_label 
 _atom_site_type_symbol 
 _atom_site_fract_x 
 _atom_site_fract_y 
 _atom_site_fract_z 
 _atom_site_U_iso_or_equiv 
 _atom_site_adp_type 
 _atom_site_occupancy 
 _atom_site_symmetry_multiplicity 
 _atom_site_calc_flag 
 _atom_site_refinement_flags 
 _atom_site_disorder_assembly 
 _atom_site_disorder_group 
U1 U 0.444002(11) 0.231453(12) 0.684314(5) 0.01912(5) Uani 1 1 d . . . 
O1 O 0.3009(2) 0.1978(2) 0.66463(10) 0.0237(7) Uani 1 1 d . . . 
O2 O 0.5077(2) 0.2631(2) 0.62836(9) 0.0227(7) Uani 1 1 d . . . 
B1 B 0.5000 0.4204(5) 0.7500 0.0200(16) Uani 1 2 d S . . 
C1 C 0.5000 0.3230(4) 0.7500 0.0178(14) Uani 1 2 d S . . 
C2 C 0.5833(3) 0.2725(3) 0.74122(14) 0.0220(10) Uani 1 1 d . . . 
H2 H 0.6398 0.3015 0.7368 0.026 Uiso 1 1 calc R . . 
C3 C 0.5811(3) 0.1805(3) 0.73916(14) 0.0207(10) Uani 1 1 d . . . 
H3 H 0.6333 0.1501 0.7306 0.025 Uiso 1 1 calc R . . 
C4 C 0.5000 0.1349(4) 0.7500 0.0277(17) Uani 1 2 d S . . 
H4 H 0.5000 0.0743 0.7500 0.033 Uiso 1 2 calc SR . . 
C5 C 0.5877(3) 0.4775(3) 0.74281(16) 0.0251(11) Uani 1 1 d . . . 
H5 H 0.6423 0.4398 0.7384 0.030 Uiso 1 1 calc R . . 
C6 C 0.6136(3) 0.5315(3) 0.78317(16) 0.0295(12) Uani 1 1 d . . . 
H6A H 0.6408 0.4933 0.8065 0.035 Uiso 1 1 calc R . . 
H6B H 0.6636 0.5724 0.7776 0.035 Uiso 1 1 calc R . . 
C7 C 0.5592(3) 0.5301(3) 0.70202(16) 0.0326(13) Uani 1 1 d . . . 
H7A H 0.6114 0.5699 0.6982 0.039 Uiso 1 1 calc R . . 
H7B H 0.5522 0.4907 0.6773 0.039 Uiso 1 1 calc R . . 
C8 C 0.4679(3) 0.5817(4) 0.70131(17) 0.0365(13) Uani 1 1 d . . . 
H8A H 0.4480 0.6016 0.6718 0.044 Uiso 1 1 calc R . . 
H8B H 0.4808 0.6328 0.7195 0.044 Uiso 1 1 calc R . . 
C9 C 0.2157(3) 0.1761(3) 0.64285(15) 0.0219(10) Uani 1 1 d . . . 
C10 C 0.1364(3) 0.2290(3) 0.64505(15) 0.0256(10) Uani 1 1 d . . . 
C11 C 0.0547(3) 0.2084(4) 0.61851(17) 0.0345(13) Uani 1 1 d . . . 
H11 H 0.0010 0.2443 0.6183 0.041 Uiso 1 1 calc R . . 
C12 C 0.0487(4) 0.1378(4) 0.59254(17) 0.0381(14) Uani 1 1 d . . . 
H12 H -0.0077 0.1267 0.5741 0.046 Uiso 1 1 calc R . . 
C13 C 0.1245(4) 0.0833(4) 0.59330(16) 0.0334(13) Uani 1 1 d . . . 
H13 H 0.1186 0.0335 0.5761 0.040 Uiso 1 1 calc R . . 
C14 C 0.2099(3) 0.0996(3) 0.61880(16) 0.0254(11) Uani 1 1 d . . . 
C15 C 0.1373(3) 0.3026(3) 0.67729(18) 0.0317(12) Uani 1 1 d . . . 
C16 C 0.2087(4) 0.3726(3) 0.6690(2) 0.0449(16) Uani 1 1 d . . . 
H16A H 0.2730 0.3498 0.6746 0.067 Uiso 1 1 calc R . . 
H16B H 0.2019 0.4212 0.6879 0.067 Uiso 1 1 calc R . . 
H16C H 0.1964 0.3913 0.6392 0.067 Uiso 1 1 calc R . . 
C17 C 0.1606(4) 0.2685(4) 0.72281(17) 0.0377(13) Uani 1 1 d . . . 
H17A H 0.1096 0.2309 0.7295 0.057 Uiso 1 1 calc R . . 
H17B H 0.1672 0.3164 0.7429 0.057 Uiso 1 1 calc R . . 
H17C H 0.2200 0.2364 0.7251 0.057 Uiso 1 1 calc R . . 
C18 C 0.0406(4) 0.3474(4) 0.6750(2) 0.0520(17) Uani 1 1 d . . . 
H18A H 0.0242 0.3721 0.6465 0.078 Uiso 1 1 calc R . . 
H18B H 0.0439 0.3928 0.6965 0.078 Uiso 1 1 calc R . . 
H18C H -0.0077 0.3058 0.6805 0.078 Uiso 1 1 calc R . . 
C19 C 0.2898(4) 0.0330(3) 0.6225(2) 0.0371(14) Uani 1 1 d . . . 
C20 C 0.3817(4) 0.0690(4) 0.6100(3) 0.090(3) Uani 1 1 d . . . 
H20A H 0.4186 0.0945 0.6351 0.134 Uiso 1 1 calc R . . 
H20B H 0.3675 0.1126 0.5880 0.134 Uiso 1 1 calc R . . 
H20C H 0.4183 0.0229 0.5990 0.134 Uiso 1 1 calc R . . 
C21 C 0.3059(4) -0.0017(4) 0.6683(2) 0.0587(19) Uani 1 1 d . . . 
H21A H 0.3591 -0.0416 0.6710 0.088 Uiso 1 1 calc R . . 
H21B H 0.2488 -0.0313 0.6747 0.088 Uiso 1 1 calc R . . 
H21C H 0.3200 0.0457 0.6883 0.088 Uiso 1 1 calc R . . 
C22 C 0.2650(4) -0.0436(4) 0.5931(2) 0.0487(16) Uani 1 1 d . . . 
H22A H 0.2537 -0.0240 0.5634 0.073 Uiso 1 1 calc R . . 
H22B H 0.2079 -0.0713 0.6008 0.073 Uiso 1 1 calc R . . 
H22C H 0.3174 -0.0843 0.5962 0.073 Uiso 1 1 calc R . . 
C23 C 0.5433(3) 0.2818(3) 0.59125(14) 0.0196(10) Uani 1 1 d . . . 
C24 C 0.4916(3) 0.3348(3) 0.56075(15) 0.0230(10) Uani 1 1 d . . . 
C25 C 0.5301(4) 0.3518(4) 0.52332(16) 0.0370(14) Uani 1 1 d . . . 
H25 H 0.4964 0.3876 0.5025 0.044 Uiso 1 1 calc R . . 
C26 C 0.6151(4) 0.3184(4) 0.51557(17) 0.0439(16) Uani 1 1 d . . . 
H26 H 0.6399 0.3315 0.4898 0.053 Uiso 1 1 calc R . . 
C27 C 0.6643(3) 0.2657(4) 0.54553(16) 0.0343(12) Uani 1 1 d . . . 
H27 H 0.7229 0.2425 0.5398 0.041 Uiso 1 1 calc R . . 
C28 C 0.6310(3) 0.2457(3) 0.58363(15) 0.0207(10) Uani 1 1 d . . . 
C29 C 0.3949(3) 0.3737(3) 0.56705(16) 0.0262(11) Uani 1 1 d . . . 
C30 C 0.3206(3) 0.3024(3) 0.56791(16) 0.0325(12) Uani 1 1 d . . . 
H30A H 0.3139 0.2716 0.5407 0.049 Uiso 1 1 calc R . . 
H30B H 0.2597 0.3276 0.5724 0.049 Uiso 1 1 calc R . . 
H30C H 0.3410 0.2627 0.5912 0.049 Uiso 1 1 calc R . . 
C31 C 0.4027(3) 0.4269(3) 0.60816(17) 0.0325(13) Uani 1 1 d . . . 
H31A H 0.4247 0.3906 0.6326 0.049 Uiso 1 1 calc R . . 
H31B H 0.3406 0.4507 0.6118 0.049 Uiso 1 1 calc R . . 
H31C H 0.4478 0.4735 0.6063 0.049 Uiso 1 1 calc R . . 
C32 C 0.3579(4) 0.4347(4) 0.53061(18) 0.0433(15) Uani 1 1 d . . . 
H32A H 0.4044 0.4799 0.5282 0.065 Uiso 1 1 calc R . . 
H32B H 0.2982 0.4602 0.5367 0.065 Uiso 1 1 calc R . . 
H32C H 0.3473 0.4030 0.5037 0.065 Uiso 1 1 calc R . . 
C33 C 0.6916(3) 0.1899(3) 0.61693(15) 0.0254(11) Uani 1 1 d . . . 
C34 C 0.7253(3) 0.2436(3) 0.65643(16) 0.0331(13) Uani 1 1 d . . . 
H34A H 0.7685 0.2880 0.6488 0.050 Uiso 1 1 calc R . . 
H34B H 0.7583 0.2069 0.6786 0.050 Uiso 1 1 calc R . . 
H34C H 0.6708 0.2702 0.6672 0.050 Uiso 1 1 calc R . . 
C35 C 0.6376(4) 0.1108(3) 0.62881(18) 0.0366(13) Uani 1 1 d . . . 
H35A H 0.5815 0.1286 0.6416 0.055 Uiso 1 1 calc R . . 
H35B H 0.6784 0.0763 0.6493 0.055 Uiso 1 1 calc R . . 
H35C H 0.6181 0.0771 0.6031 0.055 Uiso 1 1 calc R . . 
C36 C 0.7811(3) 0.1564(4) 0.59947(17) 0.0383(14) Uani 1 1 d . . . 
H36A H 0.7628 0.1226 0.5737 0.057 Uiso 1 1 calc R . . 
H36B H 0.8174 0.1207 0.6211 0.057 Uiso 1 1 calc R . . 
H36C H 0.8201 0.2047 0.5926 0.057 Uiso 1 1 calc R . . 
C37 C 0.5103(8) 0.0878(6) 0.4952(3) 0.115(4) Uani 1 1 d D . . 
H37 H 0.5159 0.1476 0.4912 0.139 Uiso 1 1 calc R . . 
C38 C 0.5874(6) 0.0381(8) 0.5057(3) 0.116(4) Uani 1 1 d D . . 
H38 H 0.6486 0.0629 0.5104 0.139 Uiso 1 1 calc R . . 
C39 C 0.5764(7) -0.0479(8) 0.5094(4) 0.140(5) Uani 1 1 d D . . 
H39 H 0.6314 -0.0821 0.5156 0.167 Uiso 1 1 calc R . . 
 
loop_ 
 _atom_site_aniso_label 
 _atom_site_aniso_U_11 
 _atom_site_aniso_U_22 
 _atom_site_aniso_U_33 
 _atom_site_aniso_U_23 
 _atom_site_aniso_U_13 
 _atom_site_aniso_U_12 
U1 0.01776(8) 0.02466(9) 0.01509(9) 0.00036(9) 0.00269(6) -0.00279(8) 
O1 0.0190(16) 0.0249(18) 0.0269(19) -0.0037(15) 0.0020(14) -0.0005(13) 
O2 0.0236(16) 0.0264(18) 0.0191(16) 0.0078(15) 0.0060(13) 0.0011(14) 
B1 0.025(4) 0.015(4) 0.021(4) 0.000 0.005(3) 0.000 
C1 0.018(3) 0.021(4) 0.013(3) 0.000 0.000(3) 0.000 
C2 0.019(2) 0.029(3) 0.019(2) -0.005(2) 0.0053(18) -0.004(2) 
C3 0.022(2) 0.024(3) 0.016(2) -0.004(2) 0.0057(19) 0.006(2) 
C4 0.038(4) 0.015(4) 0.030(4) 0.000 0.003(3) 0.000 
C5 0.025(2) 0.021(3) 0.031(3) -0.003(2) 0.008(2) 0.000(2) 
C6 0.023(3) 0.032(3) 0.032(3) -0.003(2) -0.001(2) 0.002(2) 
C7 0.032(3) 0.042(3) 0.025(3) 0.003(2) 0.006(2) -0.011(2) 
C8 0.036(3) 0.042(4) 0.030(3) 0.019(3) -0.005(2) -0.003(2) 
C9 0.018(2) 0.025(3) 0.021(3) 0.005(2) -0.0007(19) -0.0065(19) 
C10 0.021(2) 0.028(3) 0.028(3) 0.009(2) 0.003(2) -0.004(2) 
C11 0.022(3) 0.046(4) 0.035(3) 0.011(3) 0.001(2) 0.000(2) 
C12 0.025(3) 0.065(4) 0.023(3) 0.006(3) -0.005(2) -0.009(3) 
C13 0.038(3) 0.041(3) 0.021(3) -0.006(2) 0.005(2) -0.013(2) 
C14 0.022(2) 0.031(3) 0.025(3) 0.002(2) 0.008(2) -0.007(2) 
C15 0.025(3) 0.027(3) 0.044(3) 0.003(3) 0.009(2) 0.001(2) 
C16 0.047(3) 0.023(3) 0.069(5) 0.001(3) 0.024(3) 0.000(2) 
C17 0.034(3) 0.040(3) 0.041(3) -0.009(3) 0.011(2) -0.005(3) 
C18 0.040(3) 0.050(4) 0.067(5) -0.005(3) 0.010(3) 0.012(3) 
C19 0.030(3) 0.030(3) 0.053(4) -0.009(3) 0.011(3) -0.007(2) 
C20 0.046(4) 0.035(4) 0.199(10) -0.040(5) 0.060(5) -0.015(3) 
C21 0.059(4) 0.050(4) 0.061(5) -0.007(4) -0.016(4) 0.024(3) 
C22 0.053(4) 0.034(4) 0.060(4) -0.014(3) 0.013(3) -0.007(3) 
C23 0.025(2) 0.018(3) 0.016(2) 0.0000(19) 0.0033(18) -0.0043(18) 
C24 0.024(2) 0.027(3) 0.018(2) 0.002(2) 0.004(2) 0.003(2) 
C25 0.039(3) 0.051(4) 0.022(3) 0.014(3) 0.009(2) 0.014(3) 
C26 0.046(3) 0.065(4) 0.024(3) 0.017(3) 0.021(3) 0.017(3) 
C27 0.032(3) 0.047(3) 0.026(3) 0.003(3) 0.012(2) 0.011(3) 
C28 0.024(2) 0.017(3) 0.022(2) -0.0003(19) 0.0046(19) 0.0022(18) 
C29 0.028(3) 0.029(3) 0.023(3) 0.008(2) 0.007(2) 0.007(2) 
C30 0.033(3) 0.043(3) 0.021(3) 0.001(2) 0.003(2) 0.002(2) 
C31 0.031(3) 0.022(3) 0.046(4) 0.005(3) 0.013(3) 0.006(2) 
C32 0.041(3) 0.052(4) 0.038(4) 0.019(3) 0.008(3) 0.021(3) 
C33 0.027(3) 0.028(3) 0.021(3) 0.000(2) 0.004(2) 0.006(2) 
C34 0.028(3) 0.043(4) 0.028(3) 0.003(2) 0.000(2) 0.004(2) 
C35 0.040(3) 0.028(3) 0.040(4) 0.009(3) 0.003(3) 0.009(2) 
C36 0.033(3) 0.050(4) 0.032(3) 0.004(3) 0.004(2) 0.020(3) 
C37 0.090(7) 0.127(9) 0.124(9) -0.043(7) -0.006(7) -0.010(7) 
C38 0.056(6) 0.165(12) 0.122(9) -0.071(9) -0.005(6) -0.008(7) 
C39 0.078(8) 0.155(13) 0.177(13) -0.055(10) -0.021(7) 0.013(8) 
 
_geom_special_details 
; 
 All esds (except the esd in the dihedral angle between two l.s. planes) 
 are estimated using the full covariance matrix.  The cell esds are taken 
 into account individually in the estimation of esds in distances, angles 
 and torsion angles; correlations between esds in cell parameters are only 
 used when they are defined by crystal symmetry.  An approximate (isotropic) 
 treatment of cell esds is used for estimating esds involving l.s. planes. 
; 
 
loop_ 
 _geom_bond_atom_site_label_1 
 _geom_bond_atom_site_label_2 
 _geom_bond_distance 
 _geom_bond_site_symmetry_2 
 _geom_bond_publ_flag 
U1 O1 2.125(3) . ? 
U1 O2 2.143(3) . ? 
U1 C2 2.515(4) 2_656 ? 
U1 C1 2.567(4) . ? 
U1 C3 2.573(4) . ? 
U1 C2 2.589(4) . ? 
U1 C3 2.611(4) 2_656 ? 
U1 C4 2.612(4) . ? 
O1 C9 1.364(5) . ? 
O2 C23 1.366(5) . ? 
B1 C1 1.528(10) . ? 
B1 C5 1.578(6) . ? 
B1 C5 1.578(6) 2_656 ? 
C1 C2 1.483(5) 2_656 ? 
C1 C2 1.483(5) . ? 
C1 U1 2.567(4) 2_656 ? 
C2 C3 1.444(6) . ? 
C2 U1 2.515(4) 2_656 ? 
C2 H2 0.9500 . ? 
C3 C4 1.438(5) . ? 
C3 U1 2.612(4) 2_656 ? 
C3 H3 0.9500 . ? 
C4 C3 1.438(5) 2_656 ? 
C4 U1 2.612(4) 2_656 ? 
C4 H4 0.9500 . ? 
C5 C6 1.536(7) . ? 
C5 C7 1.541(7) . ? 
C5 H5 1.0000 . ? 
C6 C8 1.535(6) 2_656 ? 
C6 H6A 0.9900 . ? 
C6 H6B 0.9900 . ? 
C7 C8 1.532(7) . ? 
C7 H7A 0.9900 . ? 
C7 H7B 0.9900 . ? 
C8 C6 1.535(6) 2_656 ? 
C8 H8A 0.9900 . ? 
C8 H8B 0.9900 . ? 
C9 C10 1.411(6) . ? 
C9 C14 1.417(7) . ? 
C10 C11 1.386(7) . ? 
C10 C15 1.537(7) . ? 
C11 C12 1.373(7) . ? 
C11 H11 0.9500 . ? 
C12 C13 1.376(7) . ? 
C12 H12 0.9500 . ? 
C13 C14 1.398(7) . ? 
C13 H13 0.9500 . ? 
C14 C19 1.539(7) . ? 
C15 C17 1.531(7) . ? 
C15 C16 1.541(7) . ? 
C15 C18 1.541(7) . ? 
C16 H16A 0.9800 . ? 
C16 H16B 0.9800 . ? 
C16 H16C 0.9800 . ? 
C17 H17A 0.9800 . ? 
C17 H17B 0.9800 . ? 
C17 H17C 0.9800 . ? 
C18 H18A 0.9800 . ? 
C18 H18B 0.9800 . ? 
C18 H18C 0.9800 . ? 
C19 C20 1.525(7) . ? 
C19 C22 1.533(7) . ? 
C19 C21 1.533(8) . ? 
C20 H20A 0.9800 . ? 
C20 H20B 0.9800 . ? 
C20 H20C 0.9800 . ? 
C21 H21A 0.9800 . ? 
C21 H21B 0.9800 . ? 
C21 H21C 0.9800 . ? 
C22 H22A 0.9800 . ? 
C22 H22B 0.9800 . ? 
C22 H22C 0.9800 . ? 
C23 C24 1.409(6) . ? 
C23 C28 1.421(6) . ? 
C24 C25 1.390(6) . ? 
C24 C29 1.544(6) . ? 
C25 C26 1.370(7) . ? 
C25 H25 0.9500 . ? 
C26 C27 1.381(7) . ? 
C26 H26 0.9500 . ? 
C27 C28 1.384(6) . ? 
C27 H27 0.9500 . ? 
C28 C33 1.547(6) . ? 
C29 C31 1.536(7) . ? 
C29 C32 1.539(7) . ? 
C29 C30 1.543(7) . ? 
C30 H30A 0.9800 . ? 
C30 H30B 0.9800 . ? 
C30 H30C 0.9800 . ? 
C31 H31A 0.9800 . ? 
C31 H31B 0.9800 . ? 
C31 H31C 0.9800 . ? 
C32 H32A 0.9800 . ? 
C32 H32B 0.9800 . ? 
C32 H32C 0.9800 . ? 
C33 C35 1.530(7) . ? 
C33 C34 1.532(7) . ? 
C33 C36 1.545(6) . ? 
C34 H34A 0.9800 . ? 
C34 H34B 0.9800 . ? 
C34 H34C 0.9800 . ? 
C35 H35A 0.9800 . ? 
C35 H35B 0.9800 . ? 
C35 H35C 0.9800 . ? 
C36 H36A 0.9800 . ? 
C36 H36B 0.9800 . ? 
C36 H36C 0.9800 . ? 
C37 C38 1.355(8) . ? 
C37 C39 1.378(6) 5_656 ? 
C37 H37 0.9500 . ? 
C38 C39 1.364(8) . ? 
C38 H38 0.9500 . ? 
C39 C37 1.378(6) 5_656 ? 
C39 H39 0.9500 . ? 
 
loop_ 
 _geom_angle_atom_site_label_1 
 _geom_angle_atom_site_label_2 
 _geom_angle_atom_site_label_3 
 _geom_angle 
 _geom_angle_site_symmetry_1 
 _geom_angle_site_symmetry_3 
 _geom_angle_publ_flag 
O1 U1 O2 107.86(12) . . ? 
O1 U1 C2 94.70(13) . 2_656 ? 
O2 U1 C2 147.43(14) . 2_656 ? 
O1 U1 C1 124.49(8) . . ? 
O2 U1 C1 114.56(11) . . ? 
C2 U1 C1 33.92(12) 2_656 . ? 
O1 U1 C3 137.89(14) . . ? 
O2 U1 C3 105.19(12) . . ? 
C2 U1 C3 69.10(13) 2_656 . ? 
C1 U1 C3 59.70(14) . . ? 
O1 U1 C2 153.02(13) . . ? 
O2 U1 C2 98.46(13) . . ? 
C2 U1 C2 58.84(17) 2_656 . ? 
C1 U1 C2 33.43(11) . . ? 
C3 U1 C2 32.48(14) . . ? 
O1 U1 C3 87.55(13) . 2_656 ? 
O2 U1 C3 162.67(12) . 2_656 ? 
C2 U1 C3 32.65(14) 2_656 2_656 ? 
C1 U1 C3 59.21(14) . 2_656 ? 
C3 U1 C3 57.48(17) . 2_656 ? 
C2 U1 C3 67.41(13) . 2_656 ? 
O1 U1 C4 106.02(11) . . ? 
O2 U1 C4 132.04(9) . . ? 
C2 U1 C4 58.23(15) 2_656 . ? 
C1 U1 C4 69.44(16) . . ? 
C3 U1 C4 32.18(11) . . ? 
C2 U1 C4 57.35(15) . . ? 
C3 U1 C4 31.95(11) 2_656 . ? 
C9 O1 U1 166.7(3) . . ? 
C23 O2 U1 176.6(3) . . ? 
C1 B1 C5 124.6(3) . . ? 
C1 B1 C5 124.6(3) . 2_656 ? 
C5 B1 C5 110.9(6) . 2_656 ? 
C2 C1 C2 115.5(6) 2_656 . ? 
C2 C1 B1 122.3(3) 2_656 . ? 
C2 C1 B1 122.3(3) . . ? 
C2 C1 U1 71.1(2) 2_656 . ? 
C2 C1 U1 74.1(2) . . ? 
B1 C1 U1 124.00(12) . . ? 
C2 C1 U1 74.1(2) 2_656 2_656 ? 
C2 C1 U1 71.1(2) . 2_656 ? 
B1 C1 U1 123.99(12) . 2_656 ? 
U1 C1 U1 112.0(2) . 2_656 ? 
C3 C2 C1 121.9(4) . . ? 
C3 C2 U1 77.4(3) . 2_656 ? 
C1 C2 U1 75.0(2) . 2_656 ? 
C3 C2 U1 73.1(3) . . ? 
C1 C2 U1 72.4(2) . . ? 
U1 C2 U1 112.98(17) 2_656 . ? 
C3 C2 H2 119.1 . . ? 
C1 C2 H2 119.1 . . ? 
U1 C2 H2 119.5 2_656 . ? 
U1 C2 H2 127.5 . . ? 
C4 C3 C2 120.0(4) . . ? 
C4 C3 U1 75.4(2) . . ? 
C2 C3 U1 74.4(3) . . ? 
C4 C3 U1 74.0(2) . 2_656 ? 
C2 C3 U1 70.0(2) . 2_656 ? 
U1 C3 U1 110.34(16) . 2_656 ? 
C4 C3 H3 120.0 . . ? 
C2 C3 H3 120.0 . . ? 
U1 C3 H3 121.4 . . ? 
U1 C3 H3 128.1 2_656 . ? 
C3 C4 C3 120.3(6) 2_656 . ? 
C3 C4 U1 74.0(3) 2_656 . ? 
C3 C4 U1 72.4(3) . . ? 
C3 C4 U1 72.4(3) 2_656 2_656 ? 
C3 C4 U1 74.0(3) . 2_656 ? 
U1 C4 U1 109.1(2) . 2_656 ? 
C3 C4 H4 119.9 2_656 . ? 
C3 C4 H4 119.9 . . ? 
U1 C4 H4 125.4 . . ? 
U1 C4 H4 125.4 2_656 . ? 
C6 C5 C7 114.2(4) . . ? 
C6 C5 B1 107.9(4) . . ? 
C7 C5 B1 107.0(4) . . ? 
C6 C5 H5 109.2 . . ? 
C7 C5 H5 109.2 . . ? 
B1 C5 H5 109.2 . . ? 
C8 C6 C5 115.7(4) 2_656 . ? 
C8 C6 H6A 108.3 2_656 . ? 
C5 C6 H6A 108.3 . . ? 
C8 C6 H6B 108.3 2_656 . ? 
C5 C6 H6B 108.3 . . ? 
H6A C6 H6B 107.4 . . ? 
C8 C7 C5 115.5(4) . . ? 
C8 C7 H7A 108.4 . . ? 
C5 C7 H7A 108.4 . . ? 
C8 C7 H7B 108.4 . . ? 
C5 C7 H7B 108.4 . . ? 
H7A C7 H7B 107.5 . . ? 
C7 C8 C6 113.6(4) . 2_656 ? 
C7 C8 H8A 108.8 . . ? 
C6 C8 H8A 108.8 2_656 . ? 
C7 C8 H8B 108.8 . . ? 
C6 C8 H8B 108.8 2_656 . ? 
H8A C8 H8B 107.7 . . ? 
O1 C9 C10 119.9(4) . . ? 
O1 C9 C14 118.0(4) . . ? 
C10 C9 C14 122.1(4) . . ? 
C11 C10 C9 116.8(5) . . ? 
C11 C10 C15 120.8(4) . . ? 
C9 C10 C15 122.2(4) . . ? 
C12 C11 C10 122.3(5) . . ? 
C12 C11 H11 118.8 . . ? 
C10 C11 H11 118.8 . . ? 
C11 C12 C13 119.9(5) . . ? 
C11 C12 H12 120.0 . . ? 
C13 C12 H12 120.0 . . ? 
C12 C13 C14 121.6(5) . . ? 
C12 C13 H13 119.2 . . ? 
C14 C13 H13 119.2 . . ? 
C13 C14 C9 116.8(4) . . ? 
C13 C14 C19 120.3(5) . . ? 
C9 C14 C19 122.7(4) . . ? 
C17 C15 C10 110.0(4) . . ? 
C17 C15 C16 109.7(5) . . ? 
C10 C15 C16 111.9(4) . . ? 
C17 C15 C18 107.0(4) . . ? 
C10 C15 C18 112.2(4) . . ? 
C16 C15 C18 105.9(4) . . ? 
C15 C16 H16A 109.5 . . ? 
C15 C16 H16B 109.5 . . ? 
H16A C16 H16B 109.5 . . ? 
C15 C16 H16C 109.5 . . ? 
H16A C16 H16C 109.5 . . ? 
H16B C16 H16C 109.5 . . ? 
C15 C17 H17A 109.5 . . ? 
C15 C17 H17B 109.5 . . ? 
H17A C17 H17B 109.5 . . ? 
C15 C17 H17C 109.5 . . ? 
H17A C17 H17C 109.5 . . ? 
H17B C17 H17C 109.5 . . ? 
C15 C18 H18A 109.5 . . ? 
C15 C18 H18B 109.5 . . ? 
H18A C18 H18B 109.5 . . ? 
C15 C18 H18C 109.5 . . ? 
H18A C18 H18C 109.5 . . ? 
H18B C18 H18C 109.5 . . ? 
C20 C19 C22 105.9(5) . . ? 
C20 C19 C21 110.0(6) . . ? 
C22 C19 C21 106.9(5) . . ? 
C20 C19 C14 112.4(5) . . ? 
C22 C19 C14 111.9(5) . . ? 
C21 C19 C14 109.6(4) . . ? 
C19 C20 H20A 109.5 . . ? 
C19 C20 H20B 109.5 . . ? 
H20A C20 H20B 109.5 . . ? 
C19 C20 H20C 109.5 . . ? 
H20A C20 H20C 109.5 . . ? 
H20B C20 H20C 109.5 . . ? 
C19 C21 H21A 109.5 . . ? 
C19 C21 H21B 109.5 . . ? 
H21A C21 H21B 109.5 . . ? 
C19 C21 H21C 109.5 . . ? 
H21A C21 H21C 109.5 . . ? 
H21B C21 H21C 109.5 . . ? 
C19 C22 H22A 109.5 . . ? 
C19 C22 H22B 109.5 . . ? 
H22A C22 H22B 109.5 . . ? 
C19 C22 H22C 109.5 . . ? 
H22A C22 H22C 109.5 . . ? 
H22B C22 H22C 109.5 . . ? 
O2 C23 C24 119.6(4) . . ? 
O2 C23 C28 119.3(4) . . ? 
C24 C23 C28 121.1(4) . . ? 
C25 C24 C23 117.7(4) . . ? 
C25 C24 C29 119.2(4) . . ? 
C23 C24 C29 123.1(4) . . ? 
C26 C25 C24 122.1(5) . . ? 
C26 C25 H25 119.0 . . ? 
C24 C25 H25 119.0 . . ? 
C25 C26 C27 119.5(5) . . ? 
C25 C26 H26 120.2 . . ? 
C27 C26 H26 120.2 . . ? 
C26 C27 C28 122.1(4) . . ? 
C26 C27 H27 119.0 . . ? 
C28 C27 H27 119.0 . . ? 
C27 C28 C23 117.5(4) . . ? 
C27 C28 C33 119.8(4) . . ? 
C23 C28 C33 122.7(4) . . ? 
C31 C29 C32 106.0(4) . . ? 
C31 C29 C30 110.9(4) . . ? 
C32 C29 C30 106.9(4) . . ? 
C31 C29 C24 110.6(4) . . ? 
C32 C29 C24 112.2(4) . . ? 
C30 C29 C24 110.0(4) . . ? 
C29 C30 H30A 109.5 . . ? 
C29 C30 H30B 109.5 . . ? 
H30A C30 H30B 109.5 . . ? 
C29 C30 H30C 109.5 . . ? 
H30A C30 H30C 109.5 . . ? 
H30B C30 H30C 109.5 . . ? 
C29 C31 H31A 109.5 . . ? 
C29 C31 H31B 109.5 . . ? 
H31A C31 H31B 109.5 . . ? 
C29 C31 H31C 109.5 . . ? 
H31A C31 H31C 109.5 . . ? 
H31B C31 H31C 109.5 . . ? 
C29 C32 H32A 109.5 . . ? 
C29 C32 H32B 109.5 . . ? 
H32A C32 H32B 109.5 . . ? 
C29 C32 H32C 109.5 . . ? 
H32A C32 H32C 109.5 . . ? 
H32B C32 H32C 109.5 . . ? 
C35 C33 C34 111.3(4) . . ? 
C35 C33 C36 106.1(4) . . ? 
C34 C33 C36 106.7(4) . . ? 
C35 C33 C28 111.7(4) . . ? 
C34 C33 C28 109.5(4) . . ? 
C36 C33 C28 111.5(4) . . ? 
C33 C34 H34A 109.5 . . ? 
C33 C34 H34B 109.5 . . ? 
H34A C34 H34B 109.5 . . ? 
C33 C34 H34C 109.5 . . ? 
H34A C34 H34C 109.5 . . ? 
H34B C34 H34C 109.5 . . ? 
C33 C35 H35A 109.5 . . ? 
C33 C35 H35B 109.5 . . ? 
H35A C35 H35B 109.5 . . ? 
C33 C35 H35C 109.5 . . ? 
H35A C35 H35C 109.5 . . ? 
H35B C35 H35C 109.5 . . ? 
C33 C36 H36A 109.5 . . ? 
C33 C36 H36B 109.5 . . ? 
H36A C36 H36B 109.5 . . ? 
C33 C36 H36C 109.5 . . ? 
H36A C36 H36C 109.5 . . ? 
H36B C36 H36C 109.5 . . ? 
C38 C37 C39 117.1(9) . 5_656 ? 
C38 C37 H37 121.5 . . ? 
C39 C37 H37 121.5 5_656 . ? 
C37 C38 C39 119.5(9) . . ? 
C37 C38 H38 120.3 . . ? 
C39 C38 H38 120.3 . . ? 
C38 C39 C37 123.4(10) . 5_656 ? 
C38 C39 H39 118.3 . . ? 
C37 C39 H39 118.3 5_656 . ? 
 
loop_ 
 _geom_torsion_atom_site_label_1 
 _geom_torsion_atom_site_label_2 
 _geom_torsion_atom_site_label_3 
 _geom_torsion_atom_site_label_4 
 _geom_torsion 
 _geom_torsion_site_symmetry_1 
 _geom_torsion_site_symmetry_2 
 _geom_torsion_site_symmetry_3 
 _geom_torsion_site_symmetry_4 
 _geom_torsion_publ_flag 
O2 U1 O1 C9 11.6(13) . . . . ? 
C2 U1 O1 C9 167.8(13) 2_656 . . . ? 
C1 U1 O1 C9 150.4(13) . . . . ? 
C3 U1 O1 C9 -128.4(13) . . . . ? 
C2 U1 O1 C9 178.4(12) . . . . ? 
C3 U1 O1 C9 -160.3(13) 2_656 . . . ? 
C4 U1 O1 C9 -133.9(13) . . . . ? 
O1 U1 O2 C23 -5(5) . . . . ? 
C2 U1 O2 C23 -136(5) 2_656 . . . ? 
C1 U1 O2 C23 -148(5) . . . . ? 
C3 U1 O2 C23 149(5) . . . . ? 
C2 U1 O2 C23 -179(100) . . . . ? 
C3 U1 O2 C23 147(5) 2_656 . . . ? 
C4 U1 O2 C23 128(5) . . . . ? 
C5 B1 C1 C2 177.3(3) . . . 2_656 ? 
C5 B1 C1 C2 -2.7(3) 2_656 . . 2_656 ? 
C5 B1 C1 C2 -2.7(3) . . . . ? 
C5 B1 C1 C2 177.3(3) 2_656 . . . ? 
C5 B1 C1 U1 -94.7(2) . . . . ? 
C5 B1 C1 U1 85.3(2) 2_656 . . . ? 
C5 B1 C1 U1 85.3(2) . . . 2_656 ? 
C5 B1 C1 U1 -94.7(2) 2_656 . . 2_656 ? 
O1 U1 C1 C2 32.5(3) . . . 2_656 ? 
O2 U1 C1 C2 168.8(2) . . . 2_656 ? 
C3 U1 C1 C2 -97.4(3) . . . 2_656 ? 
C2 U1 C1 C2 -124.7(5) . . . 2_656 ? 
C3 U1 C1 C2 -29.5(3) 2_656 . . 2_656 ? 
C4 U1 C1 C2 -63.3(3) . . . 2_656 ? 
O1 U1 C1 C2 157.2(2) . . . . ? 
O2 U1 C1 C2 -66.5(3) . . . . ? 
C2 U1 C1 C2 124.7(5) 2_656 . . . ? 
C3 U1 C1 C2 27.3(3) . . . . ? 
C3 U1 C1 C2 95.2(3) 2_656 . . . ? 
C4 U1 C1 C2 61.5(3) . . . . ? 
O1 U1 C1 B1 -84.27(13) . . . . ? 
O2 U1 C1 B1 52.05(10) . . . . ? 
C2 U1 C1 B1 -116.7(3) 2_656 . . . ? 
C3 U1 C1 B1 145.87(12) . . . . ? 
C2 U1 C1 B1 118.5(3) . . . . ? 
C3 U1 C1 B1 -146.25(12) 2_656 . . . ? 
C4 U1 C1 B1 180.000(2) . . . . ? 
O1 U1 C1 U1 95.73(13) . . . 2_656 ? 
O2 U1 C1 U1 -127.95(10) . . . 2_656 ? 
C2 U1 C1 U1 63.3(3) 2_656 . . 2_656 ? 
C3 U1 C1 U1 -34.13(12) . . . 2_656 ? 
C2 U1 C1 U1 -61.5(3) . . . 2_656 ? 
C3 U1 C1 U1 33.75(12) 2_656 . . 2_656 ? 
C4 U1 C1 U1 0.0 . . . 2_656 ? 
C2 C1 C2 C3 3.2(3) 2_656 . . . ? 
B1 C1 C2 C3 -176.8(3) . . . . ? 
U1 C1 C2 C3 -56.3(4) . . . . ? 
U1 C1 C2 C3 64.3(4) 2_656 . . . ? 
C2 C1 C2 U1 -61.12(11) 2_656 . . 2_656 ? 
B1 C1 C2 U1 118.88(11) . . . 2_656 ? 
U1 C1 C2 U1 -120.59(15) . . . 2_656 ? 
C2 C1 C2 U1 59.47(11) 2_656 . . . ? 
B1 C1 C2 U1 -120.53(11) . . . . ? 
U1 C1 C2 U1 120.59(15) 2_656 . . . ? 
O1 U1 C2 C3 87.7(4) . . . . ? 
O2 U1 C2 C3 -105.1(3) . . . . ? 
C2 U1 C2 C3 100.0(3) 2_656 . . . ? 
C1 U1 C2 C3 132.4(4) . . . . ? 
C3 U1 C2 C3 64.5(3) 2_656 . . . ? 
C4 U1 C2 C3 30.1(2) . . . . ? 
O1 U1 C2 C1 -44.8(5) . . . . ? 
O2 U1 C2 C1 122.5(3) . . . . ? 
C2 U1 C2 C1 -32.4(3) 2_656 . . . ? 
C3 U1 C2 C1 -132.4(4) . . . . ? 
C3 U1 C2 C1 -67.9(3) 2_656 . . . ? 
C4 U1 C2 C1 -102.3(3) . . . . ? 
O1 U1 C2 U1 19.8(4) . . . 2_656 ? 
O2 U1 C2 U1 -172.93(18) . . . 2_656 ? 
C2 U1 C2 U1 32.1(2) 2_656 . . 2_656 ? 
C1 U1 C2 U1 64.5(2) . . . 2_656 ? 
C3 U1 C2 U1 -67.9(3) . . . 2_656 ? 
C3 U1 C2 U1 -3.36(18) 2_656 . . 2_656 ? 
C4 U1 C2 U1 -37.79(16) . . . 2_656 ? 
C1 C2 C3 C4 -6.4(6) . . . . ? 
U1 C2 C3 C4 56.7(3) 2_656 . . . ? 
U1 C2 C3 C4 -62.4(3) . . . . ? 
C1 C2 C3 U1 56.0(3) . . . . ? 
U1 C2 C3 U1 119.07(12) 2_656 . . . ? 
C1 C2 C3 U1 -63.1(3) . . . 2_656 ? 
U1 C2 C3 U1 -119.07(12) . . . 2_656 ? 
O1 U1 C3 C4 -9.9(4) . . . . ? 
O2 U1 C3 C4 -150.6(3) . . . . ? 
C2 U1 C3 C4 63.2(3) 2_656 . . . ? 
C1 U1 C3 C4 99.5(3) . . . . ? 
C2 U1 C3 C4 127.6(4) . . . . ? 
C3 U1 C3 C4 28.8(3) 2_656 . . . ? 
O1 U1 C3 C2 -137.5(2) . . . . ? 
O2 U1 C3 C2 81.8(3) . . . . ? 
C2 U1 C3 C2 -64.4(3) 2_656 . . . ? 
C1 U1 C3 C2 -28.1(2) . . . . ? 
C3 U1 C3 C2 -98.8(3) 2_656 . . . ? 
C4 U1 C3 C2 -127.6(4) . . . . ? 
O1 U1 C3 U1 -76.3(2) . . . 2_656 ? 
O2 U1 C3 U1 142.93(15) . . . 2_656 ? 
C2 U1 C3 U1 -3.28(18) 2_656 . . 2_656 ? 
C1 U1 C3 U1 33.04(13) . . . 2_656 ? 
C2 U1 C3 U1 61.1(2) . . . 2_656 ? 
C3 U1 C3 U1 -37.7(2) 2_656 . . 2_656 ? 
C4 U1 C3 U1 -66.5(3) . . . 2_656 ? 
C2 C3 C4 C3 3.1(3) . . . 2_656 ? 
U1 C3 C4 C3 -58.70(10) . . . 2_656 ? 
U1 C3 C4 C3 57.92(10) 2_656 . . 2_656 ? 
C2 C3 C4 U1 61.8(4) . . . . ? 
U1 C3 C4 U1 116.62(14) 2_656 . . . ? 
C2 C3 C4 U1 -54.8(4) . . . 2_656 ? 
U1 C3 C4 U1 -116.62(14) . . . 2_656 ? 
O1 U1 C4 C3 -57.0(3) . . . 2_656 ? 
O2 U1 C4 C3 169.5(2) . . . 2_656 ? 
C2 U1 C4 C3 28.5(3) 2_656 . . 2_656 ? 
C1 U1 C4 C3 64.4(3) . . . 2_656 ? 
C3 U1 C4 C3 129.9(5) . . . 2_656 ? 
C2 U1 C4 C3 99.5(3) . . . 2_656 ? 
O1 U1 C4 C3 173.1(3) . . . . ? 
O2 U1 C4 C3 39.6(4) . . . . ? 
C2 U1 C4 C3 -101.3(3) 2_656 . . . ? 
C1 U1 C4 C3 -65.4(3) . . . . ? 
C2 U1 C4 C3 -30.4(3) . . . . ? 
C3 U1 C4 C3 -129.9(5) 2_656 . . . ? 
O1 U1 C4 U1 -121.43(9) . . . 2_656 ? 
O2 U1 C4 U1 105.05(16) . . . 2_656 ? 
C2 U1 C4 U1 -35.88(13) 2_656 . . 2_656 ? 
C1 U1 C4 U1 0.0 . . . 2_656 ? 
C3 U1 C4 U1 65.4(3) . . . 2_656 ? 
C2 U1 C4 U1 35.08(12) . . . 2_656 ? 
C3 U1 C4 U1 -64.4(3) 2_656 . . 2_656 ? 
C1 B1 C5 C6 -118.8(3) . . . . ? 
C5 B1 C5 C6 61.2(3) 2_656 . . . ? 
C1 B1 C5 C7 118.0(3) . . . . ? 
C5 B1 C5 C7 -62.0(3) 2_656 . . . ? 
C7 C5 C6 C8 67.3(6) . . . 2_656 ? 
B1 C5 C6 C8 -51.5(6) . . . 2_656 ? 
C6 C5 C7 C8 -65.7(6) . . . . ? 
B1 C5 C7 C8 53.6(6) . . . . ? 
C5 C7 C8 C6 -45.2(6) . . . 2_656 ? 
U1 O1 C9 C10 -120.5(12) . . . . ? 
U1 O1 C9 C14 60.1(14) . . . . ? 
O1 C9 C10 C11 173.1(4) . . . . ? 
C14 C9 C10 C11 -7.5(7) . . . . ? 
O1 C9 C10 C15 -11.0(7) . . . . ? 
C14 C9 C10 C15 168.4(4) . . . . ? 
C9 C10 C11 C12 2.9(7) . . . . ? 
C15 C10 C11 C12 -173.1(5) . . . . ? 
C10 C11 C12 C13 2.1(8) . . . . ? 
C11 C12 C13 C14 -2.6(8) . . . . ? 
C12 C13 C14 C9 -1.8(7) . . . . ? 
C12 C13 C14 C19 173.6(5) . . . . ? 
O1 C9 C14 C13 -173.6(4) . . . . ? 
C10 C9 C14 C13 7.0(7) . . . . ? 
O1 C9 C14 C19 11.1(7) . . . . ? 
C10 C9 C14 C19 -168.3(4) . . . . ? 
C11 C10 C15 C17 118.0(5) . . . . ? 
C9 C10 C15 C17 -57.8(6) . . . . ? 
C11 C10 C15 C16 -119.8(5) . . . . ? 
C9 C10 C15 C16 64.4(6) . . . . ? 
C11 C10 C15 C18 -1.0(7) . . . . ? 
C9 C10 C15 C18 -176.7(5) . . . . ? 
C13 C14 C19 C20 123.7(6) . . . . ? 
C9 C14 C19 C20 -61.2(7) . . . . ? 
C13 C14 C19 C22 4.7(7) . . . . ? 
C9 C14 C19 C22 179.9(5) . . . . ? 
C13 C14 C19 C21 -113.6(6) . . . . ? 
C9 C14 C19 C21 61.5(6) . . . . ? 
U1 O2 C23 C24 51(5) . . . . ? 
U1 O2 C23 C28 -127(5) . . . . ? 
O2 C23 C24 C25 -179.6(4) . . . . ? 
C28 C23 C24 C25 -1.2(7) . . . . ? 
O2 C23 C24 C29 0.0(7) . . . . ? 
C28 C23 C24 C29 178.4(4) . . . . ? 
C23 C24 C25 C26 0.4(8) . . . . ? 
C29 C24 C25 C26 -179.2(5) . . . . ? 
C24 C25 C26 C27 0.5(9) . . . . ? 
C25 C26 C27 C28 -0.5(9) . . . . ? 
C26 C27 C28 C23 -0.2(8) . . . . ? 
C26 C27 C28 C33 -177.0(5) . . . . ? 
O2 C23 C28 C27 179.5(4) . . . . ? 
C24 C23 C28 C27 1.1(7) . . . . ? 
O2 C23 C28 C33 -3.8(7) . . . . ? 
C24 C23 C28 C33 177.8(4) . . . . ? 
C25 C24 C29 C31 -123.3(5) . . . . ? 
C23 C24 C29 C31 57.1(6) . . . . ? 
C25 C24 C29 C32 -5.1(7) . . . . ? 
C23 C24 C29 C32 175.3(5) . . . . ? 
C25 C24 C29 C30 113.9(5) . . . . ? 
C23 C24 C29 C30 -65.7(6) . . . . ? 
C27 C28 C33 C35 -124.0(5) . . . . ? 
C23 C28 C33 C35 59.3(6) . . . . ? 
C27 C28 C33 C34 112.3(5) . . . . ? 
C23 C28 C33 C34 -64.4(6) . . . . ? 
C27 C28 C33 C36 -5.6(6) . . . . ? 
C23 C28 C33 C36 177.8(4) . . . . ? 
C39 C37 C38 C39 2.6(19) 5_656 . . . ? 
C37 C38 C39 C37 -3(2) . . . 5_656 ? 
 
_diffrn_measured_fraction_theta_max    0.998 
_diffrn_reflns_theta_full              27.48 
_diffrn_measured_fraction_theta_full   0.998 
_refine_diff_density_max    2.141 
_refine_diff_density_min   -2.494 
_refine_diff_density_rms    0.132
