# Supplementary material for: Spontaneous reduction and C–H borylation of arenes mediated by uranium(III) disproportionation
Source: Springer Nature journal article supplement (doi:10.1038/nchem.1392), 2012-07-13
Supplement: 41557_2012_BFnchem1392_MOESM22_ESM.mol [file 41557_2012_BFnchem1392_MOESM22_ESM.mol]

  ChemDraw06211206592D

 77 77  0  0  0  0  0  0  0  0999 V2000
    3.7392   -1.6877    0.0000 C   0  0  0  0  0  0  0  0  0  0  0  0
    4.2982   -2.2952    0.0000 C   0  0  0  0  0  0  0  0  0  0  0  0
    4.0516   -3.0831    0.0000 C   0  0  0  0  0  0  0  0  0  0  0  0
    3.2460   -3.2635    0.0000 C   0  0  0  0  0  0  0  0  0  0  0  0
    2.6870   -2.6560    0.0000 C   0  0  0  0  0  0  0  0  0  0  0  0
    2.9336   -1.8681    0.0000 C   0  0  0  0  0  0  0  0  0  0  0  0
    2.3768   -1.2631    0.0000 O   0  5  0  0  0  0  0  0  0  0  0  0
    1.8846   -2.8356    0.0000 C   0  0  0  0  0  0  0  0  0  0  0  0
    1.6389   -3.6208    0.0000 C   0  0  0  0  0  0  0  0  0  0  0  0
    1.0817   -3.0154    0.0000 C   0  0  0  0  0  0  0  0  0  0  0  0
    1.3275   -2.2302    0.0000 C   0  0  0  0  0  0  0  0  0  0  0  0
    3.9848   -0.9030    0.0000 C   0  0  0  0  0  0  0  0  0  0  0  0
    3.4277   -0.2976    0.0000 C   0  0  0  0  0  0  0  0  0  0  0  0
    4.2306   -0.1178    0.0000 C   0  0  0  0  0  0  0  0  0  0  0  0
    4.7877   -0.7233    0.0000 C   0  0  0  0  0  0  0  0  0  0  0  0
   -3.9766    1.1981    0.0000 C   0  0  0  0  0  0  0  0  0  0  0  0
   -4.6424    1.6863    0.0000 C   0  0  0  0  0  0  0  0  0  0  0  0
   -4.5524    2.5069    0.0000 C   0  0  0  0  0  0  0  0  0  0  0  0
   -3.7968    2.8394    0.0000 C   0  0  0  0  0  0  0  0  0  0  0  0
   -3.1310    2.3512    0.0000 C   0  0  0  0  0  0  0  0  0  0  0  0
   -3.2210    1.5305    0.0000 C   0  0  0  0  0  0  0  0  0  0  0  0
   -2.5579    1.0443    0.0000 O   0  5  0  0  0  0  0  0  0  0  0  0
   -2.3784    2.6823    0.0000 C   0  0  0  0  0  0  0  0  0  0  0  0
   -2.2888    3.5001    0.0000 C   0  0  0  0  0  0  0  0  0  0  0  0
   -1.6253    3.0136    0.0000 C   0  0  0  0  0  0  0  0  0  0  0  0
   -1.7149    2.1957    0.0000 C   0  0  0  0  0  0  0  0  0  0  0  0
   -4.0662    0.3807    0.0000 C   0  0  0  0  0  0  0  0  0  0  0  0
   -3.4027   -0.1058    0.0000 C   0  0  0  0  0  0  0  0  0  0  0  0
   -4.1558   -0.4371    0.0000 C   0  0  0  0  0  0  0  0  0  0  0  0
   -4.8193    0.0494    0.0000 C   0  0  0  0  0  0  0  0  0  0  0  0
   -3.3259   -2.1760    0.0000 C   0  0  0  0  0  0  0  0  0  0  0  0
   -3.7493   -2.8847    0.0000 C   0  0  0  0  0  0  0  0  0  0  0  0
   -3.3473   -3.6057    0.0000 C   0  0  0  0  0  0  0  0  0  0  0  0
   -2.5218   -3.6180    0.0000 C   0  0  0  0  0  0  0  0  0  0  0  0
   -2.0984   -2.9093    0.0000 C   0  0  0  0  0  0  0  0  0  0  0  0
   -2.5005   -2.1883    0.0000 C   0  0  0  0  0  0  0  0  0  0  0  0
   -2.0788   -1.4825    0.0000 O   0  5  0  0  0  0  0  0  0  0  0  0
   -1.2763   -2.9216    0.0000 C   0  0  0  0  0  0  0  0  0  0  0  0
   -0.8756   -3.6402    0.0000 C   0  0  0  0  0  0  0  0  0  0  0  0
   -0.4536   -2.9339    0.0000 C   0  0  0  0  0  0  0  0  0  0  0  0
   -0.8543   -2.2153    0.0000 C   0  0  0  0  0  0  0  0  0  0  0  0
   -3.7263   -1.4578    0.0000 C   0  0  0  0  0  0  0  0  0  0  0  0
   -3.3044   -0.7515    0.0000 C   0  0  0  0  0  0  0  0  0  0  0  0
   -4.1270   -0.7392    0.0000 C   0  0  0  0  0  0  0  0  0  0  0  0
   -4.5490   -1.4455    0.0000 C   0  0  0  0  0  0  0  0  0  0  0  0
   -1.8092   -0.1264    0.0000 U   0  1  0  0  0  0  0  0  0  0  0  0
    3.7708    1.7071    0.0000 C   0  0  0  0  0  0  0  0  0  0  0  0
    4.3298    2.3146    0.0000 C   0  0  0  0  0  0  0  0  0  0  0  0
    4.0832    3.1025    0.0000 C   0  0  0  0  0  0  0  0  0  0  0  0
    3.2776    3.2829    0.0000 C   0  0  0  0  0  0  0  0  0  0  0  0
    2.7186    2.6754    0.0000 C   0  0  0  0  0  0  0  0  0  0  0  0
    2.9652    1.8875    0.0000 C   0  0  0  0  0  0  0  0  0  0  0  0
    2.4085    1.2825    0.0000 O   0  5  0  0  0  0  0  0  0  0  0  0
    1.9163    2.8550    0.0000 C   0  0  0  0  0  0  0  0  0  0  0  0
    1.6705    3.6402    0.0000 C   0  0  0  0  0  0  0  0  0  0  0  0
    1.1134    3.0348    0.0000 C   0  0  0  0  0  0  0  0  0  0  0  0
    1.3591    2.2496    0.0000 C   0  0  0  0  0  0  0  0  0  0  0  0
    4.0164    0.9225    0.0000 C   0  0  0  0  0  0  0  0  0  0  0  0
    3.4593    0.3170    0.0000 C   0  0  0  0  0  0  0  0  0  0  0  0
    4.2622    0.1372    0.0000 C   0  0  0  0  0  0  0  0  0  0  0  0
    4.8193    0.7427    0.0000 C   0  0  0  0  0  0  0  0  0  0  0  0
    1.2472   -0.1029    0.0000 U   0  1  0  0  0  0  0  0  0  0  0  0
   -0.1198   -0.8541    0.0000 C   0  0  0  0  0  0  0  0  0  0  0  0
    0.5885   -0.4312    0.0000 C   0  0  0  0  0  0  0  0  0  0  0  0
    0.5764    0.3937    0.0000 C   0  5  0  0  0  0  0  0  0  0  0  0
   -0.1441    0.7957    0.0000 C   0  0  0  0  0  0  0  0  0  0  0  0
   -0.8524    0.3727    0.0000 C   0  0  0  0  0  0  0  0  0  0  0  0
   -0.8403   -0.4522    0.0000 C   0  5  0  0  0  0  0  0  0  0  0  0
   -0.1600    1.3267    0.0000 C   0  0  0  0  0  0  0  0  0  0  0  0
    0.6111    1.6216    0.0000 C   0  0  0  0  0  0  0  0  0  0  0  0
    0.9477    2.3754    0.0000 C   0  0  0  0  0  0  0  0  0  0  0  0
    0.6528    3.1465    0.0000 C   0  0  0  0  0  0  0  0  0  0  0  0
   -0.1010    3.4831    0.0000 C   0  0  0  0  0  0  0  0  0  0  0  0
   -0.8721    3.1882    0.0000 C   0  0  0  0  0  0  0  0  0  0  0  0
   -1.2087    2.4344    0.0000 C   0  0  0  0  0  0  0  0  0  0  0  0
   -0.9138    1.6633    0.0000 C   0  0  0  0  0  0  0  0  0  0  0  0
   -0.1326    2.0751    0.0000 B   0  0  0  0  0  0  0  0  0  0  0  0
  1  2  2  0      
  2  3  1  0      
  3  4  2  0      
  4  5  1  0      
  5  6  2  0      
  6  1  1  0      
  6  7  1  0      
  5  8  1  0      
  1 12  1  0      
  8  9  1  0      
  8 10  1  0      
  8 11  1  0      
 12 13  1  0      
 12 14  1  0      
 12 15  1  0      
 16 17  2  0      
 17 18  1  0      
 18 19  2  0      
 19 20  1  0      
 20 21  2  0      
 21 16  1  0      
 21 22  1  0      
 20 23  1  0      
 16 27  1  0      
 23 24  1  0      
 23 25  1  0      
 23 26  1  0      
 27 28  1  0      
 27 29  1  0      
 27 30  1  0      
 31 32  2  0      
 32 33  1  0      
 33 34  2  0      
 34 35  1  0      
 35 36  2  0      
 36 31  1  0      
 36 37  1  0      
 35 38  1  0      
 31 42  1  0      
 38 39  1  0      
 38 40  1  0      
 38 41  1  0      
 42 43  1  0      
 42 44  1  0      
 42 45  1  0      
 47 48  2  0      
 48 49  1  0      
 49 50  2  0      
 50 51  1  0      
 51 52  2  0      
 52 47  1  0      
 52 53  1  0      
 51 54  1  0      
 47 58  1  0      
 54 55  1  0      
 54 56  1  0      
 54 57  1  0      
 58 59  1  0      
 58 60  1  0      
 58 61  1  0      
 63 64  2  0      
 64 65  1  0      
 65 66  1  0      
 66 67  2  0      
 67 68  1  0      
 68 63  1  0      
 69 70  1  0      
 70 71  1  0      
 71 72  1  0      
 72 73  1  0      
 73 74  1  0      
 74 75  1  0      
 75 76  1  0      
 76 69  1  0      
 75 77  1  1      
 71 77  1  1      
 77 66  1  0      
M  CHG  8   7  -1  22  -1  37  -1  46   3  53  -1  62   3  65  -1  68  -1
M  END
