# Supplementary material for: Spontaneous reduction and C–H borylation of arenes mediated by uranium(III) disproportionation
Source: Springer Nature journal article supplement (doi:10.1038/nchem.1392), 2012-07-13
Supplement: 41557_2012_BFnchem1392_MOESM28_ESM.mol [file 41557_2012_BFnchem1392_MOESM28_ESM.mol]

  ChemDraw06211206592D

 83 84  0  0  0  0  0  0  0  0999 V2000
    3.8181   -1.6079    0.0000 C   0  0  0  0  0  0  0  0  0  0  0  0
    4.3772   -2.2154    0.0000 C   0  0  0  0  0  0  0  0  0  0  0  0
    4.1306   -3.0032    0.0000 C   0  0  0  0  0  0  0  0  0  0  0  0
    3.3249   -3.1836    0.0000 C   0  0  0  0  0  0  0  0  0  0  0  0
    2.7659   -2.5761    0.0000 C   0  0  0  0  0  0  0  0  0  0  0  0
    3.0125   -1.7883    0.0000 C   0  0  0  0  0  0  0  0  0  0  0  0
    2.4558   -1.1832    0.0000 O   0  5  0  0  0  0  0  0  0  0  0  0
    1.9636   -2.7558    0.0000 C   0  0  0  0  0  0  0  0  0  0  0  0
    1.7178   -3.5410    0.0000 C   0  0  0  0  0  0  0  0  0  0  0  0
    1.1607   -2.9355    0.0000 C   0  0  0  0  0  0  0  0  0  0  0  0
    1.4064   -2.1503    0.0000 C   0  0  0  0  0  0  0  0  0  0  0  0
    4.0637   -0.8232    0.0000 C   0  0  0  0  0  0  0  0  0  0  0  0
    3.5066   -0.2177    0.0000 C   0  0  0  0  0  0  0  0  0  0  0  0
    4.3095   -0.0380    0.0000 C   0  0  0  0  0  0  0  0  0  0  0  0
    4.8666   -0.6434    0.0000 C   0  0  0  0  0  0  0  0  0  0  0  0
   -3.8977    1.2779    0.0000 C   0  0  0  0  0  0  0  0  0  0  0  0
   -4.5634    1.7661    0.0000 C   0  0  0  0  0  0  0  0  0  0  0  0
   -4.4735    2.5868    0.0000 C   0  0  0  0  0  0  0  0  0  0  0  0
   -3.7178    2.9192    0.0000 C   0  0  0  0  0  0  0  0  0  0  0  0
   -3.0521    2.4310    0.0000 C   0  0  0  0  0  0  0  0  0  0  0  0
   -3.1420    1.6104    0.0000 C   0  0  0  0  0  0  0  0  0  0  0  0
   -2.4790    1.1241    0.0000 O   0  5  0  0  0  0  0  0  0  0  0  0
   -2.2995    2.7621    0.0000 C   0  0  0  0  0  0  0  0  0  0  0  0
   -2.2099    3.5800    0.0000 C   0  0  0  0  0  0  0  0  0  0  0  0
   -1.5464    3.0934    0.0000 C   0  0  0  0  0  0  0  0  0  0  0  0
   -1.6360    2.2755    0.0000 C   0  0  0  0  0  0  0  0  0  0  0  0
   -3.9873    0.4606    0.0000 C   0  0  0  0  0  0  0  0  0  0  0  0
   -3.3238   -0.0260    0.0000 C   0  0  0  0  0  0  0  0  0  0  0  0
   -4.0769   -0.3573    0.0000 C   0  0  0  0  0  0  0  0  0  0  0  0
   -4.7404    0.1293    0.0000 C   0  0  0  0  0  0  0  0  0  0  0  0
   -3.7569   -2.0113    0.0000 C   0  0  0  0  0  0  0  0  0  0  0  0
   -4.2510   -2.6726    0.0000 C   0  0  0  0  0  0  0  0  0  0  0  0
   -3.9253   -3.4312    0.0000 C   0  0  0  0  0  0  0  0  0  0  0  0
   -3.1055   -3.5285    0.0000 C   0  0  0  0  0  0  0  0  0  0  0  0
   -2.6114   -2.8672    0.0000 C   0  0  0  0  0  0  0  0  0  0  0  0
   -2.9371   -2.1085    0.0000 C   0  0  0  0  0  0  0  0  0  0  0  0
   -2.4449   -1.4499    0.0000 O   0  5  0  0  0  0  0  0  0  0  0  0
   -1.7949   -2.9640    0.0000 C   0  0  0  0  0  0  0  0  0  0  0  0
   -1.4703   -3.7201    0.0000 C   0  0  0  0  0  0  0  0  0  0  0  0
   -0.9778   -3.0610    0.0000 C   0  0  0  0  0  0  0  0  0  0  0  0
   -1.3024   -2.3049    0.0000 C   0  0  0  0  0  0  0  0  0  0  0  0
   -4.0812   -1.2557    0.0000 C   0  0  0  0  0  0  0  0  0  0  0  0
   -3.5887   -0.5966    0.0000 C   0  0  0  0  0  0  0  0  0  0  0  0
   -4.4058   -0.4997    0.0000 C   0  0  0  0  0  0  0  0  0  0  0  0
   -4.8983   -1.1588    0.0000 C   0  0  0  0  0  0  0  0  0  0  0  0
   -1.7302   -0.0465    0.0000 U   0  1  0  0  0  0  0  0  0  0  0  0
    3.8498    1.7870    0.0000 C   0  0  0  0  0  0  0  0  0  0  0  0
    4.4088    2.3945    0.0000 C   0  0  0  0  0  0  0  0  0  0  0  0
    4.1622    3.1823    0.0000 C   0  0  0  0  0  0  0  0  0  0  0  0
    3.3566    3.3627    0.0000 C   0  0  0  0  0  0  0  0  0  0  0  0
    2.7976    2.7552    0.0000 C   0  0  0  0  0  0  0  0  0  0  0  0
    3.0441    1.9674    0.0000 C   0  0  0  0  0  0  0  0  0  0  0  0
    2.4874    1.3623    0.0000 O   0  5  0  0  0  0  0  0  0  0  0  0
    1.9952    2.9349    0.0000 C   0  0  0  0  0  0  0  0  0  0  0  0
    1.7494    3.7201    0.0000 C   0  0  0  0  0  0  0  0  0  0  0  0
    1.1923    3.1146    0.0000 C   0  0  0  0  0  0  0  0  0  0  0  0
    1.4381    2.3294    0.0000 C   0  0  0  0  0  0  0  0  0  0  0  0
    4.0954    1.0023    0.0000 C   0  0  0  0  0  0  0  0  0  0  0  0
    3.5382    0.3969    0.0000 C   0  0  0  0  0  0  0  0  0  0  0  0
    4.3411    0.2171    0.0000 C   0  0  0  0  0  0  0  0  0  0  0  0
    4.8983    0.8225    0.0000 C   0  0  0  0  0  0  0  0  0  0  0  0
    1.3261   -0.0230    0.0000 U   0  1  0  0  0  0  0  0  0  0  0  0
   -0.0409   -0.7743    0.0000 C   0  0  0  0  0  0  0  0  0  0  0  0
    0.6674   -0.3513    0.0000 C   0  0  0  0  0  0  0  0  0  0  0  0
    0.6553    0.4736    0.0000 C   0  5  0  0  0  0  0  0  0  0  0  0
   -0.0652    0.8755    0.0000 C   0  0  0  0  0  0  0  0  0  0  0  0
   -0.7735    0.4526    0.0000 C   0  0  0  0  0  0  0  0  0  0  0  0
   -0.7613   -0.3723    0.0000 C   0  5  0  0  0  0  0  0  0  0  0  0
   -0.0811    1.4065    0.0000 C   0  0  0  0  0  0  0  0  0  0  0  0
    0.6900    1.7014    0.0000 C   0  0  0  0  0  0  0  0  0  0  0  0
    1.0267    2.4552    0.0000 C   0  0  0  0  0  0  0  0  0  0  0  0
    0.7317    3.2263    0.0000 C   0  0  0  0  0  0  0  0  0  0  0  0
   -0.0221    3.5630    0.0000 C   0  0  0  0  0  0  0  0  0  0  0  0
   -0.7931    3.2680    0.0000 C   0  0  0  0  0  0  0  0  0  0  0  0
   -1.1298    2.5142    0.0000 C   0  0  0  0  0  0  0  0  0  0  0  0
   -0.8349    1.7432    0.0000 C   0  0  0  0  0  0  0  0  0  0  0  0
   -0.0537    2.1550    0.0000 B   0  0  0  0  0  0  0  0  0  0  0  0
   -0.0288   -1.5964    0.0000 C   0  0  0  0  0  0  0  0  0  0  0  0
   -0.7462   -2.0039    0.0000 C   0  0  0  0  0  0  0  0  0  0  0  0
   -0.7462   -2.8288    0.0000 C   0  0  0  0  0  0  0  0  0  0  0  0
   -0.0288   -3.2464    0.0000 C   0  0  0  0  0  0  0  0  0  0  0  0
    0.6886   -2.8288    0.0000 C   0  0  0  0  0  0  0  0  0  0  0  0
    0.6886   -2.0039    0.0000 C   0  0  0  0  0  0  0  0  0  0  0  0
  1  2  2  0      
  2  3  1  0      
  3  4  2  0      
  4  5  1  0      
  5  6  2  0      
  6  1  1  0      
  6  7  1  0      
  5  8  1  0      
  1 12  1  0      
  8  9  1  0      
  8 10  1  0      
  8 11  1  0      
 12 13  1  0      
 12 14  1  0      
 12 15  1  0      
 16 17  2  0      
 17 18  1  0      
 18 19  2  0      
 19 20  1  0      
 20 21  2  0      
 21 16  1  0      
 21 22  1  0      
 20 23  1  0      
 16 27  1  0      
 23 24  1  0      
 23 25  1  0      
 23 26  1  0      
 27 28  1  0      
 27 29  1  0      
 27 30  1  0      
 31 32  2  0      
 32 33  1  0      
 33 34  2  0      
 34 35  1  0      
 35 36  2  0      
 36 31  1  0      
 36 37  1  0      
 35 38  1  0      
 31 42  1  0      
 38 39  1  0      
 38 40  1  0      
 38 41  1  0      
 42 43  1  0      
 42 44  1  0      
 42 45  1  0      
 47 48  2  0      
 48 49  1  0      
 49 50  2  0      
 50 51  1  0      
 51 52  2  0      
 52 47  1  0      
 52 53  1  0      
 51 54  1  0      
 47 58  1  0      
 54 55  1  0      
 54 56  1  0      
 54 57  1  0      
 58 59  1  0      
 58 60  1  0      
 58 61  1  0      
 63 64  2  0      
 64 65  1  0      
 65 66  1  0      
 66 67  2  0      
 67 68  1  0      
 68 63  1  0      
 69 70  1  0      
 70 71  1  0      
 71 72  1  0      
 72 73  1  0      
 73 74  1  0      
 74 75  1  0      
 75 76  1  0      
 76 69  1  0      
 75 77  1  1      
 71 77  1  1      
 77 66  1  0      
 63 78  1  0      
 78 79  2  0      
 79 80  1  0      
 80 81  2  0      
 81 82  1  0      
 82 83  2  0      
 83 78  1  0      
M  CHG  8   7  -1  22  -1  37  -1  46   3  53  -1  62   3  65  -1  68  -1
M  END
