# Supplementary material for: Spontaneous reduction and C–H borylation of arenes mediated by uranium(III) disproportionation
Source: Springer Nature journal article supplement (doi:10.1038/nchem.1392), 2012-07-13
Supplement: 41557_2012_BFnchem1392_MOESM36_ESM.mol [file 41557_2012_BFnchem1392_MOESM36_ESM.mol]

  ChemDraw06211206592D

 56 52  0  0  0  0  0  0  0  0999 V2000
    3.7652   -1.6318    0.0000 C   0  0  0  0  0  0  0  0  0  0  0  0
    4.3257   -2.2409    0.0000 C   0  0  0  0  0  0  0  0  0  0  0  0
    4.0784   -3.0309    0.0000 C   0  0  0  0  0  0  0  0  0  0  0  0
    3.2706   -3.2118    0.0000 C   0  0  0  0  0  0  0  0  0  0  0  0
    2.7101   -2.6026    0.0000 C   0  0  0  0  0  0  0  0  0  0  0  0
    2.9574   -1.8126    0.0000 C   0  0  0  0  0  0  0  0  0  0  0  0
    2.3991   -1.2060    0.0000 O   0  5  0  0  0  0  0  0  0  0  0  0
    1.9056   -2.7828    0.0000 C   0  0  0  0  0  0  0  0  0  0  0  0
    1.6591   -3.5701    0.0000 C   0  0  0  0  0  0  0  0  0  0  0  0
    1.1005   -2.9630    0.0000 C   0  0  0  0  0  0  0  0  0  0  0  0
    1.3469   -2.1757    0.0000 C   0  0  0  0  0  0  0  0  0  0  0  0
    4.0114   -0.8450    0.0000 C   0  0  0  0  0  0  0  0  0  0  0  0
    3.4528   -0.2379    0.0000 C   0  0  0  0  0  0  0  0  0  0  0  0
    4.2578   -0.0576    0.0000 C   0  0  0  0  0  0  0  0  0  0  0  0
    4.8165   -0.6647    0.0000 C   0  0  0  0  0  0  0  0  0  0  0  0
   -3.9715    1.2618    0.0000 C   0  0  0  0  0  0  0  0  0  0  0  0
   -4.6391    1.7513    0.0000 C   0  0  0  0  0  0  0  0  0  0  0  0
   -4.5489    2.5742    0.0000 C   0  0  0  0  0  0  0  0  0  0  0  0
   -3.7912    2.9075    0.0000 C   0  0  0  0  0  0  0  0  0  0  0  0
   -3.1236    2.4180    0.0000 C   0  0  0  0  0  0  0  0  0  0  0  0
   -3.2138    1.5952    0.0000 C   0  0  0  0  0  0  0  0  0  0  0  0
   -2.5490    1.1076    0.0000 O   0  5  0  0  0  0  0  0  0  0  0  0
   -2.3690    2.7500    0.0000 C   0  0  0  0  0  0  0  0  0  0  0  0
   -2.2791    3.5701    0.0000 C   0  0  0  0  0  0  0  0  0  0  0  0
   -1.6138    3.0822    0.0000 C   0  0  0  0  0  0  0  0  0  0  0  0
   -1.7037    2.2621    0.0000 C   0  0  0  0  0  0  0  0  0  0  0  0
   -4.0613    0.4423    0.0000 C   0  0  0  0  0  0  0  0  0  0  0  0
   -3.3960   -0.0456    0.0000 C   0  0  0  0  0  0  0  0  0  0  0  0
   -4.1512   -0.3778    0.0000 C   0  0  0  0  0  0  0  0  0  0  0  0
   -4.8165    0.1101    0.0000 C   0  0  0  0  0  0  0  0  0  0  0  0
   -1.7982   -0.0662    0.0000 U   0  1  0  0  0  0  0  0  0  0  0  0
    1.2664   -0.0427    0.0000 U   0  1  0  0  0  0  0  0  0  0  0  0
   -0.1904   -0.8259    0.0000 C   0  0  0  0  0  0  0  0  0  0  0  0
    0.5199   -0.4018    0.0000 C   0  0  0  0  0  0  0  0  0  0  0  0
    0.5077    0.4254    0.0000 C   0  5  0  0  0  0  0  0  0  0  0  0
   -0.2147    0.8284    0.0000 C   0  0  0  0  0  0  0  0  0  0  0  0
   -0.9250    0.4043    0.0000 C   0  0  0  0  0  0  0  0  0  0  0  0
   -0.9128   -0.4228    0.0000 C   0  5  0  0  0  0  0  0  0  0  0  0
   -2.3216   -1.6434    0.0000 N   0  5  0  0  0  0  0  0  0  0  0  0
   -2.4778   -2.5157    0.0000 Si  0  0  0  0  0  0  0  0  0  0  0  0
   -3.1934   -2.9263    0.0000 C   0  0  0  0  0  0  0  0  0  0  0  0
   -2.5280   -3.3392    0.0000 C   0  0  0  0  0  0  0  0  0  0  0  0
   -1.8174   -3.0102    0.0000 C   0  0  0  0  0  0  0  0  0  0  0  0
   -3.1901   -1.7360    0.0000 Si  0  0  0  0  0  0  0  0  0  0  0  0
   -3.6365   -1.0422    0.0000 C   0  0  0  0  0  0  0  0  0  0  0  0
   -4.0151   -1.7277    0.0000 C   0  0  0  0  0  0  0  0  0  0  0  0
   -3.6504   -2.4207    0.0000 C   0  0  0  0  0  0  0  0  0  0  0  0
    2.1778    1.1290    0.0000 N   0  5  0  0  0  0  0  0  0  0  0  0
    2.3340    2.0014    0.0000 Si  0  0  0  0  0  0  0  0  0  0  0  0
    3.0496    2.4120    0.0000 C   0  0  0  0  0  0  0  0  0  0  0  0
    2.3842    2.8249    0.0000 C   0  0  0  0  0  0  0  0  0  0  0  0
    1.6736    2.4958    0.0000 C   0  0  0  0  0  0  0  0  0  0  0  0
    3.0463    1.2217    0.0000 Si  0  0  0  0  0  0  0  0  0  0  0  0
    3.4927    0.5279    0.0000 C   0  0  0  0  0  0  0  0  0  0  0  0
    3.8713    1.2134    0.0000 C   0  0  0  0  0  0  0  0  0  0  0  0
    3.5066    1.9064    0.0000 C   0  0  0  0  0  0  0  0  0  0  0  0
  1  2  2  0      
  2  3  1  0      
  3  4  2  0      
  4  5  1  0      
  5  6  2  0      
  6  1  1  0      
  6  7  1  0      
  5  8  1  0      
  1 12  1  0      
  8  9  1  0      
  8 10  1  0      
  8 11  1  0      
 12 13  1  0      
 12 14  1  0      
 12 15  1  0      
 16 17  2  0      
 17 18  1  0      
 18 19  2  0      
 19 20  1  0      
 20 21  2  0      
 21 16  1  0      
 21 22  1  0      
 20 23  1  0      
 16 27  1  0      
 23 24  1  0      
 23 25  1  0      
 23 26  1  0      
 27 28  1  0      
 27 29  1  0      
 27 30  1  0      
 33 34  2  0      
 34 35  1  0      
 35 36  1  0      
 36 37  2  0      
 37 38  1  0      
 38 33  1  0      
 40 39  1  0      
 39 44  1  0      
 40 41  1  0      
 40 42  1  0      
 40 43  1  0      
 44 45  1  0      
 44 46  1  0      
 44 47  1  0      
 49 48  1  0      
 48 53  1  0      
 49 50  1  0      
 49 51  1  0      
 49 52  1  0      
 53 54  1  0      
 53 55  1  0      
 53 56  1  0      
M  CHG  8   7  -1  22  -1  31   3  32   3  35  -1  38  -1  39  -1  48  -1
M  END
